# Supplementary material for: Synthesis of highly substituted allylic alcohols by a regio- and stereo-defined CuCl-mediated carbometallation reaction of 3-aryl-substituted secondary propargylic alcohols with Grignard reagents
Source: Royal Society of Chemistry journal article supplement (doi:10.1039/b903769a), 2009-01-01

# Synthesis of Highly Substituted Allylic Alcohols by a Regio- and Stereo-defined CuCl-Mediated Carbometallation Reaction of 3-Aryl Substituted Secondary Propargylic Alcohols with Grignard Reagents

Xiaobing Zhang, Zhan Lu, Chunling Fu, and Shengming Ma\*

*Laboratory of Molecular Recognition and Synthesis, Department of Chemistry, Zhejiang University, Hangzhou 310027, Zhejiang, People's Republic of China.*

E-mail: [masm@mail.sioc.ac.cn](mailto:masm@mail.sioc.ac.cn) Fax: (+86) 21-62609305

## *Table of Contents*

|                                                                                                                                                      |                 |
|------------------------------------------------------------------------------------------------------------------------------------------------------|-----------------|
| Materials                                                                                                                                            | <b>S2</b>       |
| Synthesis of Starting Materials: 3-Aryl Substituted Secondary Propargylic Alcohols ( <b>1a-1k</b> )                                                  | <b>S2-S7</b>    |
| Synthesis of Optically Active ( <i>S</i> )-4-Phenyl-3-buten-2-ol (( <i>S</i> )- <b>1a</b> )                                                          | <b>S7- S8</b>   |
| The Reaction of Propargylic Alcohols with Grignard Reagents Followed by Protonolysis ( <b>2a-2d</b> and <b>5a</b> )                                  | <b>S8-S12</b>   |
| The Reaction of Propargylic Alcohols with Grignard Reagents Followed by Iodination ( <b>4a-4m</b> and <b>6a</b> )                                    | <b>S12-S23</b>  |
| The Reaction of Propargylic Alcohols with Grignard Reagents Followed by Allylation ( <b>7a-7g</b> )                                                  | <b>S23-S28</b>  |
| The Reaction of <b>1a</b> with <i>n</i> -C <sub>5</sub> H <sub>11</sub> MgBr Followed by Pd-catalyzed Kumada-type Coupling Reaction ( <b>8a-8e</b> ) | <b>S29-S33</b>  |
| Synthesis of 5-Methyl-4-( <i>n</i> -pentyl)-3-phenyl-2(5 <i>H</i> )-furanone ( <b>9a</b> )                                                           | <b>S33-S34</b>  |
| References                                                                                                                                           | <b>S35</b>      |
| <sup>1</sup> H/ <sup>13</sup> C NMR Spectra of These Compounds                                                                                       | <b>S36-S126</b> |

## Experimental Section

**Materials.** Et<sub>2</sub>O and THF were distilled from Na/benzophenone, Et<sub>3</sub>N was distilled from KOH, and DMSO was distilled from CaH<sub>2</sub>. The commercially available chemicals were purchased and used without additional purification unless otherwise noted. Melting points were determined by a semi automatic melting point apparatus made by Shenguang in China.

### 1. Synthesis of 3-Aryl Substituted Secondary Propargylic Alcohols

#### General Procedure for Synthesis of 1a-d:<sup>1</sup>

To a dry three-necked flask containing the magnesium turnings (2.88 g, 0.12 mol) and I<sub>2</sub> (a few crystals) in THF (120 mL) were added several drops of ethyl bromide. Upon the initiation of the Grignard reaction, the remaining ethyl bromide (0.12 mol) was added dropwise, which was followed by stirring until the magnesium disappeared. Phenylethyne (0.10 mol) was added dropwise into the solution at 55 °C followed by stirring for 1.5 h at this temperature. Then corresponding aldehyde (fresh distilled) or acetone (0.08 mol) was added at 55 °C and the resulting mixture was stirred at this temperature for 2 h. The reaction mixture was then quenched with an aqueous solution of saturated NH<sub>4</sub>Cl and extracted with Et<sub>2</sub>O. The combined organic layer was washed with 5 % HCl, sat. NaHCO<sub>3</sub> (aq.), brine, and dried over anhydrous Na<sub>2</sub>SO<sub>4</sub>. Filtration, evaporation of the solvent, and distillation afforded the propargylic alcohols.

#### (1) 4-Phenyl-3-butyn-2-ol (1a)

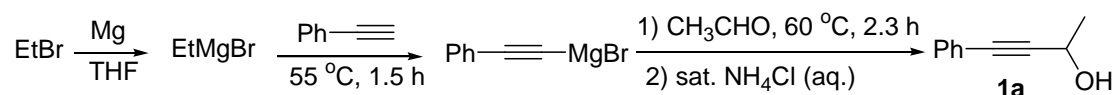

The reaction of ethyl bromide (8.96 mL,  $d = 1.461$  g/mL, 13.09 g, 0.12 mol), magnesium turnings (2.88 g, 0.12 mol), phenylethyne (11.0 mL,  $d = 0.930$  g/mL, 10.20 g, 0.10 mol), and acetaldehyde (4.0 mL,  $d = 0.780$  g/mL, 3.12 g, 0.07 mol) in THF (120 mL) afforded **1a**<sup>2</sup> (8.72 g, 84%, 126-128 °C/2.2 mmHg): Liquid; <sup>1</sup>H NMR (300 MHz, CDCl<sub>3</sub>)  $\delta$  7.46-7.38 (m, 2 H), 7.33-7.27 (m, 3 H), 4.81-4.72 (m, 1 H), 2.24 (bs, 1 H), 1.55 (d,  $J = 6.6$  Hz, 3 H).

**(2) 1-Phenyl-1-octyn-3-ol (1b)**

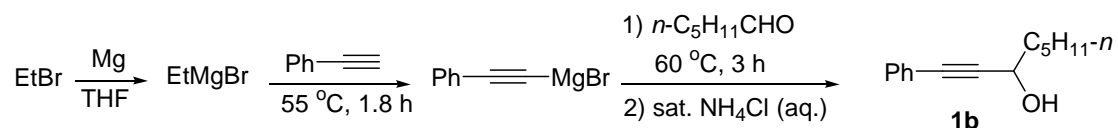

The reaction of ethyl bromide (8.96 mL,  $d = 1.461$  g/mL, 13.09 g, 0.12 mol), magnesium turnings (2.88 g, 0.12 mol), phenylethyne (11.0 mL,  $d = 0.930$  g/mL, 10.20 g, 0.10 mol), and hexanal (9.9 mL,  $d = 0.834$  g/mL, 8.23 g, 0.08 mol) in THF (120 mL) afforded **1b**<sup>3</sup> (11.12 g, 67%, 165.5 °C/10.5 mmHg): Liquid; <sup>1</sup>H NMR (400 MHz, CDCl<sub>3</sub>)  $\delta$  7.47-7.41 (m, 2 H), 7.35-7.27 (m, 3 H), 4.61 (t,  $J = 6.8$  Hz, 1 H), 2.35-2.15 (m, 1 H), 1.88-1.74 (m, 2 H), 1.60-1.44 (m, 2 H), 1.40-1.28 (m, 4 H), 0.92 (t,  $J = 6.2$  Hz, 3 H).

**(3) 1,3-Diphenyl-2-propyn-1-ol (1c)**

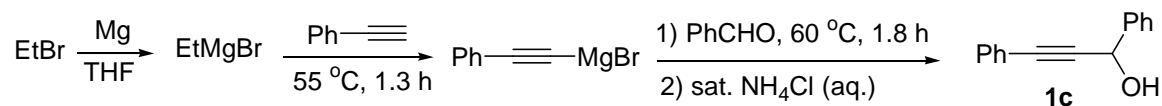

The reaction of ethyl bromide (6.9 mL,  $d = 1.461$  g/mL, 10.08 g, 0.09 mol), magnesium turnings (2.10 g, 0.09 mol), phenylethyne (8.8 mL,  $d = 0.930$  g/mL, 8.18 g, 0.08 mol), and benzaldehyde (8.2 mL,  $d = 1.045$  g/mL, 8.57 g, 0.08 mol) in THF (70 mL) afforded **1c**<sup>4</sup> (13.55 g, 81%): Liquid; <sup>1</sup>H NMR (300 MHz, CDCl<sub>3</sub>)  $\delta$

7.63-7.56 (m, 2 H), 7.49-7.41 (m, 2 H), 7.40-7.25 (m, 6 H), 5.66 (s, 1 H), 2.59 (bs, 1 H).

**(4) 2-Methyl-4-phenyl-3-butyn-2-ol (1d)**

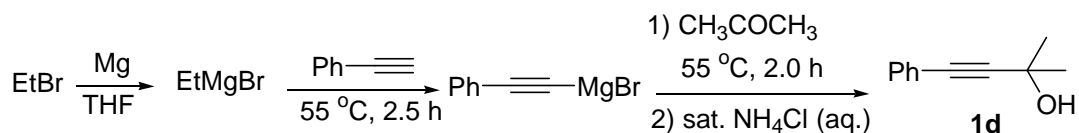

The reaction of ethyl bromide (0.90 mL,  $d = 1.461$  g/mL, 1.31 g, 0.012 mol), magnesium turnings (0.29 g, 0.012 mol), phenylethyne (1.1 mL,  $d = 0.930$  g/mL, 1.02 g, 0.01 mol), and acetone (0.59 mL,  $d = 0.791$  g/mL, 0.47 g, 0.008 mol) in THF (12 mL) afforded a crude product, which was purified by chromatography on silica gel (eluent: petroleum ether/ethyl acetate = 10/1) to afford **1d**<sup>5</sup> (1.22 g, 94%): Liquid; <sup>1</sup>H NMR (300 MHz, CDCl<sub>3</sub>)  $\delta$  7.44-7.38 (m, 2 H), 7.32-7.25 (m, 3 H), 2.364 (s, 1 H), 1.62 (s, 6 H).

**General Procedure for the Synthesis of 1e-k:**<sup>6</sup>

To a dry three-necked flask were added aryl iodide (2 mmol), 3-butyn-2-ol (4 mmol, 2 equiv), CuI (2 mol%), Pd(PPh<sub>3</sub>)<sub>2</sub>Cl<sub>2</sub> (2 mol%), DMSO (5 mL), and Et<sub>3</sub>N (5 mL). The resulting mixture was then heated at 40-45 °C. After complete conversion of the starting material as monitored by TLC, the reaction mixture was quenched with an aqueous solution of saturated NH<sub>4</sub>Cl and extracted with Et<sub>2</sub>O. The combined organic layer was washed with 5 % HCl, sat. NaHCO<sub>3</sub> (aq.), brine, and dried over anhydrous Na<sub>2</sub>SO<sub>4</sub>. Filtration, evaporation, and chromatography on silica gel (eluent: petroleum ether/ethyl acetate = 10/1~2/1) afforded the desired product.

**(1) 4-(*m*-Methylphenyl)-3-butyn-2-ol (1e)**

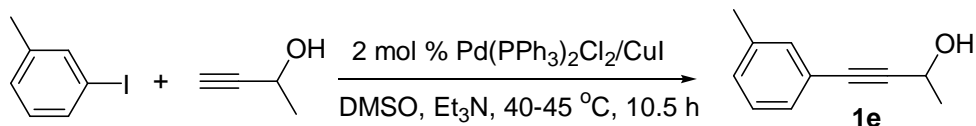

The reaction of 3-iodotoluene (1.0959 g, 5.0 mmol), 3-butyn-2-ol (0.6983 g, 9.9 mmol), CuI (0.0193 g, 0.10 mmol, 2 mol%), and Pd(PPh<sub>3</sub>)<sub>2</sub>Cl<sub>2</sub> (0.0675 g, 0.096 mmol, 2 mol%) in 12 mL of DMSO and 10 mL of Et<sub>3</sub>N afforded **1e**<sup>7</sup> (0.7166 g, 89%): Liquid; <sup>1</sup>H NMR (300 MHz, CDCl<sub>3</sub>) δ 7.27-7.08 (m, 4 H), 4.80-4.70 (m, 1 H), 2.32 (d, *J* = 0.3 Hz, 3 H), 2.04-1.98 (m, 1 H), 1.55 (d, *J* = 6.6 Hz, 3 H).

**(2) 4-(*p*-Methylphenyl)-3-butyn-2-ol (1f)**

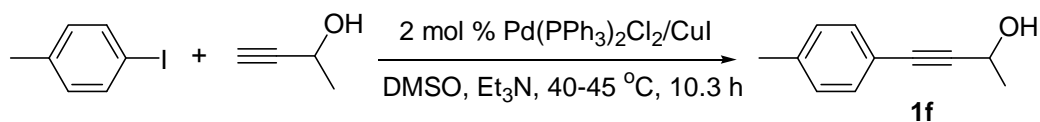

The reaction of 4-iodotoluene (1.1127 g, 5.1 mmol), 3-butyn-2-ol (0.7260 g, 10.4 mmol), CuI (0.0202 g, 0.11 mmol, 2 mol%), and Pd(PPh<sub>3</sub>)<sub>2</sub>Cl<sub>2</sub> (0.0722 g, 0.10 mmol, 2 mol%) in 20 mL of DMSO and 20 mL of Et<sub>3</sub>N afforded **1f**<sup>7</sup> (0.7458 g, 91%): Liquid; <sup>1</sup>H NMR (300 MHz, CDCl<sub>3</sub>) δ 7.34-7.29 (m, 2 H), 7.12-7.07 (m, 2 H), 4.80-4.70 (m, 1 H), 2.42 (bs, 1 H), 2.33 (s, 3 H), 1.54 (d, *J* = 6.6 Hz, 3 H).

**(3) 4-(*p*-Methoxyphenyl)-3-butyn-2-ol (1g)**

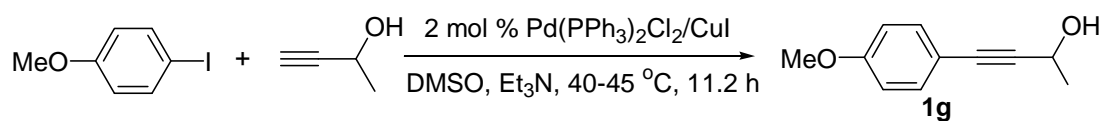

The reaction of 4-iodoanisole (0.4880 g, 2.1 mmol), 3-butyn-2-ol (0.2808 g, 4.0 mmol), CuI (0.0080 g, 0.04 mmol, 2 mol%), and Pd(PPh<sub>3</sub>)<sub>2</sub>Cl<sub>2</sub> (0.0284 g, 0.04 mmol, 2 mol%) in 5 mL of DMSO and 5 mL of Et<sub>3</sub>N afforded **1g**<sup>7</sup> (0.2863 g, 78%): Liquid; <sup>1</sup>H NMR (300 MHz, CDCl<sub>3</sub>) δ 7.39-7.34 (m, 2 H), 6.86-6.80 (m, 2 H), 4.80-4.70 (m, 1 H), 3.81 (s, 3 H), 2.01 (d, *J* = 4.5 Hz, 1 H), 1.54 (d, *J* = 6.6 Hz, 3 H).

**(4) 4-(*p*-Chlorophenyl)-3-butyn-2-ol (1h)**

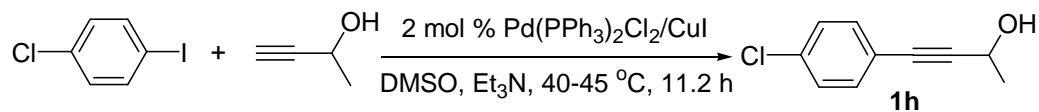

The reaction of 4-chloriodobenzene (0.4792 g, 2.0 mmol), 3-butyn-2-ol (0.2737 g, 3.9 mmol), CuI (0.0084 g, 0.044 mmol, 2 mol%), Pd(PPh<sub>3</sub>)<sub>2</sub>Cl<sub>2</sub> (0.0279 g, 0.039 mmol, 2 mol%) in 8 mL of DMSO and 8 mL of Et<sub>3</sub>N afforded **1h**<sup>7</sup> (0.3376 g, 93%): Liquid; <sup>1</sup>H NMR (300 MHz, CDCl<sub>3</sub>) δ 7.38-7.33 (m, 2 H), 7.31-7.26 (m, 2 H), 4.80-4.70 (m, 1 H), 2.02-1.96 (m, 1 H), 1.55 (d, *J* = 6.6 Hz, 3 H).

**(5) 4-(2-Pyridyl)-3-butyn-2-ol (1i)**

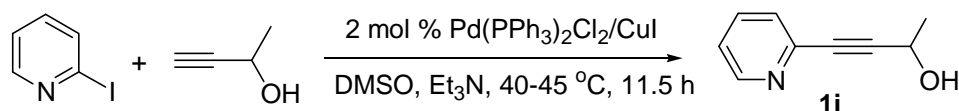

The reaction of 2-iodopyridine (0.4148 g, 2.0 mmol), 3-butyn-2-ol (0.2832 g, 4.0 mmol), CuI (0.0082 g, 0.043 mmol, 2 mol%), and Pd(PPh<sub>3</sub>)<sub>2</sub>Cl<sub>2</sub> (0.0280 g, 0.040 mmol, 2 mol%) in 5 mL of DMSO and 5 mL of Et<sub>3</sub>N afforded **1i**<sup>8</sup> (0.2801 g, 94%). The reaction mixture was extracted with ethyl acetate and washed with brine. **1i**: Liquid; <sup>1</sup>H NMR (300 MHz, CDCl<sub>3</sub>) δ 8.58-8.54 (m, 1 H), 7.65 (td, *J* = 7.7 and 1.5 Hz, 1 H), 7.43-7.38 (m, 1 H), 7.27-7.20 (m, 1 H), 4.86-4.76 (m, 1 H), 3.56 (d, *J* = 5.1 Hz, 1 H), 1.59 (d, *J* = 6.6 Hz, 3 H).

**(6) 4-(2-Thienyl)-3-butyn-2-ol (1j)**

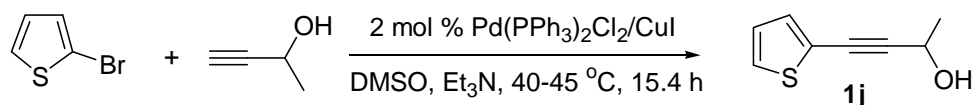

The reaction of 2-bromothiophene (0.3548 g, 2.2 mmol), 3-butyn-2-ol (0.2792 g, 4.0 mmol), CuI (0.0099 g, 0.052 mmol, 2 mol%), and Pd(PPh<sub>3</sub>)<sub>2</sub>Cl<sub>2</sub> (0.0283 g, 0.040 mmol, 2 mol%) in 5 mL of DMSO and 5 mL of Et<sub>3</sub>N afforded **1j**<sup>9</sup> (0.1921 g, 58%):

Liquid;  $^1\text{H}$  NMR (300 MHz,  $\text{CDCl}_3$ )  $\delta$  7.25 (d,  $J = 1.2$  Hz, 1 H), 7.20 (dd,  $J = 3.6$  and 1.2 Hz, 1 H), 6.99-6.95 (m, 1 H), 4.81-4.72 (m, 1 H), 2.01-1.95 (m, 1 H), 1.55 (d,  $J = 6.6$  Hz, 3 H).

**(7) 4-(*m*-Trifluoromethylphenyl)-3-butyn-2-ol (**1k**)**

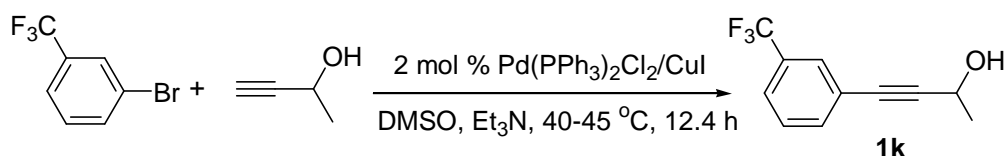

The reaction of 3-trifluoromethylphenyl bromide (0.4577 g, 2.0 mmol), 3-butyn-2-ol (0.2772 g, 4.0 mmol), CuI (0.0092 g, 0.048 mmol, 2 mol%), and Pd(PPh<sub>3</sub>)<sub>2</sub>Cl<sub>2</sub> (0.0296 g, 0.042 mmol, 2 mol%) in 5 mL of DMSO and 5 mL of Et<sub>3</sub>N afforded **1k** (0.3224 g, 74%): Liquid;  $^1\text{H}$  NMR (300 MHz,  $\text{CDCl}_3$ )  $\delta$  7.69 (s, 1 H), 7.61-7.51 (m, 2 H), 7.46-7.39 (m, 1 H), 4.82-4.73 (m, 1 H), 2.20-2.08 (m, 1 H), 1.57 (d,  $J = 6.6$  Hz, 3 H);  $^{13}\text{C}$  NMR ( $\text{CDCl}_3$ , 75 MHz)  $\delta$  134.7, 130.9 (q,  $J = 32.4$  Hz, 1 C), 128.8, 128.4 (q,  $J = 3.6$  Hz, 1 C), 124.9 (q,  $J = 3.7$  Hz, 1 C), 123.6 (q,  $J = 270.8$  Hz), 123.5, 92.5, 82.5, 58.7, 24.2;  $^{19}\text{F}$  NMR ( $\text{CDCl}_3$ , 282 MHz)  $\delta$  -63.0; IR (neat,  $\text{cm}^{-1}$ ) 3341, 2985, 2934, 1610, 1588, 1487, 1432, 1372, 1335, 1237, 1169, 1130, 1073, 1039; MS ( $m/z$ ) 214 ( $\text{M}^+$ , 10.52), 199 (100), HRMS calcd for  $\text{C}_{11}\text{H}_9\text{F}_3\text{O}$  ( $\text{M}^+$ ): 214.0605, found: 214.0604.

**2. Synthesis of Optically Active Propargylic Alcohol (*S*)-4-Phenyl-3-butyn-2-ol**

**((*S*)-1a) from Racemic Propargylic Alcohol **1a**<sup>10,11</sup>**

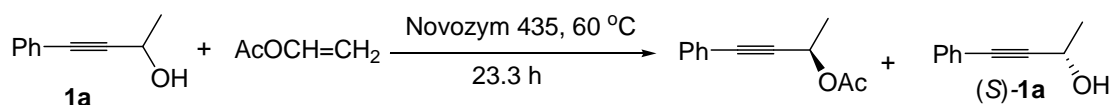

To a mixture of racemic **1a** (4.0032 g) and vinyl acetate (100 mL) was added Novozym 435 (0.7008 g). After shaking at 60 °C for 23.3 h as monitored by TLC, the

reaction mixture was worked up by filtration and washing with ether. Evaporation and purification by flash chromatography on silica gel (eluent: petroleum ether/ether = from 60/1 to 20/1) afforded (*S*)-**1a** (1.6780 g, 42%): ee > 99% (HPLC conditions: Chiralcel OJ-H, *n*-hexane/*i*-PrOH = 90/10, 1 mL/min,  $\lambda = 230$  nm, tr 10.121 min (major), 8.978 min (minor),  $[\alpha]_{\text{D}}^{23} = -45.4^{\circ}$  ( $c = 1.06$ , Et<sub>2</sub>O)) and (*R*)-4-Phenyl-3-butyn-2-ol acetate (2.7696 g, 54%): ee = 71% (ee value was determined after its conversion to the corresponding alcohol),  $[\alpha]_{\text{D}}^{20} = +145.8^{\circ}$  ( $c = 1.03$ , CHCl<sub>3</sub>). (*S*)-**1a**: Liquid; <sup>1</sup>H NMR (300 MHz, CDCl<sub>3</sub>)  $\delta$  7.46-7.39 (m, 2 H), 7.34-7.27 (m, 3 H), 4.76 (q,  $J = 6.6$  Hz, 1 H), 2.16 (bs, 1 H), 1.56 (d,  $J = 6.6$  Hz, 3 H). (*S*)-**1a** was prepared by a different method in 98% ee,  $[\alpha]_{\text{D}}^{25} = -44.8^{\circ}$  ( $c = 1.0$ , Et<sub>2</sub>O).<sup>7</sup>

### 3. General Procedure for the CuCl-Mediated Carbometallation of Propargylic Alcohols with Grignard Reagents Followed by Protonolysis

To a solution of CuCl (1.0 mmol, 1 equiv) and propargylic alcohol (1 mmol) in toluene (1.5 mL) under a nitrogen atmosphere was added the corresponding Grignard reagent (6 equiv, 6 mmol) dropwise at -78 °C in 15 min, which was followed by warming up to rt naturally. After complete conversion of the starting material as monitored by TLC, the reaction mixture was quenched with an aqueous solution of saturated NH<sub>4</sub>Cl at 0 °C, and extracted with Et<sub>2</sub>O. The combined organic layer was washed with 5 % HCl, sat. NaHCO<sub>3</sub> (aq.), brine, and dried over anhydrous Na<sub>2</sub>SO<sub>4</sub>. After filtration and evaporation, the NMR yield and ratio were determined by using 1,3,5-trimethylbenzene as the internal standard (35  $\mu$ L, 0.25 mmol). Chromatography on silica gel (eluent: petroleum ether/ethyl acetate = 40/1~2/1) of the crude product



afforded the desired product.

**(1) 3-(*n*-Pentyl)-4-phenyl-3(*E*)-buten-2-ol (*E*-2a)**

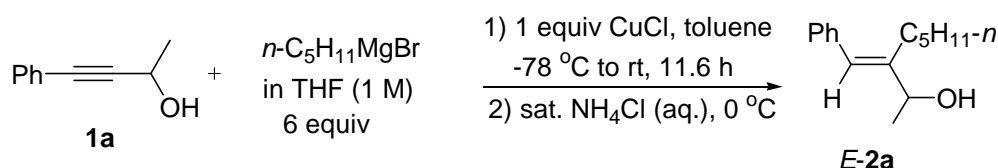

The reaction of **1a** (0.1477 g, 1.0 mmol), CuCl (0.1005 g, 1.0 mmol, 1 equiv), 1.5 mL of toluene, and a solution of  $n\text{-C}_5\text{H}_{11}\text{MgBr}$  in THF (1 M, 6 mL, 6 mmol, 6 equiv) afforded ***E*-2a** (0.1984 g, 90%): Liquid;  $^1\text{H}$  NMR (300 MHz,  $\text{CDCl}_3$ )  $\delta$  7.36-7.38 (m, 2 H), 7.27-7.18 (m, 3 H), 6.56 (s, 1 H), 4.42 (q,  $J = 6.4$  Hz, 1 H), 2.42-2.32 (m, 1 H), 2.22-2.10 (m, 1 H), 1.65-1.55 (m, 1 H), 1.55-1.43 (m, 2 H), 1.39 (d,  $J = 6.6$  Hz, 3 H), 1.37-1.23 (m, 4 H), 0.91-0.83 (m, 3 H);  $^{13}\text{C}$  NMR ( $\text{CDCl}_3$ , 75 MHz)  $\delta$  146.8, 137.7, 128.5, 128.1, 126.3, 124.0, 71.7, 32.2, 28.8, 28.4, 22.5, 22.3, 14.0; IR (neat,  $\text{cm}^{-1}$ ) 3357, 3056, 3024, 2957, 2929, 2868, 1649, 1599, 1493, 1464, 1368, 1284, 1165, 1114, 1071; MS ( $m/z$ ) 200 ( $(\text{M}^+ - \text{H}_2\text{O})$ , 10.73), 129 (100); Elemental analysis calcd for  $\text{C}_{15}\text{H}_{22}\text{O}$ : C, 82.52, H, 10.16; Found: C, 82.86, H, 10.03.

**(2) 3-(*n*-Pentyl)-4-(2-thienyl)-3(*E*)-buten-2-ol (*E*-2b)**

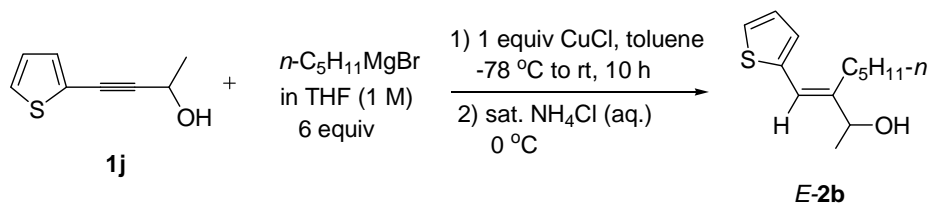

The reaction of **1j** (0.1530 g, 1.0 mmol), CuCl (0.0991 g, 1.0 mmol, 1 equiv), 1.5 mL of toluene, and a solution of  $n\text{-C}_5\text{H}_{11}\text{MgBr}$  in THF (6 mL, 1 M, 6 mmol, 6 equiv) afforded ***E*-2b** (0.1881 g, 83%): Liquid;  $^1\text{H}$  NMR (300 MHz,  $\text{CDCl}_3$ )  $\delta$  7.26-7.22 (m, 1 H), 7.02-6.95 (m, 2 H), 6.67 (s, 1 H), 4.38 (q,  $J = 6.3$  Hz, 1 H), 2.54-2.42 (m, 1 H), 2.34-2.22 (m, 1 H), 1.70 (bs, 1 H), 1.60-1.47 (m, 2 H), 1.45-1.32 (m, 7 H), 0.91 (t,  $J =$

7.1 Hz, 3 H);  $^{13}\text{C}$  NMR ( $\text{CDCl}_3$ , 75 MHz)  $\delta$  145.1, 140.2, 127.2, 126.7, 124.9, 117.4, 72.4, 32.5, 29.3, 28.4, 22.5, 22.4, 14.1; IR (neat,  $\text{cm}^{-1}$ ) 3357, 2956, 2931, 2869, 1637, 1508, 1466, 1367, 1319, 1282, 1214, 1156, 1103, 1059, 1007; MS ( $m/z$ ) 224 ( $\text{M}^+$ , 28.70), 153 (100); Elemental analysis calcd for  $\text{C}_{13}\text{H}_{20}\text{OS}$ : C, 69.59, H, 8.98; Found: C, 69.54, H, 8.96.

**(3) 3-(*n*-Pentyl)-4-(2-pyridyl)-3(*E*)-buten-2-ol (*E*-2c)**

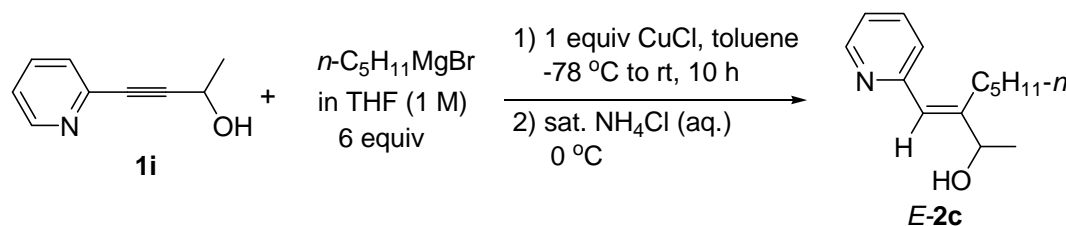

The reaction of **1i** (0.1471 g, 1.0 mmol), CuCl (0.0993 g, 1.0 mmol, 1 equiv), 1.5 mL of toluene, and a solution of  $n\text{-C}_5\text{H}_{11}\text{MgBr}$  in THF (6 mL, 1 M, 6 mmol, 6 equiv) afforded ***E*-2c** (0.1720 g, 78%). The organic layer was washed with brine. ***E*-2c**: Liquid;  $^1\text{H}$  NMR (300 MHz,  $\text{CDCl}_3$ )  $\delta$  8.59-5.55 (m, 1 H), 7.62 (td,  $J = 7.8$  and  $J = 2.1$  Hz, 1 H), 7.21 (d,  $J = 8.1$  Hz, 1 H), 7.08 (ddd,  $J = 7.5$ , 5.0 and 1.2 Hz, 1 H), 6.60 (s, 1 H), 4.42 (q,  $J = 2.8$  Hz, 1 H), 2.75-2.64 (m, 1 H), 2.40-2.28 (m, 1 H), 2.08 (bs, 1 H), 1.54-1.44 (m, 2 H), 1.40 (d,  $J = 6.3$  Hz, 3 H), 1.34-1.22 (m, 4 H), 0.86 (t,  $J = 7.1$  Hz, 3 H);  $^{13}\text{C}$  NMR ( $\text{CDCl}_3$ , 75 MHz)  $\delta$  156.9, 151.7, 149.1, 135.9, 123.8, 123.0, 120.9, 71.7, 32.2, 28.7, 28.6, 22.5, 22.3, 14.0; IR (neat,  $\text{cm}^{-1}$ ) 3379, 2957, 2929, 2868, 1648, 1586, 1563, 1468, 1429, 1367, 1291, 1152, 1118, 1059; MS ( $m/z$ ) 219 ( $\text{M}^+$ , 7.65), 158 (100); HRMS calcd for  $\text{C}_{14}\text{H}_{21}\text{NONa}$  ( $\text{M}^+\text{+Na}$ ): 242.1515; found: 242.1510.

**(4) 2-(*n*-Pentyl)-1,3-diphenyl-3(*E*)-propen-2-ol (*E*-2d)**

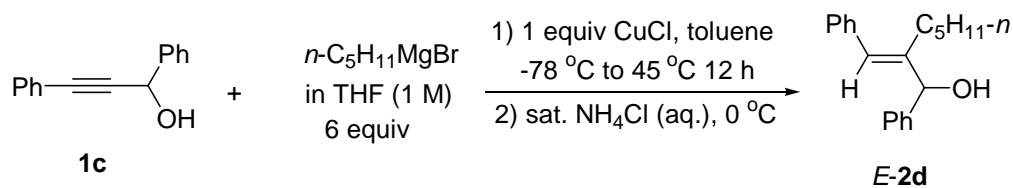

The reaction of **1c** (0.2092 g, 1.0 mmol), CuCl (0.1002 g, 1.0 mmol, 1 equiv), 1.5 mL of toluene, and a solution of *n*-C<sub>5</sub>H<sub>11</sub>MgBr in THF (6 mL, 1 M, 6 mmol, 6 equiv) afforded *E*-**2d** (0.1273 g, 45%): Liquid; <sup>1</sup>H NMR (300 MHz, CDCl<sub>3</sub>) δ 7.45-7.40 (m, 2 H), 7.38-7.25 (m, 7 H), 7.25-7.17 (m, 1 H), 6.77 (s, 1 H), 5.31 (s, 1 H), 2.34-2.20 (m, 1 H), 2.05 (bs, 1 H), 2.02-1.90 (m, 1 H), 1.45-1.28 (m, 2 H), 1.25-1.12 (m, 4 H), 0.84-0.76 (m, 3 H); <sup>13</sup>C NMR (CDCl<sub>3</sub>, 75 MHz) δ 144.3, 142.3, 137.6, 128.7, 128.4, 128.2, 127.7, 126.8, 126.5, 125.6, 77.8, 32.0, 28.6, 28.5, 22.2, 13.9; IR (neat, cm<sup>-1</sup>) 3396, 3026, 2955, 2929, 2859, 1654, 1599, 1576, 1493, 1450, 1378, 1232, 1187, 1073, 1030; MS (m/z) 280 (M<sup>+</sup>, 6.55), 209 (100); Elemental analysis calcd for C<sub>20</sub>H<sub>24</sub>O: C, 85.67, H, 8.63; Found: C, 85.75, H, 8.62.

#### 4. Synthesis of 4-deutero-3-(*n*-pentyl)-4-phenyl-3(*E*)-buten-2-ol (*E*-5a)

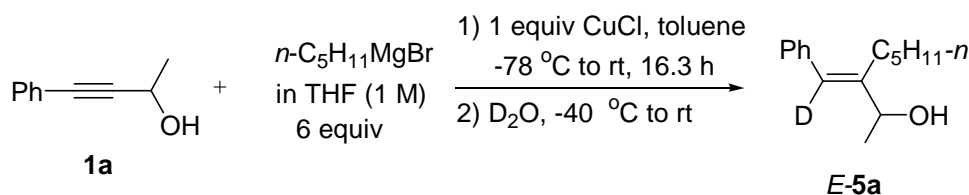

Following the procedure for the CuCl-mediated carbometallation of propargylic alcohols with Grignard reagents described above, the reaction was conducted using **1a** (0.1488 g, 1.0 mmol), CuCl (0.0998 g, 1.0 mmol, 1 equiv), 1.5 mL of toluene, and a solution of *n*-C<sub>5</sub>H<sub>11</sub>MgBr in THF (6 mL, 1 M, 6 mmol, 6 equiv). After complete conversion of the starting material as monitored by TLC, the reaction mixture was quenched with D<sub>2</sub>O (0.5 mL) at -40 °C and warmed up to rt to afford *E*-**5a** (0.1961 g,

88%, D incorporation: 99%): Liquid;  $^1\text{H}$  NMR (300 MHz,  $\text{CDCl}_3$ )  $\delta$  7.36-7.29 (m, 2 H), 7.27-7.17 (m, 3 H), 6.55 (s, 0.01 H), 4.41 (q,  $J = 6.4$  Hz, 1 H), 2.42-2.30 (m, 1 H), 2.22-2.10 (m, 1 H), 1.77 (bs, 1 H), 1.56-1.42 (m, 2 H), 1.38 (d,  $J = 6.6$  Hz, 3 H), 1.34-1.22 (m, 4 H), 0.90-0.83 (m, 3 H);  $^{13}\text{C}$  NMR ( $\text{CDCl}_3$ , 75 MHz)  $\delta$  146.7, 137.6, 128.5, 128.1, 126.3, 71.7, 32.2, 28.8, 28.4, 22.5, 22.3, 14.0; IR (neat,  $\text{cm}^{-1}$ ) 3363, 3056, 3021, 2957, 2929, 2868, 1639, 1597, 1493, 1464, 1370, 1285, 1114, 1063; MS (m/z) 219 ( $\text{M}^+$ , 3.22), 148 (100); HRMS calcd for  $\text{C}_{15}\text{H}_{21}\text{DO}$  ( $\text{M}^+$ ): 219.1733, found 219.1730.

## **5. General Procedure for the CuCl-Mediated Carbometallation of Propargylic Alcohols with Grignard Reagents Followed by Iodination**

Following the procedure for the CuCl-mediated carbometallation of propargylic alcohols with Grignard reagents described above, the reaction was conducted using propargylic alcohol (1 mmol), CuCl (1.0 mmol, 1 equiv), 1.5 mL of toluene, and a solution of Grignard reagent in THF (6 equiv, 6 mmol). After complete conversion of the starting material as monitored by TLC, the reaction mixture was quenched by the dropwise addition of a solution of  $\text{I}_2$  (6 mmol, 6 equiv) in 5 mL of THF at  $-40$  °C, followed by warming up to rt naturally for 1 h, treatment with an aqueous solution of saturated  $\text{Na}_2\text{S}_2\text{O}_3$  at  $0$  °C, and extraction with  $\text{Et}_2\text{O}$ . The combined organic layer was washed with 5 % HCl, sat.  $\text{NaHCO}_3$  (aq.), brine, and dried over anhydrous  $\text{Na}_2\text{SO}_4$ . After filtration and evaporation, the NMR yield and ratio were determined by using 1,3,5-trimethylbenzene as the internal standard (35  $\mu\text{L}$ , 0.25 mmol). Chromatography on silica gel (eluent: petroleum ether/ethyl acetate = 100/1~10/1) of the crude product

afforded the desired product.

**(1) 4-Iodo-3-(*n*-pentyl)-4-phenyl-3(*Z*)-buten-2-ol (*Z*-4a)**

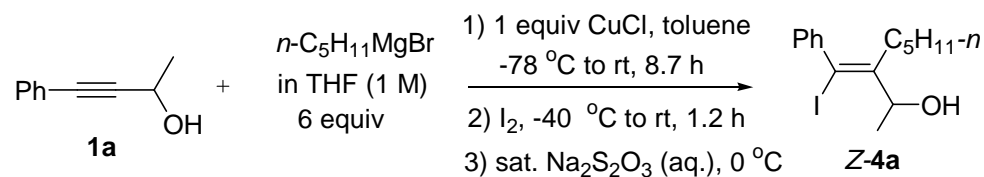

The reaction of **1a** (0.1469 g, 1.0 mmol), CuCl (0.1007 g, 1.0 mmol, 1 equiv), 1.5 mL of toluene, a solution of  $n\text{-C}_5\text{H}_{11}\text{MgBr}$  in THF (6 mL, 1 M, 6 mmol, 6 equiv), and a solution of  $\text{I}_2$  (1.5243 g, 6.0 mmol, 6 equiv) in THF (5 mL) afforded **Z-4a** (0.2878 g, 83%): Liquid;  $^1\text{H}$  NMR (300 MHz,  $\text{CDCl}_3$ )  $\delta$  7.37-7.28 (m, 2 H), 7.28-7.15 (m, 3 H), 4.97-4.87 (m, 1 H), 2.21-1.99 (m, 2 H), 1.93 (bs, 1 H), 1.40 (d,  $J = 6.3$  Hz, 3 H), 1.36-1.20 (m, 2 H), 1.15-0.99 (m, 4 H), 0.74 (t,  $J = 6.9$  Hz, 3 H);  $^{13}\text{C}$  NMR ( $\text{CDCl}_3$ , 100 MHz)  $\delta$  149.3, 144.5, 128.2, 128.1, 127.6, 96.0, 77.0, 31.8, 29.8, 28.8, 22.0, 21.2, 13.8; IR (neat,  $\text{cm}^{-1}$ ) 3363, 2956, 2928, 2865, 1620, 1592, 1486, 1458, 1442, 1367, 1285, 1222, 1175, 1104, 1060; MS ( $m/z$ ) 344 ( $\text{M}^+$ , 0.50), 327 ( $(\text{M}-\text{H}_2\text{O})^+$ , 22.04), 117 (100); HRMS calcd for  $\text{C}_{15}\text{H}_{21}\text{OI}$  ( $\text{M}^+$ ): 344.0637, found: 344.0642.

**(2) (*S*)-4-Iodo-3-(*n*-pentyl)-4-phenyl-3(*Z*)-buten-2-ol ((*S*)-**Z-4a**)**

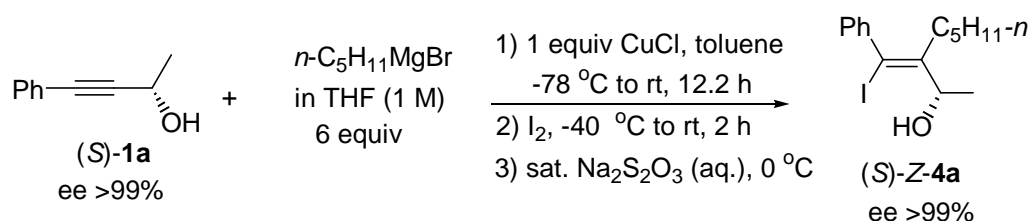

The reaction of (*S*)-(-)-**1a** (0.1474 g, 1.0 mmol, ee > 99%), CuCl (0.0991 g, 1.0 mmol, 1 equiv), 1.5 mL of toluene, a solution of  $n\text{-C}_5\text{H}_{11}\text{MgBr}$  in THF (6 mL, 1 M, 6 mmol, 6 equiv), and a solution of  $\text{I}_2$  (1.4864 g, 5.9 mmol, 5.9 equiv) in THF (5 mL) afforded (*S*)-**Z-4a** (0.2541 g, 73 %): ee > 99% (HPLC conditions: Chiralcel AS-H,

*n*-hexane/*i*-PrOH = 95/5, 0.5 mL/min,  $\lambda$  = 230 nm, tr 9.474 min (major), 10.582 min (minor),  $[\alpha]_D^{20} = +3.4^\circ$  ( $c = 1.02$ , CHCl<sub>3</sub>). Liquid; <sup>1</sup>H NMR (300 MHz, CDCl<sub>3</sub>)  $\delta$  7.36-7.29 (m, 2 H), 7.27-7.17 (m, 3 H), 4.92 (qd,  $J = 6.4$  and  $J = 3.0$  Hz, 1 H), 2.21-1.99 (m, 2 H), 1.96-1.84 (m, 1 H), 1.44-1.24 (m, 5 H), 1.15-0.98 (m, 4 H), 0.74 (t,  $J = 6.8$  Hz, 3 H); <sup>13</sup>C NMR (CDCl<sub>3</sub>, 100 MHz)  $\delta$  149.3, 144.4, 128.1, 128.0, 127.5, 95.9, 76.9, 31.8, 29.7, 28.7, 21.9, 21.2, 13.8; IR (neat, cm<sup>-1</sup>) 3355, 2956, 2928, 2869, 1612, 1592, 1487, 1458, 1442, 1367, 1286, 1222, 1104, 1060; MS ( $m/z$ ) 344 ( $M^+$ , 3.33), 117 (100); HRMS calcd for C<sub>15</sub>H<sub>21</sub>OI ( $M^+$ ): 344.0637, found: 344.0645.

**(3) 4-(*p*-Chlorophenyl)-4-iodo-3-(*n*-pentyl)-3(*Z*)-buten-2-ol (**Z-4b**)**

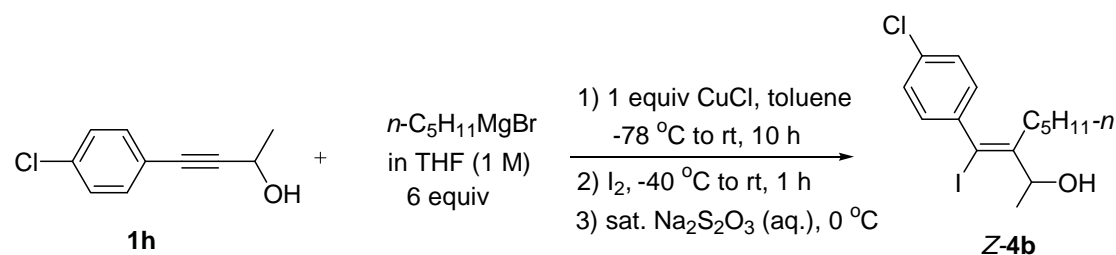

The reaction of **1h** (0.1801 g, 1.0 mmol), CuCl (0.1001 g, 1.0 mmol, 1 equiv), 1.5 mL of toluene, a solution of *n*-C<sub>5</sub>H<sub>11</sub>MgBr in THF (6 mL, 1 M, 6 mmol, 6 equiv), and a solution of I<sub>2</sub> (1.5261 g, 6.0 mmol, 6 equiv) in THF (5 mL) afforded **Z-4b** (0.2930 g, 78%): Solid: m.p. 70.5-71.0 °C (hexane/ethyl acetate); <sup>1</sup>H NMR (300 MHz, CDCl<sub>3</sub>)  $\delta$  7.34-7.26 (m, 2 H), 7.17-7.10 (m, 2 H), 4.89 (q,  $J = 6.6$  Hz, 1 H), 2.20-1.98 (m, 2 H), 1.94 (bs, 1 H), 1.42-1.22 (m, 5 H), 1.18-1.00 (m, 4 H), 0.77 (t,  $J = 6.9$  Hz, 3 H); <sup>13</sup>C NMR (CDCl<sub>3</sub>, 75 MHz)  $\delta$  150.2, 142.9, 133.3, 129.5, 128.5, 94.1, 76.9, 31.8, 29.8, 28.9, 22.0, 21.2, 13.8; IR (KBr, cm<sup>-1</sup>) 3363, 2956, 2929, 2869, 1587, 1486, 1465, 1395, 1367, 1221, 1088, 1060, 1015; MS ( $m/z$ ) 380 ( $M^+$ (<sup>37</sup>Cl), 0.73), 378 ( $M^+$ (<sup>35</sup>Cl), 2.49), 125 (100); Elemental analysis calcd for C<sub>15</sub>H<sub>20</sub>OClI: C, 47.58, H, 5.32; Found:

C, 47.59, H, 5.32.

**(4) 4-Iodo-3-(*n*-pentyl)-4-(*m*-trifluoromethylphenyl)-3(*Z*)-buten-2-ol (Z-4c)**

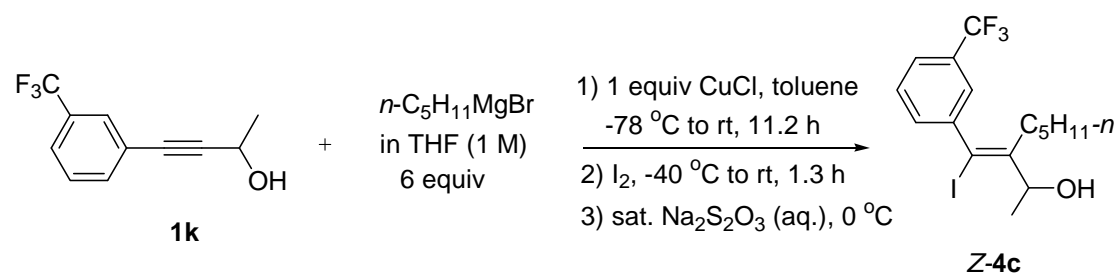

The reaction of **1k** (0.2080 g, 0.97 mmol), CuCl (0.0992 g, 1.0 mmol, 1 equiv), 1.5 mL of toluene, a solution of  $n\text{-C}_5\text{H}_{11}\text{MgBr}$  in THF (6 mL, 1 M, 6 mmol, 6 equiv), and a solution of  $\text{I}_2$  (1.5324 g, 6.0 mmol, 6 equiv) in THF (5 mL) afforded **Z-4c** (0.3020 g, 75%): Liquid;  $^1\text{H}$  NMR (300 MHz,  $\text{CDCl}_3$ )  $\delta$  7.53-7.43 (m, 3 H), 7.42-7.37 (m, 1 H), 4.92 (qd,  $J = 6.5$  and 3.3 Hz, 1 H), 2.18-1.98 (m, 2 H), 1.92 (d,  $J = 3.3$  Hz, 1 H), 1.41 (d,  $J = 6.6$  Hz, 3 H), 1.38-1.23 (m, 2 H), 1.15-1.00 (m, 4 H), 0.74 (t,  $J = 6.9$  Hz, 3 H);  $^{13}\text{C}$  NMR ( $\text{CDCl}_3$ , 75 MHz)  $\delta$  151.0, 145.1, 131.6, 130.6 (q,  $J = 32.1$  Hz, 1 C), 128.8, 125.0 (q,  $J = 3.9$  Hz, 1 C), 124.3 (q,  $J = 3.8$  Hz, 1 C), 123.8, (q,  $J = 271$  Hz, 1 C), 93.1, 76.8, 31.8, 29.8, 28.9, 21.9, 21.3, 13.7;  $^{19}\text{F}$  NMR ( $\text{CDCl}_3$ , 282 MHz) -62.8; IR (neat,  $\text{cm}^{-1}$ ) 3373, 2959, 2931, 2871, 1604, 1589, 1484, 1461, 1432, 1368, 1329, 1310, 1210, 1167, 1131, 1093, 1072, 1001; MS ( $m/z$ ) 412 ( $\text{M}^+$ , 1.47), 185 (100), HRMS calcd for  $\text{C}_{16}\text{H}_{20}\text{F}_3\text{OI}$  ( $\text{M}^+$ ): 412.0511, found: 412.0503.

**(5) 4-Iodo-4-(*m*-methylphenyl)-3-(*n*-pentyl)-3(*Z*)-buten-2-ol (Z-4d)**

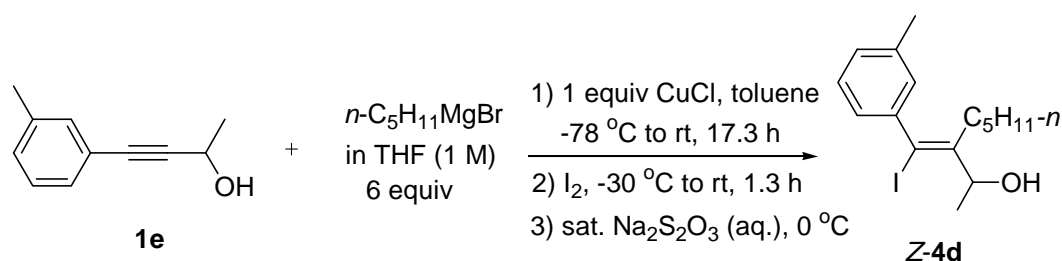

The reaction of **1e** (0.1628 g, 1.0 mmol), CuCl (0.0966 g, 0.98 mmol, 1 equiv), 1.5 mL of toluene, a solution of *n*-C<sub>5</sub>H<sub>11</sub>MgBr in THF (6 mL, 1 M, 6 mmol, 6 equiv), and a solution of I<sub>2</sub> (1.5294 g, 6.0 mmol, 6 equiv) in THF (5 mL) afforded **Z-4d** (0.1795 g, 49%): Liquid; <sup>1</sup>H NMR (300 MHz, CDCl<sub>3</sub>) δ 7.24-7.17 (m, 1 H), 7.06-6.97 (m, 3 H), 4.91 (q, *J* = 6.6 Hz, 1 H), 2.33 (s, 3 H), 2.20-1.98 (m, 2 H), 1.92-1.84 (m, 1 H), 1.42-1.25 (m, 5 H), 1.18-0.98 (m, 4 H), 0.75 (t, *J* = 6.9 Hz, 3 H); <sup>13</sup>C NMR (CDCl<sub>3</sub>, 75 MHz) δ 149.1, 144.4, 137.8, 128.6, 128.4, 128.1, 125.1, 96.4, 77.0, 31.8, 29.8, 28.8, 22.0, 21.4, 21.2, 13.8; IR (neat, cm<sup>-1</sup>) 3383, 2956, 2928, 2860, 1597, 1581, 1481, 1456, 1377, 1367, 1252, 1217, 1183, 1159, 1104, 1059, 1000; MS (*m/z*) 358 (M<sup>+</sup>, 7.08), 231 (100); Elemental analysis calcd for C<sub>16</sub>H<sub>23</sub>IO: C, 53.64, H, 6.47; Found: C, 53.67, H, 6.47.

**(6) 4-Iodo-4-(*p*-methylphenyl)-3-(*n*-pentyl)-3(*Z*)-buten-2-ol (**Z-4e**)**

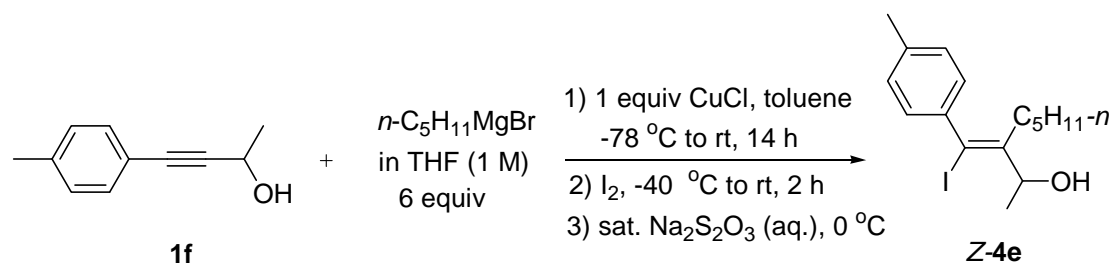

The reaction of **1f** (0.0806 g, 0.50 mmol), CuCl (0.0498 g, 0.50 mmol, 1 equiv), 0.75 mL of toluene, a solution of *n*-C<sub>5</sub>H<sub>11</sub>MgBr in THF (3 mL, 1 M, 3 mmol, 6 equiv), and I<sub>2</sub> (0.7532 g, 3.0 mmol, 6 equiv) afforded **Z-4e** (0.1191 g, 66%): Solid: m.p. 52.1-52.8 °C (hexane/ethyl acetate); <sup>1</sup>H NMR (400 MHz, CDCl<sub>3</sub>) δ 7.15-7.07 (m, 4 H), 4.90 (q, *J* = 6.5 Hz, 1 H), 2.34 (s, 3 H), 2.21-1.99 (m, 2 H), 1.93 (bs, 1 H), 1.43-1.25 (m, 5 H), 1.18-1.00 (m, 4 H), 0.75 (t, *J* = 6.9 Hz, 3 H); <sup>13</sup>C NMR (CDCl<sub>3</sub>, 100 MHz) δ 149.1, 141.8, 137.3, 128.9, 128.0, 96.5, 77.1, 31.8, 29.8, 28.8, 22.0, 21.2,



13.8; IR (KBr,  $\text{cm}^{-1}$ ) 3373, 3022, 2956, 2927, 2869, 1603, 1570, 1506, 1456, 1404, 1367, 1262, 1224, 1180, 1106, 1059, 1021; MS ( $m/z$ ) 358 ( $M^+$ , 0.50), 341 ( $(M^+-\text{OH})$ , 1.83), 105 (100); HRMS calcd for  $\text{C}_{16}\text{H}_{23}\text{OI}$  ( $M^+$ ): 358.0794, found: 358.0780.

**(7) 4-Iodo-4-(*p*-methoxyphenyl)-3-(*n*-pentyl)-3(*Z*)-buten-2-ol (Z-4f)**

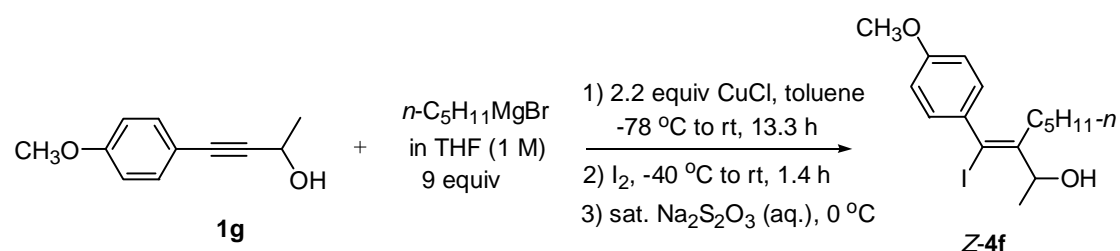

The reaction of **1g** (0.1591 g, 0.90 mmol), CuCl (0.1966 g, 2.0 mmol, 2.2 equiv), 1.5 mL of toluene, a solution of  $n\text{-C}_5\text{H}_{11}\text{MgBr}$  in THF (8 mL, 1 M, 8 mmol, 9 equiv), and a solution of  $\text{I}_2$  (2.0013 g, 7.9 mmol, 9 equiv) in THF (7 mL) afforded **Z-4f** (0.1907 g, 56%): Liquid;  $^1\text{H}$  NMR (300 MHz,  $\text{CDCl}_3$ )  $\delta$  7.16-7.11 (m, 2 H), 6.87-6.81 (m, 2 H), 4.90 (q,  $J = 6.5$  Hz, 1 H), 3.81 (s, 3 H), 2.22-2.00 (m, 3 H), 1.42-1.25 (m, 5 H), 1.18-1.00 (m, 4 H), 0.76 (t,  $J = 6.9$  Hz, 3 H);  $^{13}\text{C}$  NMR ( $\text{CDCl}_3$ , 75 MHz)  $\delta$  158.6, 149.2, 137.1, 129.4, 113.5, 96.4, 77.1, 55.2, 31.8, 29.8, 28.8, 22.0, 21.1, 13.8; IR (neat,  $\text{cm}^{-1}$ ) 3440, 2956, 2869, 1602, 1574, 1505, 1464, 1441, 1366, 1288, 1247, 1173, 1106, 1034; MS ( $m/z$ ) 374 ( $M^+$ , 0.80), 121 (100); Elemental analysis calcd for  $\text{C}_{16}\text{H}_{23}\text{O}_2\text{I}$ : C, 51.35, H, 6.19; Found: C, 51.31, H, 6.22.

**(8) 1-Iodo-2-(*n*-pentyl)-1-phenyl-1(*Z*)-octen-3-ol (Z-4g)**

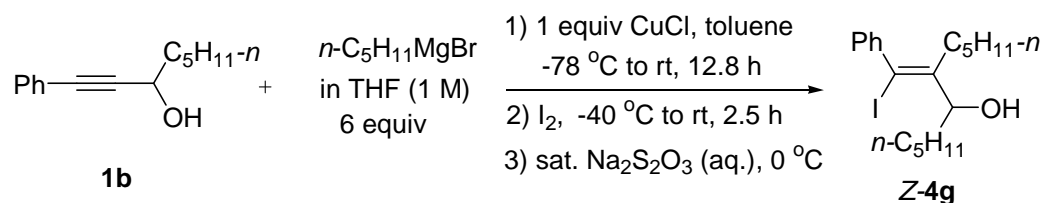

The reaction of **1b** (0.2106 g, 1.0 mmol), CuCl (0.1038 g, 1.0 mmol, 1 equiv), 1.5 mL of toluene, a solution of  $n\text{-C}_5\text{H}_{11}\text{MgBr}$  in THF (6 mL, 1 M, 6 mmol, 6 equiv),

and a solution of I<sub>2</sub> (1.5382 g, 6.1 mmol, 6 equiv) in THF (5 mL) afforded **Z-4g** (0.1304 g, 31%): Liquid; <sup>1</sup>H NMR (300 MHz, CDCl<sub>3</sub>) δ 7.34-7.27 (m, 2 H), 7.25-7.17 (m, 3 H), 4.72 (t, *J* = 6.6 Hz, 1 H), 2.20-1.96 (m, 3 H), 1.71-1.50 (m, 2 H), 1.48-1.20 (m, 8 H), 1.14-0.97 (m, 4 H), 0.96-0.88 (m, 3 H), 0.72 (t, *J* = 6.9 Hz, 3 H); <sup>13</sup>C NMR (CDCl<sub>3</sub>, 75 MHz) δ 148.9, 144.6, 128.1, 128.0, 127.5, 96.7, 80.9, 35.3, 31.8, 31.7, 29.7, 28.9, 25.7, 22.6, 21.9, 14.1, 13.8; IR (neat, cm<sup>-1</sup>) 3396, 3057, 2955, 2929, 2859, 1620, 1592, 1487, 1462, 1378, 1304, 1215, 1116, 1029; MS (*m/z*) 400 (M<sup>+</sup>, 0.49), 91 (100); Elemental analysis calcd for C<sub>19</sub>H<sub>29</sub>OI: C, 57.00, H, 7.30; Found: C, 57.00, H, 7.32.

**(9) 3-Ethyl-4-iodo-4-phenyl-3(Z)-buten-2-ol (Z-4h)**

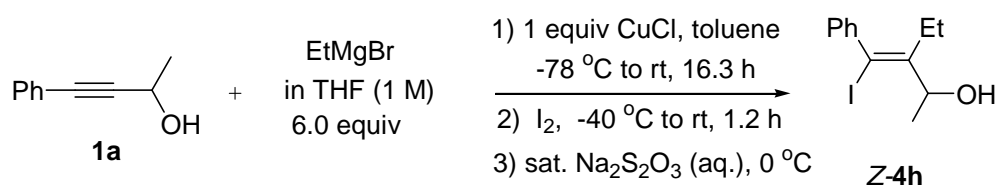

The reaction of **1a** (0.1440 g, 0.99 mmol), CuCl (0.1008 g, 1.0 mmol, 1 equiv), 1.5 mL of toluene, a solution of EtMgBr in THF (6 mL, 1 M, 6 mmol, 6 equiv), and a solution of I<sub>2</sub> (1.5325 g, 6.0 mmol, 6 equiv) in THF (5 mL) afforded **Z-4h** (0.2452 g, 82%): Solid: m.p. 100.2-101.0 °C (hexane/ethyl acetate); <sup>1</sup>H NMR (300 MHz, CDCl<sub>3</sub>) δ 7.36-7.29 (m, 2 H), 7.27-7.18 (m, 3 H), 4.98-4.89 (m, 1 H), 2.36-2.07 (m, 3 H), 1.41 (d, *J* = 6.6 Hz, 3 H), 0.92 (t, *J* = 7.5 Hz, 3 H); <sup>13</sup>C NMR (CDCl<sub>3</sub>, 75 MHz) δ 150.3, 144.4, 128.2, 128.0, 127.5, 95.9, 77.0, 21.9, 21.2, 15.0; IR (KBr, cm<sup>-1</sup>) 3318, 3052, 2976, 2967, 2930, 2870, 1615, 1576, 1485, 1440, 1373, 1367, 1342, 1288, 1218, 1184, 1103, 1072, 1052, 1015; MS (*m/z*) 302 (M<sup>+</sup>, 2.81), 131 (100); Elemental analysis calcd for C<sub>12</sub>H<sub>15</sub>OI: C, 47.70, H, 5.00; Found: C, 47.73, H, 5.01.

**(10) 4-Iodo-3-isopropyl-4-phenyl-3(Z)-buten-2-ol (Z-4i)**

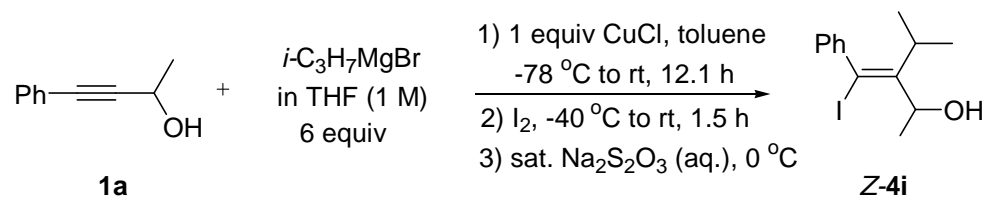

The reaction of **1a** (0.1426 g, 0.98 mmol), CuCl (0.1041 g, 1.1 mmol, 1 equiv), 1.5 mL of toluene, a solution of  $i\text{-C}_3\text{H}_7\text{MgBr}$  in THF (6 mL, 1 M, 6 mmol, 6 equiv), and a solution of  $\text{I}_2$  (1.5432 g, 6.1 mmol, 6 equiv) in THF (5 mL) afforded **Z-4i** (0.2575 g, 83%): Solid: m.p. 88.7-89.2 °C (hexane/ethyl acetate);  $^1\text{H}$  NMR (300 MHz,  $\text{CDCl}_3$ )  $\delta$  7.36-7.28 (m, 2 H), 7.27-7.15 (m, 3 H), 4.84 (q,  $J = 6.6$  Hz, 1 H), 2.88-2.73 (m, 1 H), 2.28 (bs, 1 H), 1.54 (d,  $J = 6.9$  Hz, 3 H), 1.05 (d,  $J = 6.9$  Hz, 3 H), 0.96 (d,  $J = 7.2$  Hz, 3 H);  $^{13}\text{C}$  NMR ( $\text{CDCl}_3$ , 75 MHz)  $\delta$  152.8, 145.4, 128.2, 127.9, 127.5, 94.6, 74.3, 31.8, 21.9, 21.8, 21.3; IR (KBr,  $\text{cm}^{-1}$ ) 3361, 2982, 2963, 2932, 2872, 1616, 1587, 1574, 1477, 1458, 1440, 1365, 1227, 1161, 1109, 1057; MS ( $m/z$ ) 316 ( $\text{M}^+$ , 0.80), 145 (100); Elemental analysis calcd for  $\text{C}_{13}\text{H}_{17}\text{IO}$ : C, 49.38, H, 5.42; Found: C, 49.40, H, 5.41.

**(11) 3-Allyl-4-iodo-4-phenyl-3(Z)-buten-2-ol (Z-4j)**

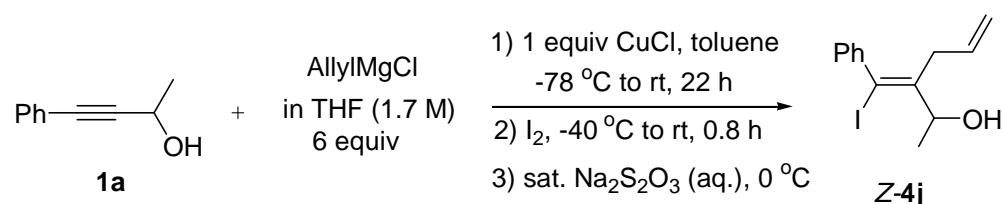

The reaction of **1a** (0.2973 g, 2.0 mmol), CuCl (0.2038 g, 2.1 mmol, 1 equiv), 3 mL of toluene, a solution of  $\text{CH}_2=\text{CHCH}_2\text{MgCl}$  in THF (7 mL, 1.7 M, 12 mmol, 6 equiv), and a solution of  $\text{I}_2$  (3.0215 g, 11.9 mmol, 6 equiv) in THF (10 mL) afforded **Z-4j** (0.3160 g, 49%): Solid: m.p. 47.7-49.9 °C (hexane/ethyl acetate);  $^1\text{H}$  NMR (300

MHz, CDCl<sub>3</sub>) δ 7.36-7.28 (m, 2 H), 7.27-7.18 (m, 3 H), 5.83-5.68 (m, 1 H), 5.01-4.88 (m, 3 H), 2.93 (qdt, *J* = 13.1, 6.3, and 1.7 Hz, 2 H), 2.23 (d, *J* = 3.3 Hz, 1 H), 1.39 (d, *J* = 6.6 Hz, 3 H); <sup>13</sup>C NMR (CDCl<sub>3</sub>, 75 MHz) δ 146.2, 144.1, 137.0, 128.2, 128.0, 127.8, 116.1, 97.0, 77.0, 32.8, 21.2; IR (KBr, cm<sup>-1</sup>) 3396, 3077, 3058, 2975, 2927, 1637, 1588, 1573, 1487, 1442, 1411, 1367, 1285, 1219, 1177, 1103, 1061, 1029, 1000; MS (*m/z*) 314 (M<sup>+</sup>, 5.86), 128 (100); Elemental analysis calcd for C<sub>13</sub>H<sub>15</sub>OI: C, 49.70, H, 4.81; Found: C, 49.66, H, 4.83.

**(12) 4-Iodo-3,4-diphenyl-3-buten-2(Z)-ol (Z-4k)**

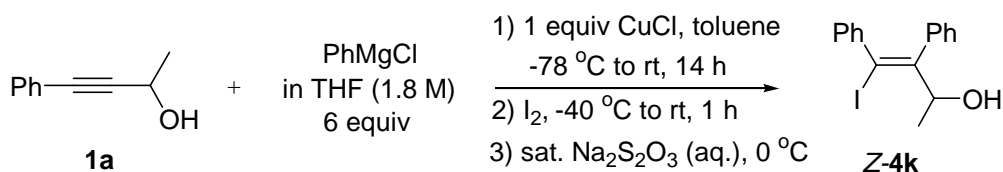

The reaction of **1a** (0.1467 g, 1.0 mmol), CuCl (0.1032 g, 1.0 mmol, 1 equiv), 1.5 mL of toluene, a solution of PhMgCl in THF (3.4 mL, 1.8 M, 6 mmol, 6 equiv), and a solution of I<sub>2</sub> (1.5237 g, 6.0 mmol, 6 equiv) in THF (5 mL) afforded **Z-4k** (0.2435 g, 69%): Solid: m.p. 99.1-100.8 °C (hexane/ethyl acetate); <sup>1</sup>H NMR (300 MHz, CDCl<sub>3</sub>) δ 7.19-7.10 (m, 3 H), 7.09-6.95 (m, 7 H), 5.18-5.08 (m, 1 H), 1.69 (bs, 1 H), 1.31 (d, *J* = 6.3 Hz, 3 H); <sup>13</sup>C NMR (CDCl<sub>3</sub>, 75 MHz) δ 150.2, 143.7, 135.7, 130.0, 129.1, 127.7, 127.5, 127.2, 127.0, 100.7, 76.6, 21.4; IR (KBr, cm<sup>-1</sup>) 3339, 2977, 1597, 1574, 1486, 1440, 1365, 1283, 1111, 1057; MS (*m/z*) 350 (M<sup>+</sup>, 5.03), 179 (100); Elemental analysis calcd for C<sub>16</sub>H<sub>15</sub>OI: C, 54.88, H, 4.32; Found: C, 54.87, H, 4.32.

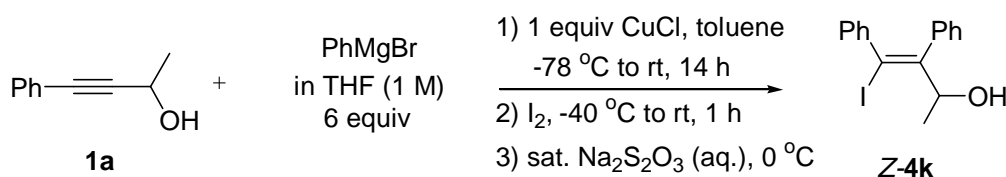

The reaction of **1a** (0.1449 g, 1 mmol), CuCl (0.1013 g, 1 mmol, 1 equiv), 1.5 mL of toluene, a solution of PhMgBr in THF (6 mL, 1 M, 6 mmol, 6 equiv), and a solution of I<sub>2</sub> (1.5245 g, 6 mmol, 6 equiv) in THF (5 mL) afforded **Z-4k** (0.2174 g, 63%). The data of the compound are the same as those described in the previous experiment.

**(13) 4-Iodo-3-(*p*-methylphenyl)-4-phenyl-3(*Z*)-buten-2-ol (**Z-4l**)**

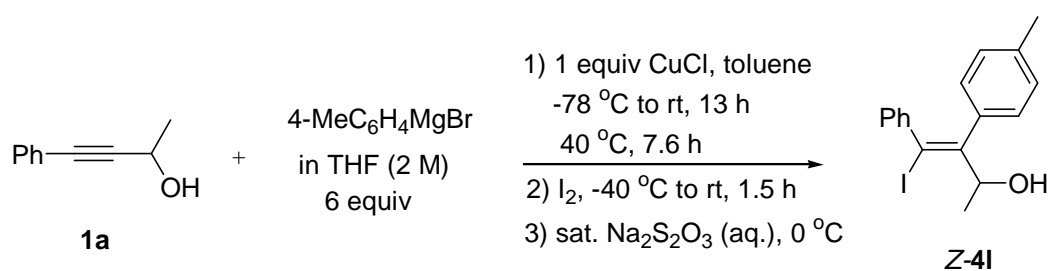

The reaction of **1a** (0.1473 g, 1.0 mmol), CuCl (0.0993 g, 1.0 mmol, 1 equiv), 1.5 mL of toluene, a solution of 4-MeC<sub>6</sub>H<sub>4</sub>MgBr in THF (3 mL, 2 M, 6 mmol, 6 equiv), and a solution of I<sub>2</sub> (1.5244 g, 6.0 mmol, 6 equiv) in THF (5 mL) afforded **Z-4l** (0.3030 g, 83%): Solid: m.p. 112.0-112.4 °C (hexane/ethyl acetate); <sup>1</sup>H NMR (300 MHz, CDCl<sub>3</sub>) δ 7.09-6.87 (m, 9 H), 5.16-5.05 (m, 1 H), 2.20 (s, 3 H), 1.88-1.74 (m, 1 H), 1.30 (d, *J* = 6.6 Hz, 3 H); <sup>13</sup>C NMR (CDCl<sub>3</sub>, 75 MHz) δ 150.1, 143.9, 136.7, 132.6, 129.8, 129.2, 128.5, 127.5, 127.1, 100.4, 76.6, 21.4, 21.1; IR (KBr, cm<sup>-1</sup>) 3406, 3078, 3024, 2973, 2922, 2866, 1609, 1590, 1576, 1509, 1487, 1442, 1403, 1367, 1329, 1263, 1200, 1184, 1113, 1055; MS (*m/z*) 365 ((M<sup>+</sup>+1), 1.97), 364 (M<sup>+</sup>, 9.73), 193 (100); Elemental analysis calcd for C<sub>17</sub>H<sub>17</sub>OI: C, 56.06, H, 4.70; Found: C, 56.10, H, 4.70.

**(14) 4-Iodo-3-(*p*-methoxyphenyl)-4-phenyl-3(*Z*)-buten-2-ol (**Z-4m**)**

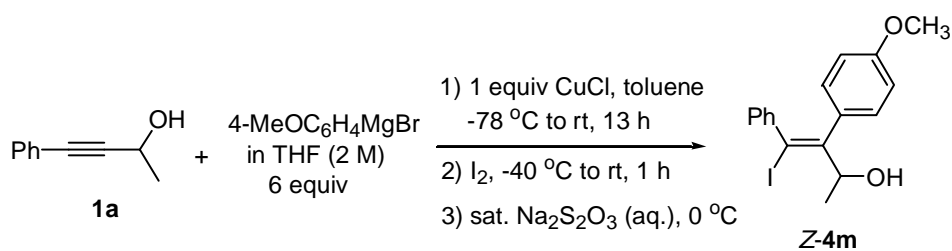

The reaction of **1a** (0.1442 g, 1.0 mmol), CuCl (0.1017 g, 1.0 mmol, 1 equiv), 1.5 mL of toluene, a solution of 4-MeOC<sub>6</sub>H<sub>4</sub>MgBr in THF (6 mL, 1 M, 6 mmol, 6 equiv), and a solution of I<sub>2</sub> (1.5241 g, 6.0 mmol, 6 equiv) in THF (5 mL) afforded **Z-4m** (0.2732 g, 73%): Solid: m.p. 97.1-98.3 °C (hexane/ethyl acetate); <sup>1</sup>H NMR (300 MHz, CDCl<sub>3</sub>) δ 7.11-6.99 (m, 5 H), 6.96-6.90 (m, 2 H), 6.70-6.64 (m, 2 H), 5.16-5.06 (m, 1 H), 3.70 (s, 3 H), 1.78 (d, *J* = 6.0 Hz, 1 H), 1.30 (d, *J* = 6.6 Hz, 3 H); <sup>13</sup>C NMR (CDCl<sub>3</sub>, 75 MHz) δ 158.5, 149.8, 144.0, 131.2, 129.3, 127.8, 127.6, 127.2, 113.3, 100.7, 76.6, 55.1, 21.5; IR (KBr, cm<sup>-1</sup>) 3424, 2971, 2930, 2835, 1605, 1573, 1508, 1488, 1463, 1441, 1366, 1287, 1246, 1177, 1112, 1056, 1031; MS (*m/z*) 380 (*M*<sup>+</sup>, 16.08), 209 (100); Elemental analysis calcd for C<sub>17</sub>H<sub>17</sub>O<sub>2</sub>I: C, 53.70, H, 4.51; Found: C, 53.77, H, 4.56.

## 6. Synthesis of 4-Bromo-3-(*n*-pentyl)-4-phenyl-3(*Z*)-buten-2-ol (**Z-6a**)

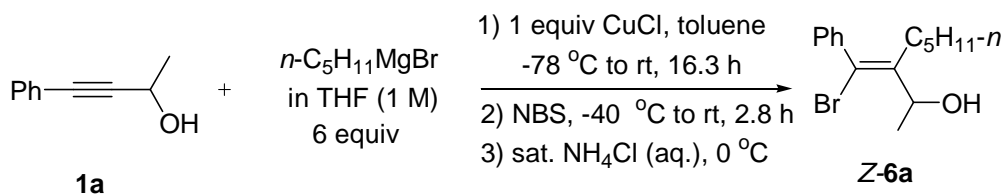

Following the procedure for the CuCl-mediated carbometallation of propargylic alcohols with Grignard reagents described above, the reaction was conducted using **1a** (0.1408 g, 0.96 mmol), CuCl (0.0998 g, 1.0 mmol, 1 equiv), 1.5 mL of toluene, and a solution of *n*-C<sub>5</sub>H<sub>11</sub>MgBr in THF (6 mL, 1 M, 6 mmol, 6 equiv). After complete conversion of the starting material as monitored by TLC, the reaction mixture was

quenched with NBS (1.1170 g, 6.3 mmol, 6.3 equiv) at -40 °C to afford *Z*-**6a** (0.1545 g, 54%): Solid: m.p. 47.9-48.8 °C (hexane); <sup>1</sup>H NMR (300 MHz, CDCl<sub>3</sub>) δ 7.39-7.24 (m, 5 H), 5.09 (q, *J* = 6.5 Hz, 1 H), 2.18-1.98 (m, 2 H), 1.91 (bs, 1 H), 1.45-1.30 (m, 5 H), 1.17-1.01 (m, 4 H), 0.76 (t, *J* = 6.8 Hz, 3 H); <sup>13</sup>C NMR (CDCl<sub>3</sub>, 75 MHz) δ 144.0, 140.8, 128.6, 128.2, 127.9, 117.8, 71.3, 31.8, 29.5, 29.3, 22.0, 21.2, 13.8; IR (KBr, cm<sup>-1</sup>) 3386, 3058, 2957, 2929, 2868, 1632, 1593, 1488, 1443, 1368, 1263, 1230, 1104, 1061, 1029; MS (*m/z*) 298 (M<sup>+</sup>(<sup>81</sup>Br), 0.83), 296 (M<sup>+</sup>(<sup>79</sup>Br), 0.90), 217 (100); Elemental analysis calcd for C<sub>15</sub>H<sub>21</sub>BrO: C, 60.61, H, 7.12; Found: C, 60.57, H, 7.15.

## **7. General Procedure for the CuCl-Mediated Carbometallation of Propargylic Alcohols with Grignard Reagents Followed by Allylation**

Following the procedure for the CuCl-mediated carbometallation of propargylic alcohols with Grignard reagents described above, the reaction was conducted using propargylic alcohol (1 mmol), CuCl (1.0 mmol, 1 equiv), 1.5 mL of toluene, and a solution of Grignard reagent in THF (6 equiv, 6 mmol). After complete conversion of the starting material as monitored by TLC, the reaction mixture was quenched by the dropwise addition of a solution of allyl bromide in 2 mL of THF at -40 °C, followed by warming up to rt naturally. The resulting mixture was treated with an aqueous solution of saturated NH<sub>4</sub>Cl at 0 °C, and extracted with Et<sub>2</sub>O. The combined organic layer was washed with 5 % HCl, sat. NaHCO<sub>3</sub> (aq.), brine, and dried over anhydrous Na<sub>2</sub>SO<sub>4</sub>. After filtration and evaporation, the NMR yield and ratio were determined by using 1,3,5-trimethylbenzene as the internal standard (35 μL, 0.25 mmol). Chromatography on silica gel (eluent: petroleum ether/ethyl acetate = 40/1~10/1) of

the crude product afforded the desired product.

**(1) 3-(*n*-Pentyl)-4-phenylhepta-3(*E*),6-dien-2-ol (*E*-7a)**

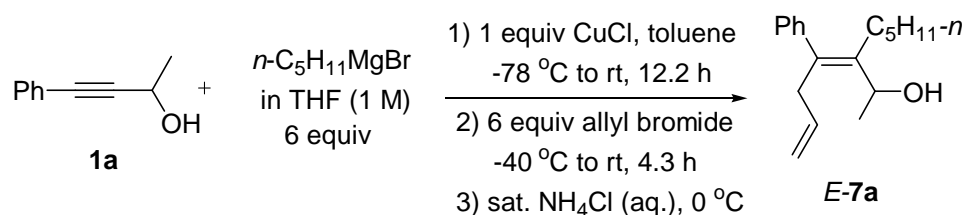

The reaction of **1a** (0.1499 g, 1.0 mmol), CuCl (0.1041 g, 1.1 mmol, 1 equiv), 1.5 mL of toluene, a solution of *n*-C<sub>5</sub>H<sub>11</sub>MgBr in THF (6 mL, 1 M, 6 mmol, 6 equiv), and a solution of allyl bromide (0.54 mL, *d* = 1.398 g/mL, 0.7549 g, 6.2 mmol, 6.2 equiv) in THF (2 mL) afforded **E-7a** (0.2250 g, 85%): Liquid; <sup>1</sup>H NMR (300 MHz, CDCl<sub>3</sub>) δ 7.34-7.27 (m, 2 H), 7.26-7.18 (m, 1 H), 7.11-7.07 (m, 2 H), 5.82-5.67 (m, 1 H), 5.05-4.89 (m, 3 H), 3.15 (qdt, *J* = 12.9, 6.3, and 1.5 Hz, 2 H), 2.02-1.85 (m, 2 H), 1.59 (bs, 1 H), 1.38 (d, *J* = 6.6 Hz, 3 H), 1.35-1.19 (m, 2 H), 1.15-0.96 (m, 4 H), 0.74 (t, *J* = 7.1 Hz, 3 H); <sup>13</sup>C NMR (CDCl<sub>3</sub>, 75 MHz) δ 143.4, 140.3, 136.0, 135.5, 128.4, 127.9, 126.2, 115.2, 67.6, 38.7, 32.2, 30.3, 28.4, 22.1, 22.0, 13.9; IR (neat, cm<sup>-1</sup>) 3382, 3077, 3057, 3019, 2956, 2929, 2870, 1636, 1599, 1491, 1456, 1441, 1368, 1283, 1106, 1177, 1072, 1056; MS (*m/z*) 258 (M<sup>+</sup>, 1.22), 130 (100); HRMS calcd for C<sub>18</sub>H<sub>26</sub>ONa (M<sup>+</sup> + Na): 281.1876, Found: 281.1870.

**(2) 3-Methyl-4-phenylhepta-3(*E*),6-dien-2-ol (*E*-7b)**

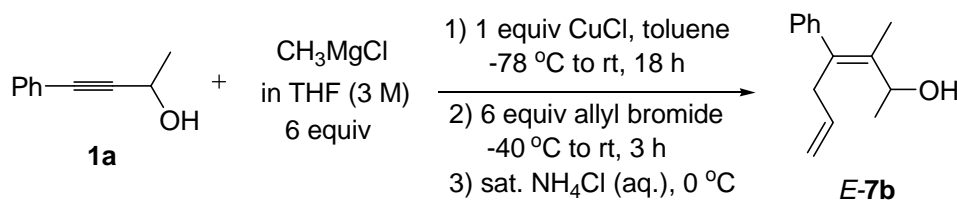

The reaction of **1a** (0.1475 g, 1.0 mmol), CuCl (0.0984 g, 0.99 mmol, 1 equiv), 1.5 mL of toluene, a solution of CH<sub>3</sub>MgCl in THF (2 mL, 3 M, 6 mmol, 6 equiv), and



a solution of allyl bromide (0.54 mL,  $d = 1.398$  g/mL, 0.7549 g, 6.2 mmol, 6.2 equiv) in THF (2 mL) afforded *E-7b* (0.1858 g, 91%): Liquid;  $^1\text{H}$  NMR (300 MHz,  $\text{CDCl}_3$ )  $\delta$  7.34-7.27 (m, 2 H), 7.25-7.18 (m, 1 H), 7.13-7.08 (m, 2 H), 5.82-5.68 (m, 1 H), 5.05-4.91 (m, 3 H), 3.26-3.06 (m, 2 H), 1.75 (bs, 1 H), 1.58 (s, 3 H), 1.34 (d,  $J = 6.3$  Hz, 3 H);  $^{13}\text{C}$  NMR ( $\text{CDCl}_3$ , 75 MHz)  $\delta$  143.3, 136.1, 135.6, 133.9, 128.5, 127.9, 126.2, 115.1, 66.7, 38.2, 21.3, 13.1; IR (neat,  $\text{cm}^{-1}$ ) 3364, 3077, 2975, 2926, 2862, 1636, 1601, 1492, 1442, 1405, 1376, 1290, 1091; MS ( $m/z$ ) 202 ( $M^+$ , 1.64), 130 (100); Elemental analysis calcd for  $\text{C}_{14}\text{H}_{18}\text{O}$ : C, 83.12, H, 8.97; Found: C, 83.10, H, 8.95.

**(3) 3-Isopropyl-4-phenylhepta-3(*E*),6-dien-2-ol (*E-7c*)**

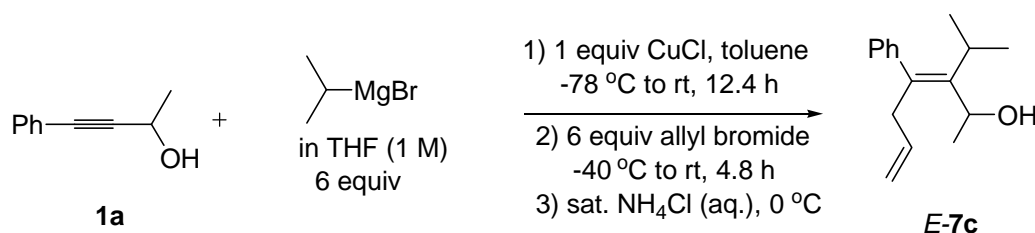

The reaction of **1a** (0.1465 g, 1.0 mmol), CuCl (0.0978 g, 0.99 mmol, 1 equiv), 1.5 mL of toluene, a solution of *i*- $\text{C}_3\text{H}_7\text{MgBr}$  in THF (6 mL, 1 M, 6 mmol, 6 equiv), and a solution of allyl bromide (0.7364 g, 6 mmol, 6 equiv) in THF (2 mL) afforded *E-7c* (0.1887 g, 82%): Liquid;  $^1\text{H}$  NMR (300 MHz,  $\text{CDCl}_3$ )  $\delta$  7.34-7.26 (m, 2 H), 7.25-7.18 (m, 1 H), 7.08-7.03 (m, 2 H), 5.76-5.61 (m, 1 H), 4.99-4.87 (m, 2 H), 4.65 (q,  $J = 6.8$  Hz, 1 H), 3.47-3.33 (m, 2 H), 2.48 (h,  $J = 6.9$  Hz, 1 H), 1.82 (bs, 1 H), 1.52 (dd,  $J = 6.6$  and  $0.6$  Hz, 3 H), 0.98 (dd,  $J = 6.9$  and  $0.3$  Hz, 3 H), 0.87 (d,  $J = 7.2$  Hz, 3 H);  $^{13}\text{C}$  NMR ( $\text{CDCl}_3$ , 75 MHz)  $\delta$  144.9, 143.2, 136.4, 136.3, 128.4, 127.8, 126.0, 115.4, 66.0, 39.4, 31.1, 23.7, 21.5, 21.2; IR (neat,  $\text{cm}^{-1}$ ) 3439, 3076, 2962, 2930, 2870, 1634, 1597, 1574, 1490, 1462, 1441, 1412, 1370, 1259, 1111, 1071, 1049; MS ( $m/z$ )

230 ( $M^+$ , 0.27), 212 ( $(M^+ - H_2O)$ , 5.75), 187 (100); Elemental analysis calcd for  $C_{16}H_{22}O$ : C, 83.43, H, 9.63; Found: C, 83.50, H, 9.63.

**(4) 3-Cyclohexyl-4-phenylhepta-3(*E*),6-dien-2-ol (*E*-7d)**

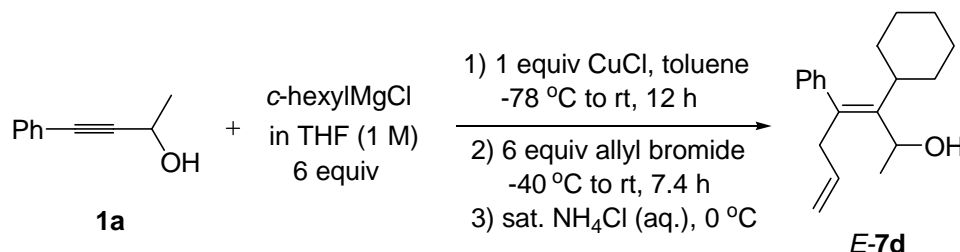

The reaction of **1a** (0.1446 g, 1.0 mmol), CuCl (0.1033 g, 1.0 mmol, 1 equiv), 1.5 mL of toluene, a solution of *c*- $C_6H_{11}MgCl$  in THF (6 mL, 1 M, 6 mmol, 6 equiv), and a solution of allyl bromide (0.7336 g, 6.1 mmol, 6.1 equiv) in THF (2 mL) afforded ***E*-7d** (0.2033 g, 76%): Liquid;  $^1H$  NMR (300 MHz,  $CDCl_3$ )  $\delta$  7.33-7.19 (m, 3 H), 7.06-7.01 (m, 2 H), 5.68 (ddt,  $J = 17.3, 10.2,$  and 4.8 Hz, 1 H), 4.99-4.88 (m, 2 H), 4.66 (q,  $J = 6.7$  Hz, 1 H), 3.39 (qdt,  $J = 13.2, 6.6,$  and 1.5 Hz, 2 H), 2.08 (tt,  $J = 11.8$  and 3.5 Hz, 1 H), 1.65-1.57 (m, 4 H), 1.55-1.38 (m, 7 H), 1.05-0.95 (m, 3 H);  $^{13}C$  NMR ( $CDCl_3$ , 75 MHz)  $\delta$  144.8, 143.3, 136.8, 136.4, 128.4, 127.8, 126.1, 115.4, 67.0, 42.3, 39.5, 31.6, 31.4, 26.4, 26.3, 25.9, 23.5; IR (neat,  $cm^{-1}$ ) 3416, 3076, 2927, 2851, 1635, 1597, 1490, 1448, 1369, 1257, 1094, 1071; MS ( $m/z$ ) 270 ( $M^+$ , 0.92), 187 (100); Elemental analysis calcd for  $C_{19}H_{26}O$ : C, 84.39, H, 9.69; Found: C, 84.44, H, 9.65.

**(5) 4-Phenyl-3-vinylhepta-3(*E*),6-dien-2-ol (*E*-7e)**

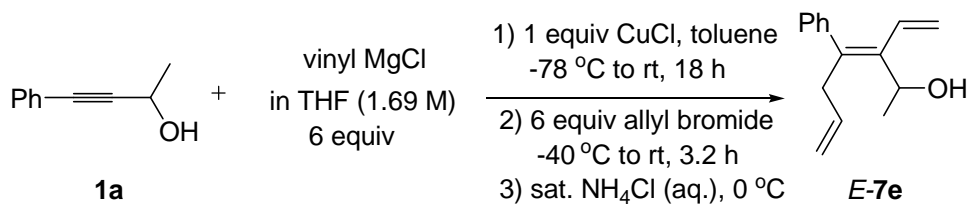

The reaction of **1a** (0.1465 g, 1.0 mmol), CuCl (0.0999 g, 1.0 mmol, 1 equiv),

1.5 mL of toluene, a solution of  $\text{CH}_2=\text{CHMgCl}$  in THF (3.55 mL, 1.69 M, 6 mmol, 6 equiv), and a solution of allyl bromide (0.54 mL,  $d = 1.398 \text{ g/mL}$ , 0.7549 g, 6.2 mmol, 6.2 equiv) in THF (2 mL) afforded *E-7e* (0.1652 g, 77%): Liquid;  $^1\text{H}$  NMR (300 MHz,  $\text{CDCl}_3$ )  $\delta$  7.35-7.20 (m, 3 H), 7.16-7.11 (m, 2 H), 6.11 (dd,  $J = 18$  and 11.7 Hz, 1 H), 5.82-5.68 (m, 1 H), 5.45 (dd,  $J = 18$  and 1.8 Hz, 1 H), 5.14-4.95 (m, 4 H), 3.38 (ddt,  $J = 15.3$ , 6.0, and 1.7 Hz, 1 H), 3.23 (ddt,  $J = 15.0$ , 6.0, and 1.7 Hz, 1 H), 2.04 (bs, 1 H), 1.52 (d,  $J = 6.6$  Hz, 3 H);  $^{13}\text{C}$  NMR ( $\text{CDCl}_3$ , 75 MHz)  $\delta$  142.6, 139.2, 137.8, 135.4, 133.7, 128.9, 127.9, 126.6, 115.7, 115.6, 67.0, 39.1, 22.2; IR (neat,  $\text{cm}^{-1}$ ) 3405, 3078, 2976, 2930, 1635, 1620, 1490, 1442, 1414, 1369, 1280, 1074; MS ( $m/z$ ) 214 ( $\text{M}^+$ , 2.26), 129 (100); Elemental analysis calcd for  $\text{C}_{15}\text{H}_{18}\text{O}$ : C, 84.07, H, 8.47; Found: C, 84.02, H, 8.50.

**(6) 6-Bromo-3-(*n*-pentyl)-4-phenylhepta-3(*E*),6-dien-2-ol (*E-7f*)**

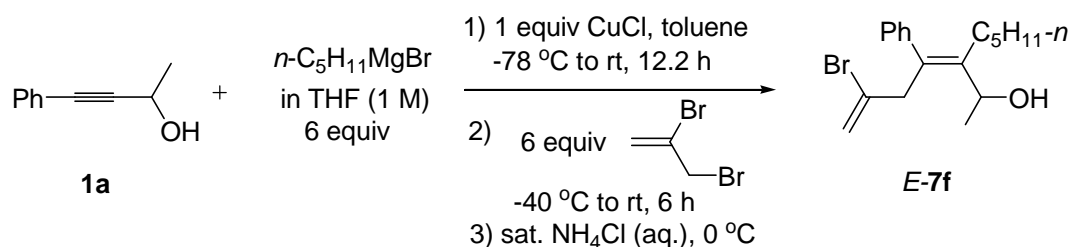

The reaction of **1a** (0.1455 g, 1.0 mmol),  $\text{CuCl}$  (0.0999 g, 1.0 mmol, 1 equiv), 1.5 mL of toluene, a solution of  $n\text{-C}_5\text{H}_{11}\text{MgBr}$  in THF (6 mL, 1 M, 6 mmol, 6 equiv), and a solution of 2-bromoallyl bromide (1.1931 g, 6.0 mmol, 6 equiv) in THF (2 mL) afforded *E-7f* (0.1612 g, 48%): Liquid;  $^1\text{H}$  NMR (300 MHz,  $\text{CDCl}_3$ )  $\delta$  7.34-7.19 (m, 3 H), 7.14-7.08 (m, 2 H), 5.41 (d,  $J = 1.8$  Hz, 1 H), 5.40 (d,  $J = 1.5$  Hz, 1 H), 4.93 (q,  $J = 6.5$  Hz, 1 H), 3.55 (s, 2 H), 2.05-1.92 (m, 2 H), 1.86 (bs, 1 H), 1.40 (d,  $J = 6.6$  Hz, 3 H), 1.36-1.20 (m, 2 H), 1.15-0.97 (m, 4 H), 0.73 (t,  $J = 6.9$  Hz, 3 H);  $^{13}\text{C}$  NMR

(CDCl<sub>3</sub>, 75 MHz)  $\delta$  143.1, 141.8, 133.0, 131.4, 128.5, 127.9, 126.5, 118.2, 67.4, 45.7, 32.2, 30.0, 28.5, 22.0, 21.7, 13.8; IR (neat, cm<sup>-1</sup>) 3419, 2956, 2929, 2870, 1626, 1599, 1576, 1491, 1465, 1441, 1377, 1262, 1106, 1056, 1023; MS (m/z) 338 (M<sup>+</sup>(<sup>81</sup>Br), 1.03), 336 (M<sup>+</sup>(<sup>79</sup>Br), 0.99), 129 (100); Elemental analysis calcd for C<sub>18</sub>H<sub>25</sub>BrO: C, 64.10, H, 7.47; Found: C, 64.16, H, 7.56.

**(7) 6-(*n*-Butyl)-3-(*n*-pentyl)-4-phenylhepta-3(*E*),6-dien-2-ol**

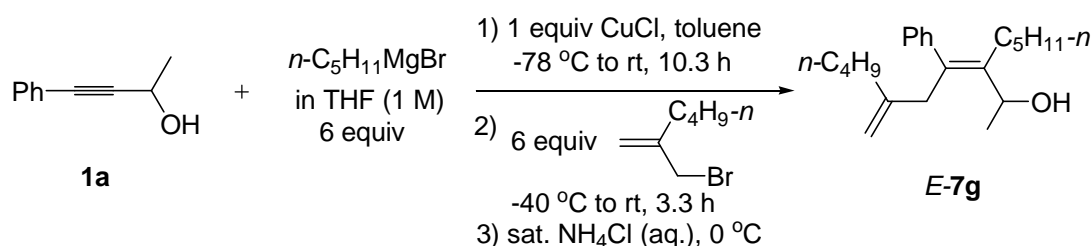

The reaction of **1a** (0.1439 g, 0.99 mmol), CuCl (0.1004 g, 1.0 mmol, 1 equiv), 1.5 mL of toluene, a solution of *n*-C<sub>5</sub>H<sub>11</sub>MgBr in THF (6 mL, 1 M, 6 mmol, 6 equiv), and a solution of 2-(*n*-butyl)allyl bromide (0.9897 g, 6.1 mmol, 6.1 equiv) in THF (2 mL) afforded **E-7g** (0.2433 g, 79%): Liquid; <sup>1</sup>H NMR (300 MHz, CDCl<sub>3</sub>)  $\delta$  7.31-7.24 (m, 2 H), 7.23-7.16 (m, 1 H), 7.14-7.09 (m, 2 H), 4.88-4.76 (m, 3 H), 3.15-3.00 (m, 2 H), 2.08-1.90 (m, 4 H), 1.52 (bs, 1 H), 1.40-1.20 (m, 9 H), 1.17-0.98 (m, 4 H), 0.85 (t, *J* = 7.2 Hz, 3 H), 0.74 (t, *J* = 6.9 Hz, 3 H); <sup>13</sup>C NMR (CDCl<sub>3</sub>, 75 MHz)  $\delta$  147.9, 143.8, 141.1, 135.2, 128.4, 127.8, 126.1, 109.9, 67.8, 40.9, 36.5, 32.3, 30.4, 29.8, 28.1, 22.4, 22.1, 21.7, 13.93, 13.88; IR (neat, cm<sup>-1</sup>) 3406, 2957, 2929, 2871, 1645, 1599, 1576, 1491, 1465, 1441, 1378, 1263, 1179, 1055; MS (m/z) 314 (M<sup>+</sup>, 4.03), 243 (100); Elemental analysis calcd for C<sub>22</sub>H<sub>34</sub>O: C, 84.02, H, 10.90; Found: C, 84.07, H, 10.91.

**8. General Procedure for the Pd-catalyzed Kumada-type Coupling Reaction**

Following the procedure for the CuCl-mediated carbometallation of propargylic

alcohols with Grignard reagents described above, the reaction was conducted using propargylic alcohol (1 mmol), CuCl (1.0 mmol, 1 equiv), 1.5 mL of toluene, and a solution of Grignard reagent in THF (6 equiv, 6 mmol). After complete conversion of the starting material as monitored by TLC, Pd(PPh<sub>3</sub>)<sub>4</sub> (2 mol %, 0.02 mmol) and a solution of aryl or vinyl iodide (6 equiv, 6 mmol) in THF (2 mL) were added sequentially at rt. The resulting mixture was then heated at 80 °C and monitored by TLC until the starting material disappeared. This mixture was then quenched with an aqueous solution of saturated NH<sub>4</sub>Cl, and extracted with Et<sub>2</sub>O (15 mL x 3). The combined organic layer was washed with 5 % HCl, sat. NaHCO<sub>3</sub> (aq.), brine, and dried over anhydrous Na<sub>2</sub>SO<sub>4</sub>. After filtration and evaporation, the NMR yield and ratio were determined by using 1,3,5-trimethylbenzene as the internal standard (35 μL, 0.25 mmol). Chromatography on silica gel (eluent: petroleum ether/ethyl acetate = 20/1~10/1) of the crude product afforded the desired product.

**(1) 3-(*n*-Pentyl)-4,4-diphenyl-3-buten-2-ol (**8a**)**

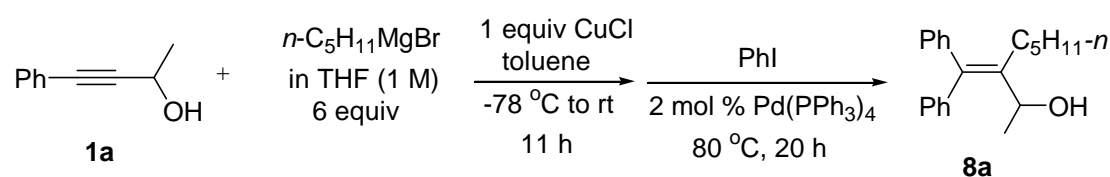

The reaction of **1a** (0.1458 g, 1.0 mmol), CuCl (0.0992 g, 1.0 mmol, 1 equiv), 1.5 mL of toluene, a solution of *n*-C<sub>5</sub>H<sub>11</sub>MgBr in THF (6 mL, 1 M, 6 mmol, 6 equiv), Pd(PPh<sub>3</sub>)<sub>4</sub> (0.0237 g, 0.02 mmol, 2 mol%), and PhI (1.2537 g, 6.2 mmol, 6 equiv)/THF (2 mL) afforded **8a** (0.2204 g, 75%). According to <sup>1</sup>H NMR analysis of the crude reaction mixture before separation, product **8a** was formed in 80% yield together with 7% of the protonolysis product **2a**. **8a**: Liquid; <sup>1</sup>H NMR (300 MHz,

CDCl<sub>3</sub>) δ 7.29-7.20 (m, 4 H), 7.19-7.10 (m, 6 H), 4.63 (q, *J* = 6.6 Hz, 1 H), 2.22-2.10 (m, 2 H), 1.77 (s, 1 H), 1.52-1.33 (m, 2 H), 1.30 (d, *J* = 6.6 Hz, 3 H), 1.18-1.03 (m, 4 H), 0.75 (t, *J* = 6.9 Hz, 3 H); <sup>13</sup>C NMR (CDCl<sub>3</sub>, 75 MHz) δ 142.6, 142.2, 141.5, 139.9, 128.8, 128.7, 128.1, 128.0, 126.4, 126.3, 68.3, 32.2, 30.2, 27.3, 22.0, 21.9, 13.8; IR (neat, cm<sup>-1</sup>) 3405, 3077, 3055, 3020, 2956, 2929, 2870, 1597, 1576, 1490, 1465, 1443, 1367, 1257, 1100, 1073, 1054, 1031, 1002; MS (*m/z*) 294 (M<sup>+</sup>, 2.19), 167 (100); Elemental analysis calcd for C<sub>21</sub>H<sub>26</sub>O: C, 85.67, H, 8.90; Found: C, 85.66, H, 8.83.

**(2) 4-(*m*-Methylphenyl)-3-(*n*-pentyl)-4-phenyl-3(*Z*)-buten-2-ol (*Z*-**8b**)**

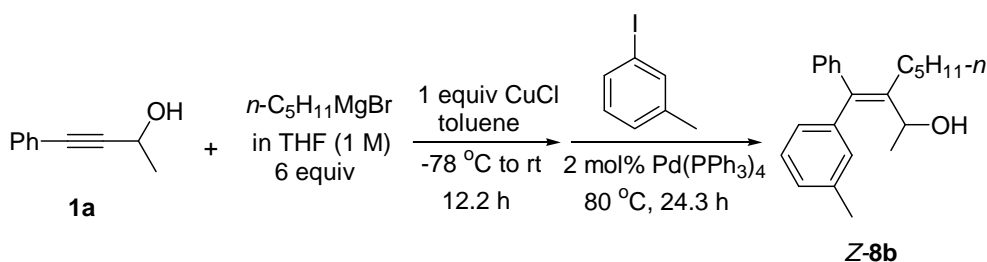

The reaction of **1a** (0.1421 g, 0.97 mmol), CuCl (0.1004 g, 1.0 mmol, 1 equiv), 1.5 mL of toluene, a solution of *n*-C<sub>5</sub>H<sub>11</sub>MgBr in THF (6 mL, 1 M, 6 mmol, 6 equiv), Pd(PPh<sub>3</sub>)<sub>4</sub> (0.0343 g, 0.03 mmol, 3 mol%), and 3-iodotoluene (1.3033 g, 6.0 mmol, 6 equiv)/THF (2 mL) afforded **Z-8b** (0.2234 g, 75%). According to <sup>1</sup>H NMR analysis of the crude reaction mixture before separation, product **Z-8b** was formed in 77% yield together with 6% of the protonolysis product **2a**. **Z-8b**: Liquid; <sup>1</sup>H NMR (300 MHz, CDCl<sub>3</sub>) δ 7.32-7.24 (m, 2 H), 7.22-7.14 (m, 4 H), 7.04-6.98 (m, 1 H), 6.97-6.92 (m, 2 H), 4.64 (q, *J* = 6.5 Hz, 1 H), 2.29 (s, 3 H), 2.20-2.13 (m, 2 H), 1.45-1.35 (m, 3 H), 1.31 (d, *J* = 6.6 Hz, 3 H), 1.19-1.05 (m, 4 H), 0.76 (t, *J* = 6.9 Hz, 3 H); <sup>13</sup>C NMR (CDCl<sub>3</sub>, 75 MHz) δ 142.7, 142.3, 141.3, 140.3, 137.7, 129.4, 128.7, 128.1, 128.0, 127.3, 126.3, 125.9, 68.5, 32.3, 30.3, 27.4, 22.1, 22.0, 21.4, 13.9; IR (neat, cm<sup>-1</sup>) 3418,

3054, 3020, 2956, 2928, 2868, 1599, 1581, 1490, 1461, 1443, 1377, 1258, 1098, 1054, 1004; MS (m/z) 308 ( $M^+$ , 2.05), 181 (100); HRMS calcd for  $C_{22}H_{28}O$  ( $M^+$ ): 308.2140, Found: 308.2141.

**(3) 4-(*p*-Methoxyphenyl)-3-(*n*-pentyl)-4-phenyl-3(*Z*)-buten-2-ol (*Z*-8c)**

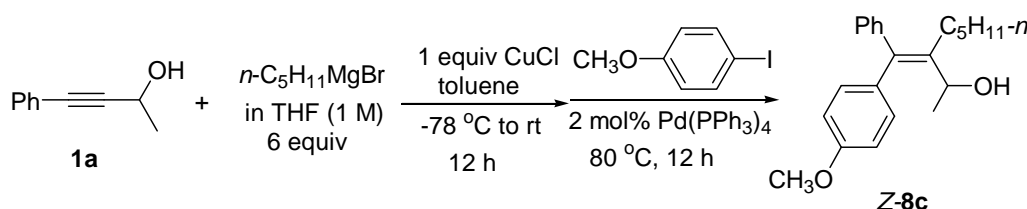

The reaction of **1a** (0.1467 g, 1.0 mmol), CuCl (0.1002 g, 1.0 mmol, 1 equiv), 1.5 mL of toluene, a solution of  $n\text{-C}_5\text{H}_{11}\text{MgBr}$  in THF (6 mL, 1 M, 6 mmol, 6 equiv),  $\text{Pd}(\text{PPh}_3)_4$  (0.0236 g, 0.02 mmol, 2 mol%), and 4-iodoanisole (1.3891 g, 5.9 mmol, 5.9 equiv)/THF (2 mL) afforded *Z*-8c (0.2412 g, 74%). According to  $^1\text{H}$  NMR analysis of the crude reaction mixture before separation, product *Z*-8c was formed in 80% yield together with 9% of the protonolysis product **2a**. *Z*-8c: Liquid;  $^1\text{H}$  NMR (300 MHz,  $\text{CDCl}_3$ )  $\delta$  7.31-7.24 (m, 2 H), 7.21-7.13 (m, 3 H), 7.08-7.02 (m, 2 H), 6.84-6.78 (m, 2 H), 4.69 (q,  $J = 6.4$  Hz, 1 H), 3.76 (s, 3 H), 2.24-2.08 (m, 2 H), 1.57-1.48 (m, 1 H), 1.47-1.25 (m, 5 H), 1.20-1.02 (m, 4 H), 0.76 (t,  $J = 6.8$  Hz, 3 H);  $^{13}\text{C}$  NMR ( $\text{CDCl}_3$ , 75 MHz)  $\delta$  158.2, 143.0, 141.2, 139.8, 134.7, 130.1, 128.8, 128.1, 126.3, 113.5, 68.5, 55.2, 32.3, 30.3, 27.5, 22.1, 22.0, 13.9; IR (neat,  $\text{cm}^{-1}$ ) 3422, 3055, 2955, 2931, 2870, 1606, 1574, 1508, 1463, 1442, 1367, 1283, 1244, 1175, 1103, 1072, 1037; MS (m/z) 324 ( $M^+$ , 2.03), 197 (100); HRMS calcd for  $C_{22}H_{28}O_2$  ( $M^+$ ): 324.2089, Found: 324.2088.

**(4) 4-(*p*-Chlorophenyl)-3-(*n*-pentyl)-4-phenyl-3(*Z*)-buten-2-ol (*Z*-8d)**

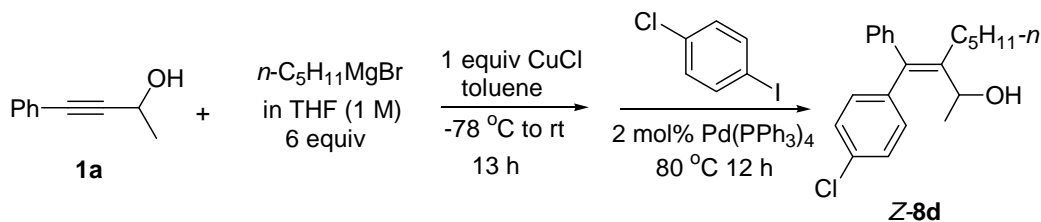

The reaction of **1a** (0.1450 g, 1.0 mmol), CuCl (0.1012 g, 1.0 mmol, 1 equiv), 1.5 mL of toluene, a solution of *n*-C<sub>5</sub>H<sub>11</sub>MgBr in THF (6 mL, 1 M, 6 mmol, 6 equiv), Pd(PPh<sub>3</sub>)<sub>4</sub> (0.0234 g, 0.02 mmol, 2 mol%), and 4-chloriodotoluene (1.4257 g, 6.0 mmol, 6 equiv) in THF (2 mL) afforded **Z-8d** (0.2269 g, 69%). According to <sup>1</sup>H NMR analysis of the crude reaction mixture before separation, product **Z-8d** was formed in 71% yield together with 10% of the protonolysis product **2a**. **Z-8d**: Liquid; <sup>1</sup>H NMR (300 MHz, CDCl<sub>3</sub>) δ 7.32-7.16 (m, 5 H), 7.16-7.05 (m, 4 H), 4.62 (q, *J* = 6.4 Hz, 1 H), 2.24-2.12 (m, 2 H), 1.46-1.30 (m, 6 H), 1.15-1.04 (m, 4 H), 0.76 (t, *J* = 6.9 Hz, 3 H); <sup>13</sup>C NMR (CDCl<sub>3</sub>, 75 MHz) δ 142.24, 142.19, 140.7, 138.9, 132.4, 130.3, 128.8, 128.4, 128.2, 126.6, 68.4, 32.3, 30.2, 27.4, 22.11, 22.06, 13.9; IR (neat, cm<sup>-1</sup>) 3405, 3056, 2956, 2929, 2868, 1596, 1488, 1464, 1443, 1395, 1376, 1259, 1192, 1090, 1055, 1015; MS (*m/z*) 330 (M<sup>+</sup>(<sup>37</sup>Cl), 0.37), 328 (M<sup>+</sup>(<sup>35</sup>Cl), 1.12), 201 (100); HRMS calcd for C<sub>21</sub>H<sub>25</sub><sup>35</sup>ClO (M<sup>+</sup>): 328.1594, Found: 328.1595.

**(5) 3-(*n*-Pentyl)-4-phenyl-3(*E*),5(*E*)-decadien-2-ol ((3*E*,5*E*)-8e)**

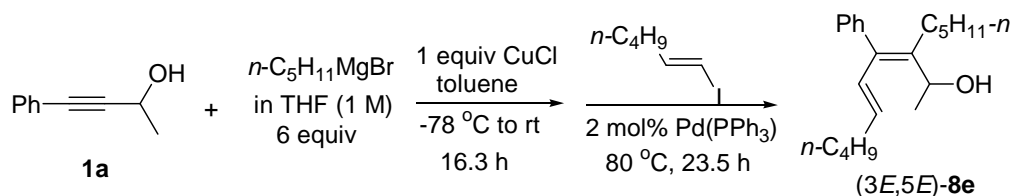

The reaction of **1a** (0.1446, 0.99 mmol), CuCl (0.1032 g, 1.0 mmol, 1 equiv), 1.5 mL of toluene, a solution of *n*-C<sub>5</sub>H<sub>11</sub>MgBr in THF (6 mL, 1 M, 6 mmol, 6 equiv), Pd(PPh<sub>3</sub>)<sub>4</sub> (0.0263 g, 0.02 mmol, 2 mol%), and 1(*E*)-hexenyl iodide (1.2556 g, 6.0



mmol, 6 equiv)/THF (2 mL) afforded (*3E,5E*)-**8e** (0.1431, 48%): Liquid; <sup>1</sup>H NMR (300 MHz, CDCl<sub>3</sub>) 7.37-7.20 (m, 3 H), 7.10-7.00 (m, 2 H), 6.71 (d, *J* = 15.3, 1 H), 5.12 (q, *J* = 6.6 Hz, 1 H), 5.05-4.94 (m, 1 H), 2.08-1.98 (m, 2 H), 1.92-1.80 (m, 2 H), 1.61 (bs, 1 H), 1.41 (d, *J* = 6.6 Hz, 3 H), 1.35-1.16 (m, 6 H), 1.12-0.95 (m, 4 H), 0.88-0.81 (m, 3 H), 0.73 (t, *J* = 6.9 Hz, 3 H); <sup>13</sup>C NMR (CDCl<sub>3</sub>, 75 MHz) δ 140.8, 140.3, 137.1, 135.0, 129.6, 128.2, 127.8, 126.2, 67.3, 33.0, 32.2, 31.5, 30.3, 29.4, 22.2, 22.1, 13.90, 13.86; IR (neat, cm<sup>-1</sup>) 3376, 3056, 3029, 2957, 2927, 2859, 1632, 1601, 1574, 1491, 1462, 1376, 1284, 1176, 1098, 1057, 1026; MS (*m/z*) 282 ((M<sup>+</sup>-H<sub>2</sub>O), 40.66), 169 (100); Elemental analysis calcd for C<sub>21</sub>H<sub>32</sub>O: C, 83.94, H, 10.73; Found: C, 83.84, H, 10.79.

### 9. Synthesis of 5-methyl-4-(*n*-pentyl)-3-phenyl-2(*5H*)-furanone (**9a**)

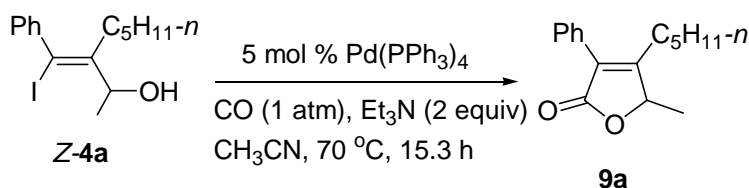

To a Schlenk tube were added Pd(PPh<sub>3</sub>)<sub>4</sub> (0.0242 g, 0.02 mmol, 5 mol%), **Z-4a** (0.1372 g, 0.40 mmol), Et<sub>3</sub>N (0.0828 g, 0.82 mmol, 2 equiv), and CH<sub>3</sub>CN (4 mL) at rt. This mixture was degassed using greeze-pump-thaw cycles with CO and then heated at 70 °C. After complete conversion of the starting material as monitored by TLC, the reaction mixture was quenched by H<sub>2</sub>O (5 mL) and extracted with Et<sub>2</sub>O (20 mL x 3). The combined organic layer was washed with 5 % HCl (10 mL), sat. NaHCO<sub>3</sub> (aq.) (10 mL), brine (10 mL), and dried over anhydrous Na<sub>2</sub>SO<sub>4</sub>. Chromatography on silica gel (eluent: petroleum ether/ethyl acetate = 20/1) of the crude product afforded **9a** (0.0656 g, 67%). Liquid; <sup>1</sup>H NMR (300 MHz, CDCl<sub>3</sub>) δ 7.47-7.32 (m, 5 H), 5.06 (q, *J*

= 6.7 Hz, 1 H), 2.77-2.65 (m, 1 H), 2.42-2.30 (m, 1 H), 1.60-1.40 (m, 5 H), 1.35-1.20 (m, 4 H), 0.91-0.82 (m, 3 H);  $^{13}\text{C}$  NMR ( $\text{CDCl}_3$ , 75 MHz)  $\delta$  172.6, 166.1, 130.0, 128.8, 128.3, 128.2, 126.4, 77.9, 31.6, 27.4, 26.7, 22.1, 18.3, 13.8; IR (neat,  $\text{cm}^{-1}$ ) 2954, 2931, 2866, 1752, 1656, 1601, 1493, 1446, 1376, 1322, 1150, 1100, 1062; MS (m/z) 244 ( $\text{M}^+$ , 58.66), 91 (100); Elemental analysis calcd for  $\text{C}_{16}\text{H}_{20}\text{O}_2$ : C, 78.65, H, 8.25; Found: C, 78.64, H, 8.26.

## References:

1. W. Parker, R. A. Raphael and D. I. Wilkinson, *J. Chem. Soc.*, 1958, 3871.
2. J. T. Caroline, M. Majid and J. R. Christopher, *Organometallics*, 2006, **25**, 2899.
3. M. C. Pacheco and V. Gouverneur, *Org. Lett.*, 2005, **7**, 1267.
4. D. A. Engel and G. B. Dudley, *Org. Lett.*, 2006, **8**, 4027.
5. Y. Kayaki, M. Yamamoto and T. Ikariya, *J. Org. Chem.*, 2007, **72**, 647.
6. S. Ma, H. Ren and Q. Wei, *J. Am. Chem. Soc.*, 2003, **125**, 4817.
7. K. Nakamura, K. Takenaka and A. Ohno, *Tetrahedron: Asymmetry*, 1998, **9**, 4429.
8. D. Chernyak, S. B. Gadamsetty and V. Gevorgyan, *Org. Lett.*, 2008, **10**, 2307.
9. M. Havránek and D. Dvořák, *J. Org. Chem.*, 2002, **67**, 2125.
10. D. Xu, Z. Li and S. Ma, *Tetrahedron Lett.*, 2003, **44**, 6343.
11. U. Kazmaier and F. L. Zumpe, *Eur. J. Org. Chem.*, 2001, 4067.

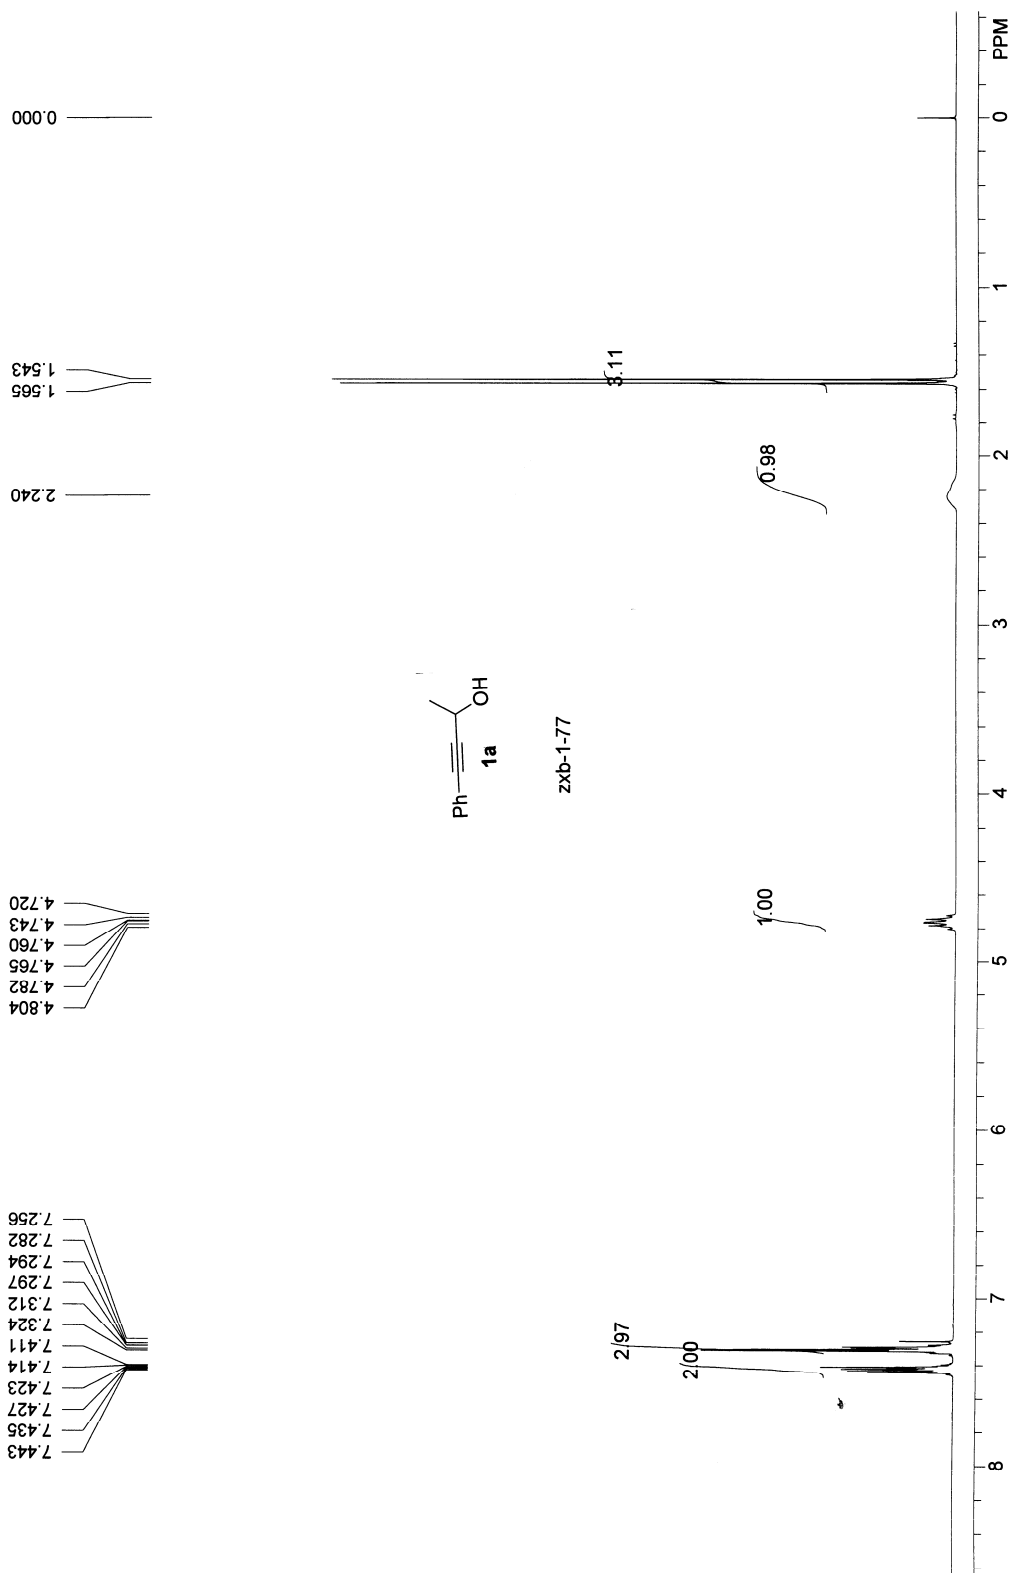

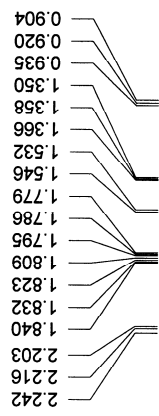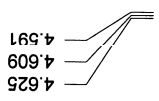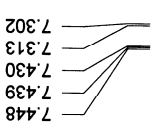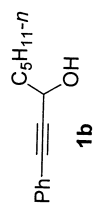

zxb-1-28-3

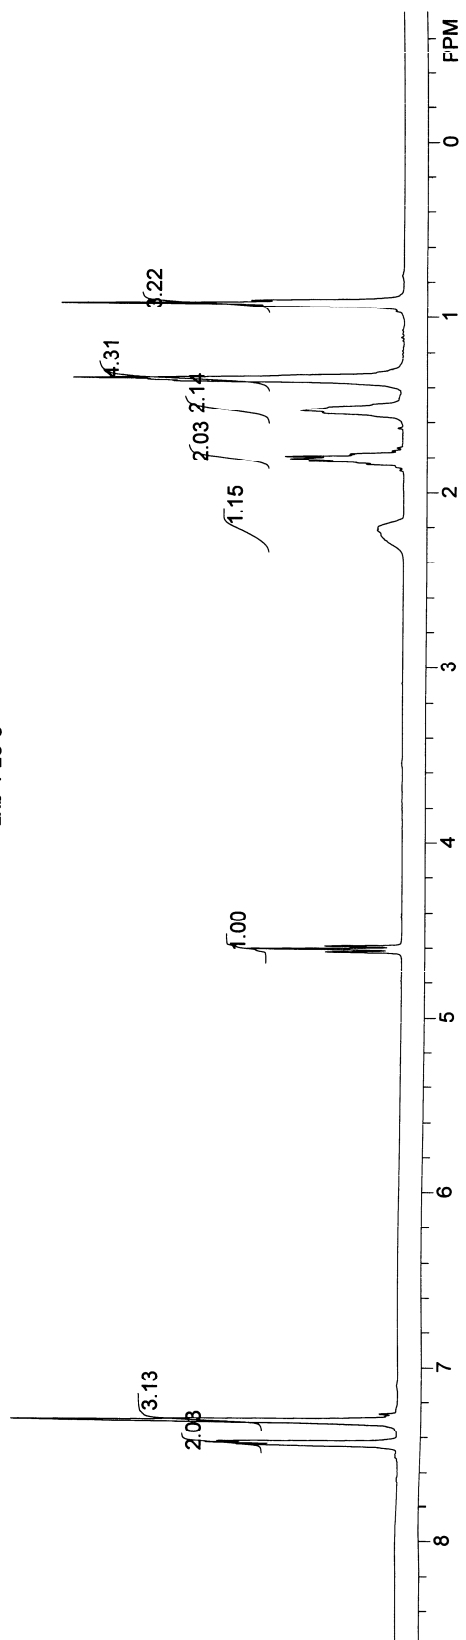

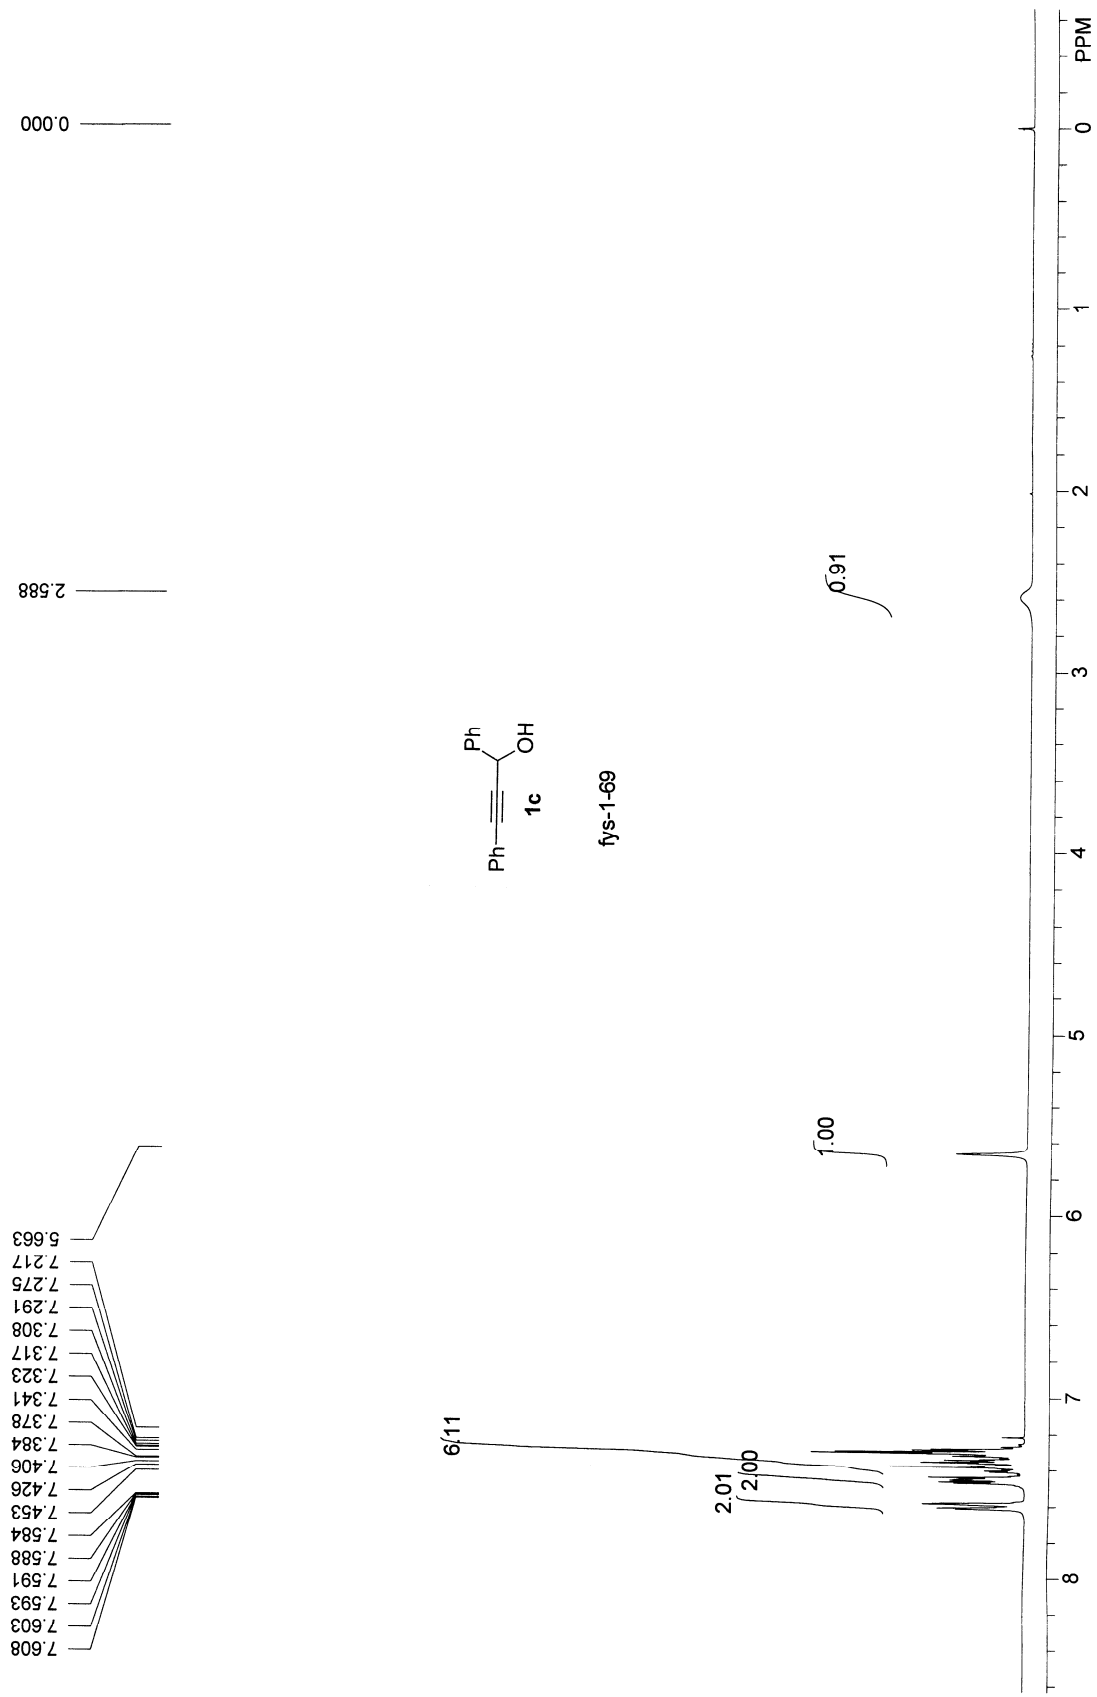

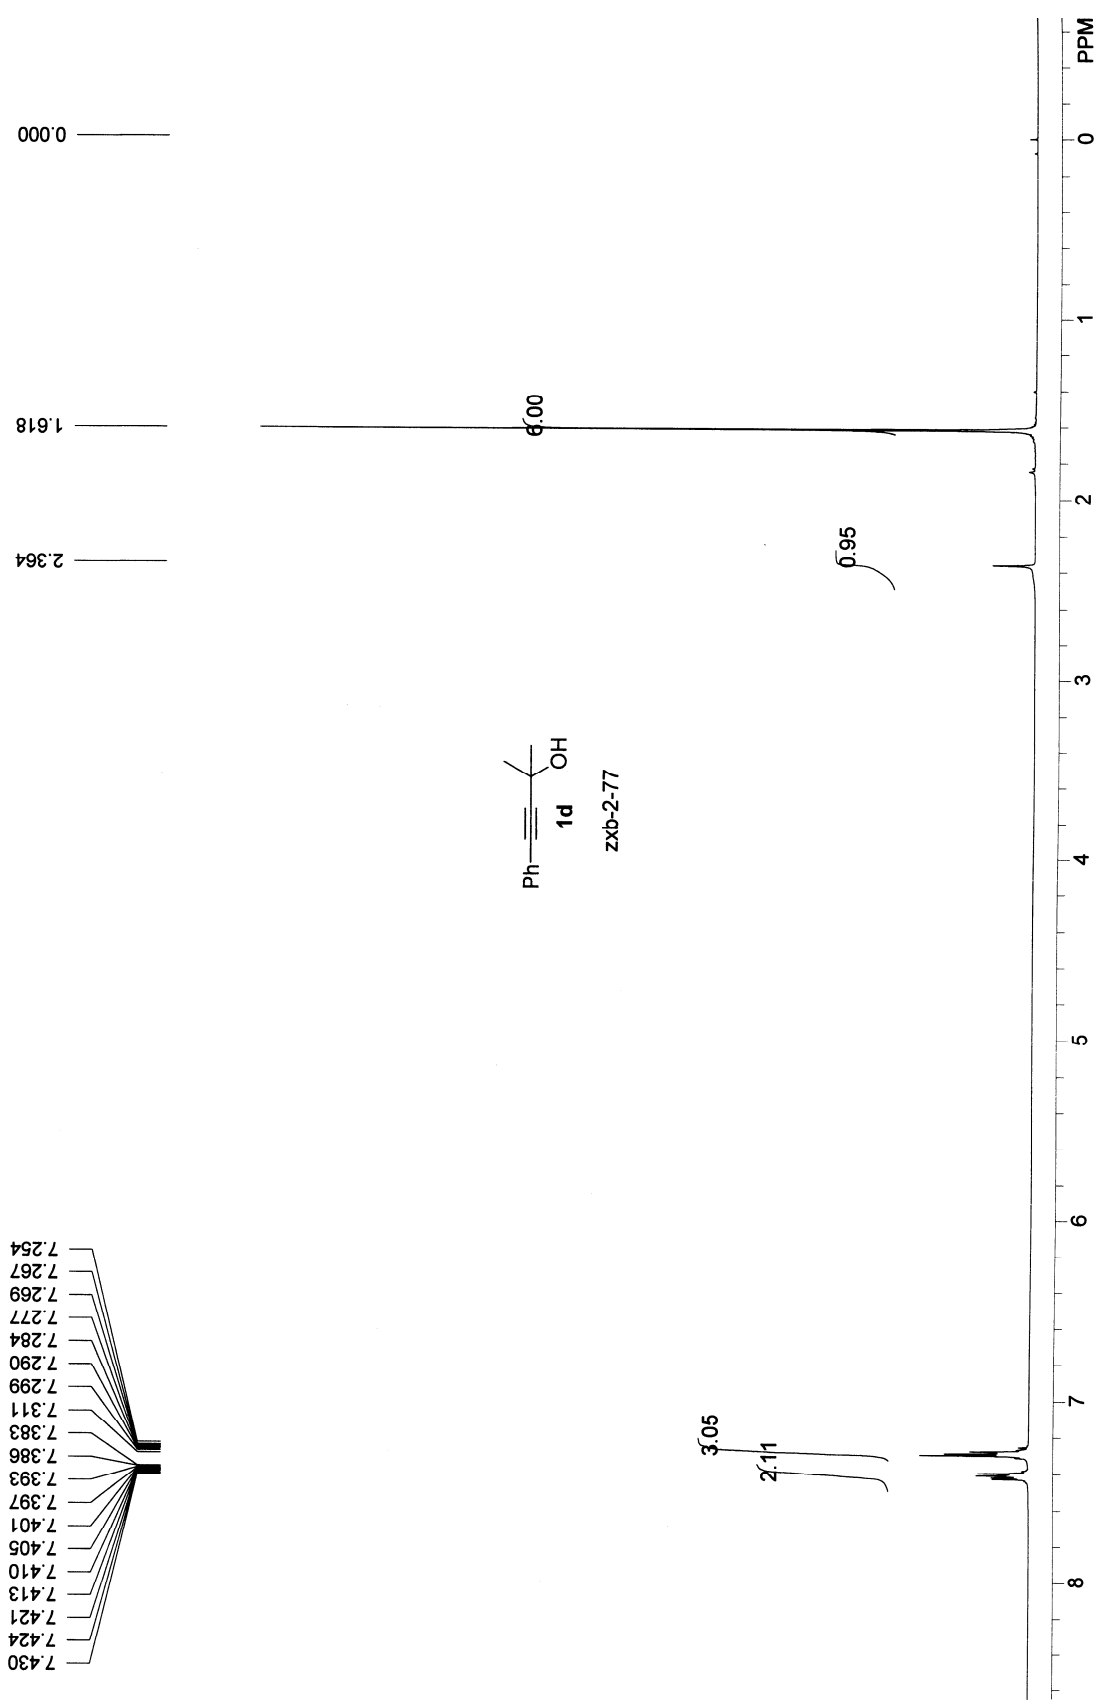

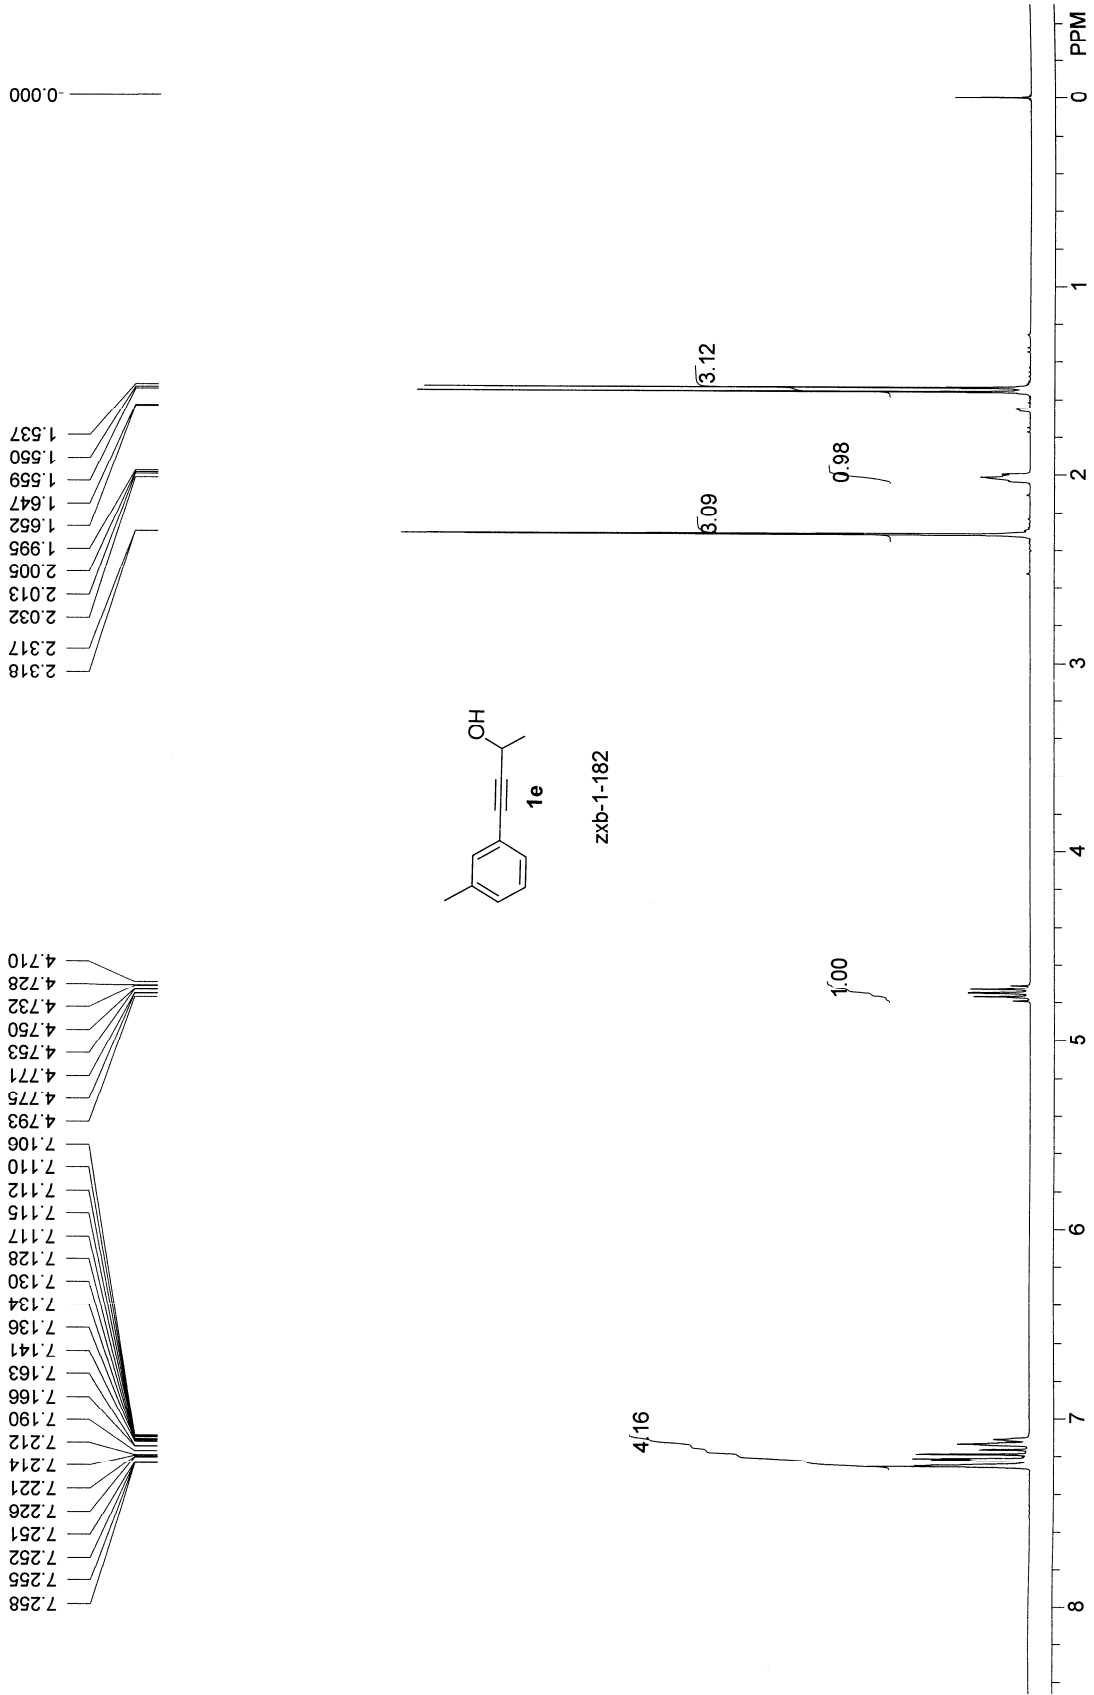



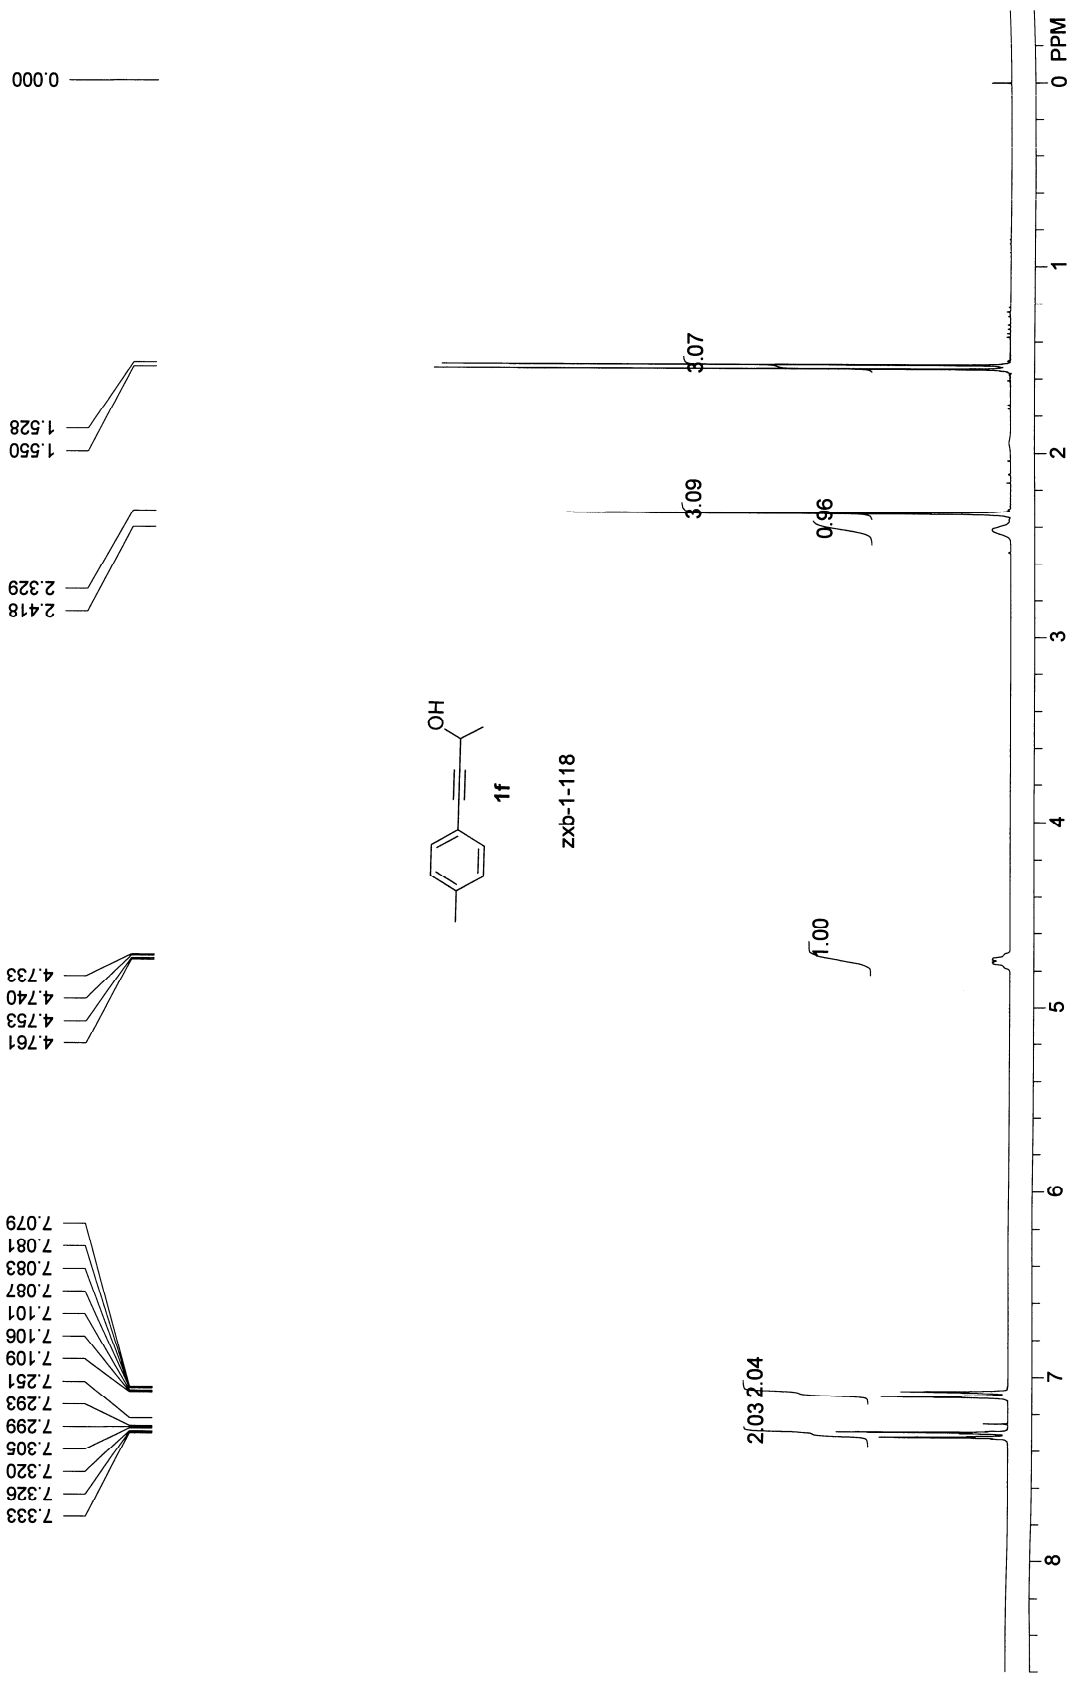

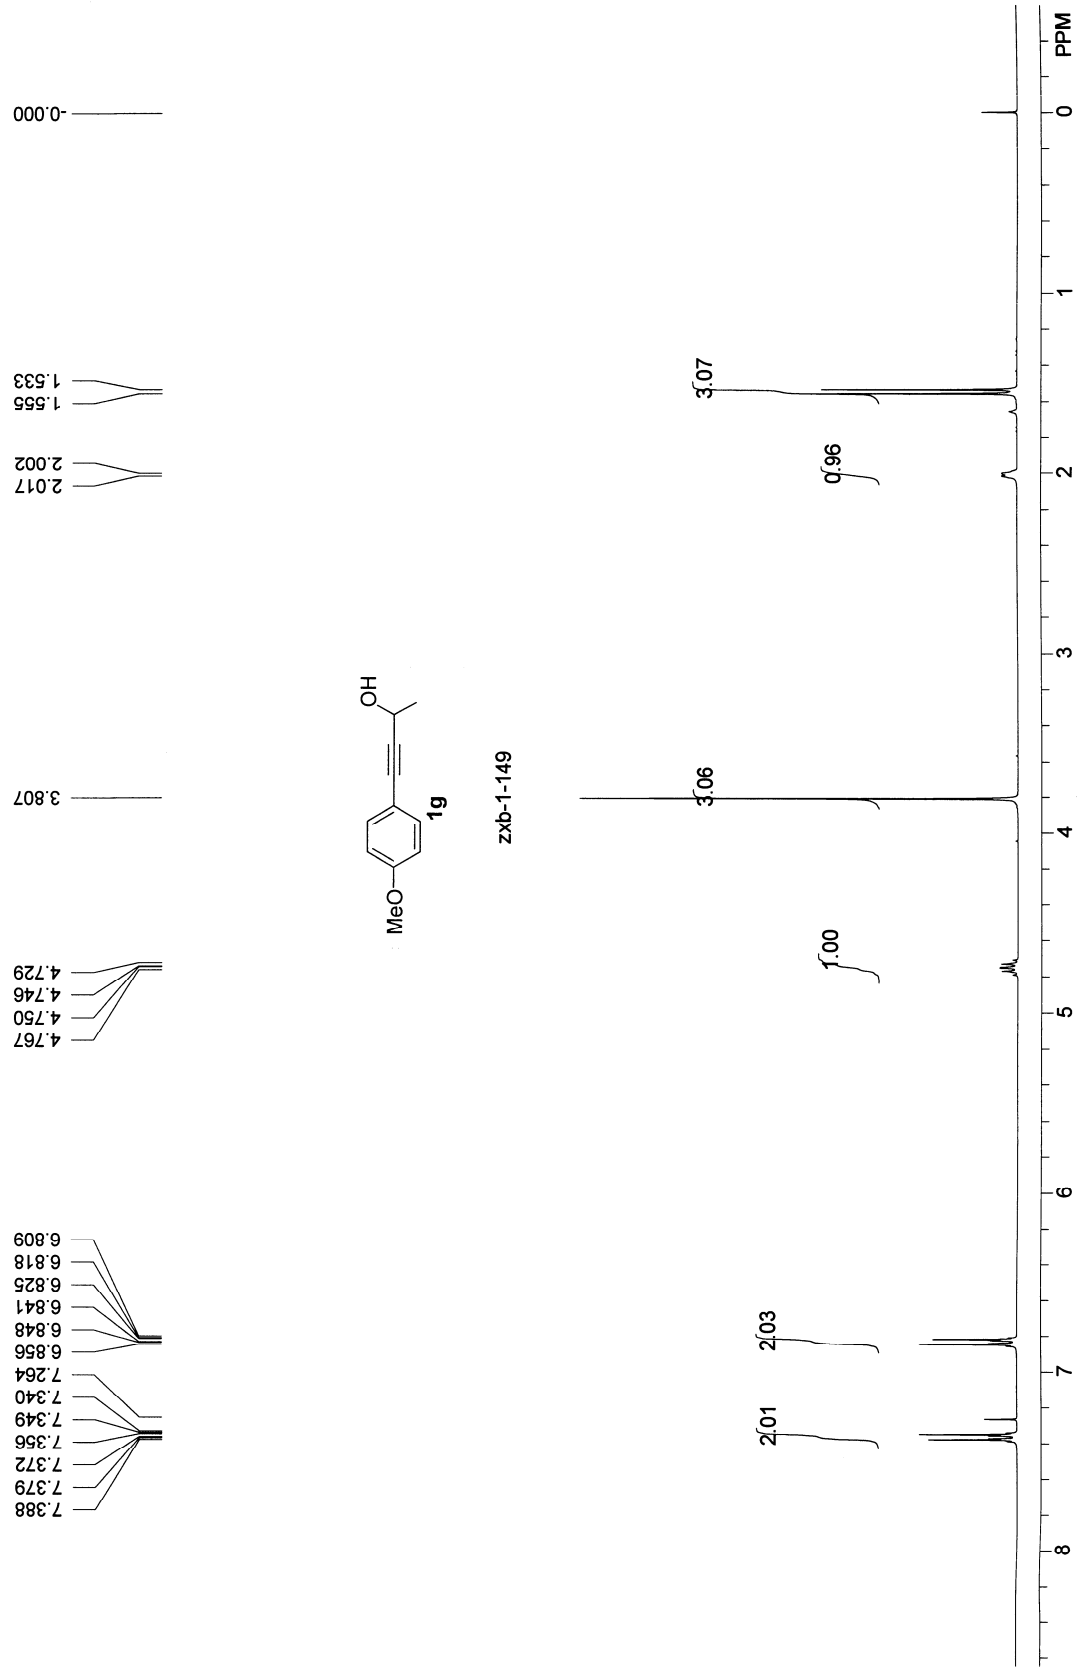

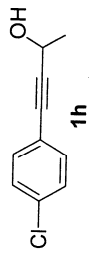

ZX00-1-91

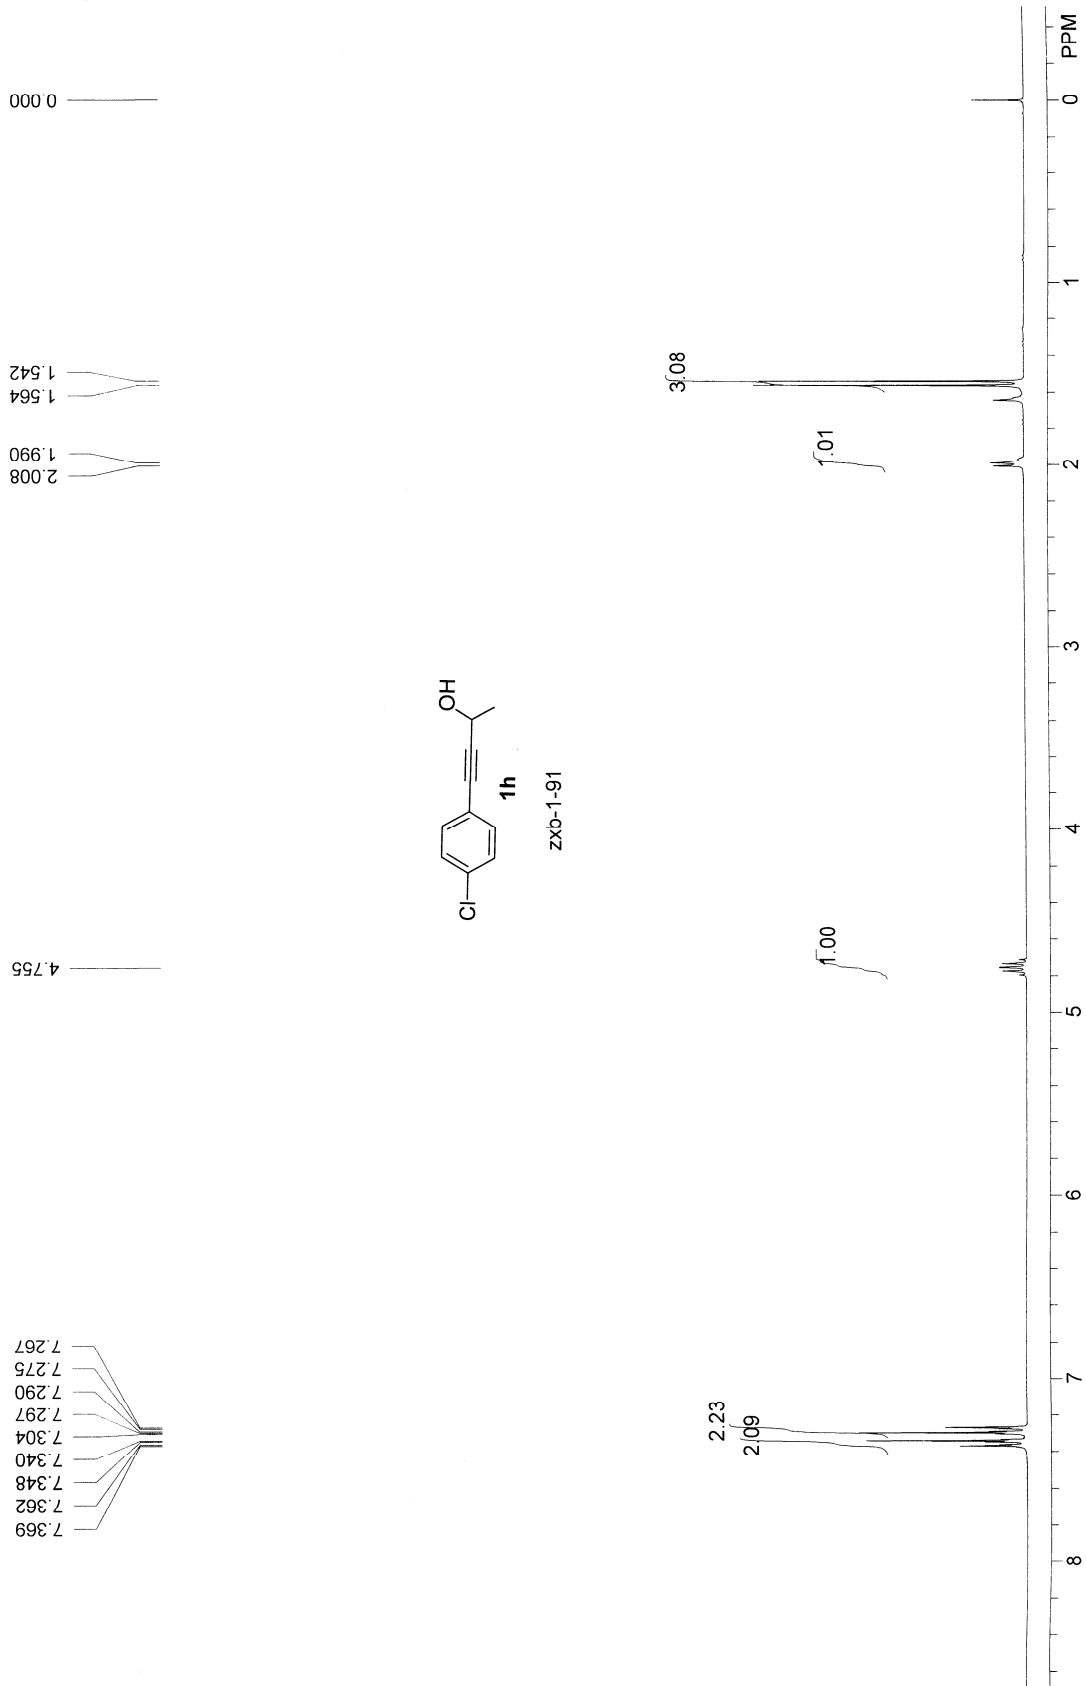

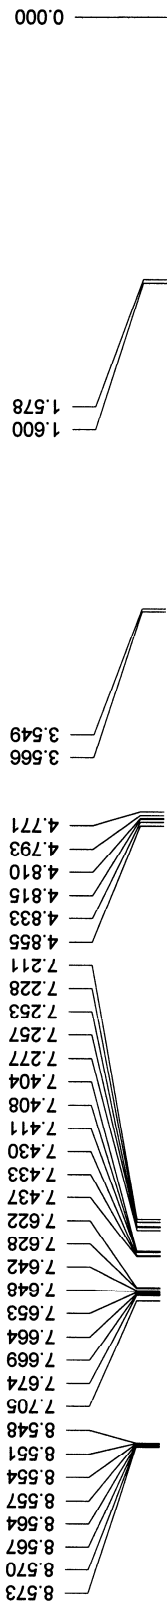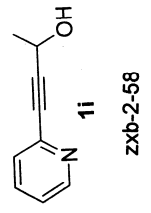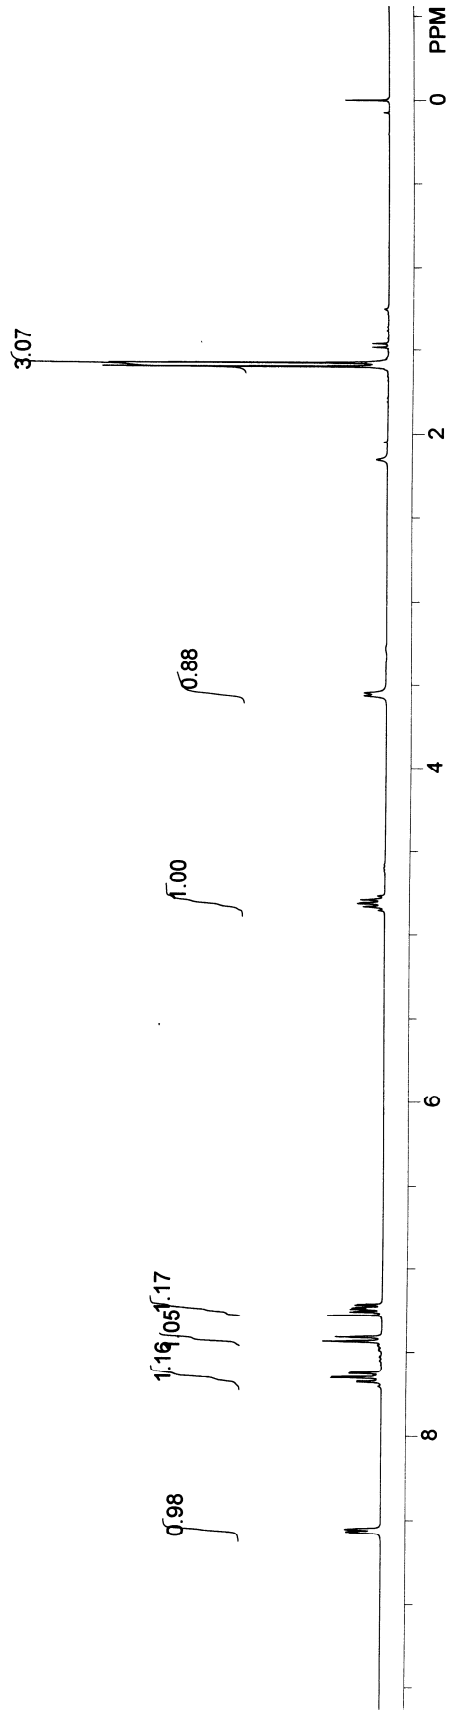

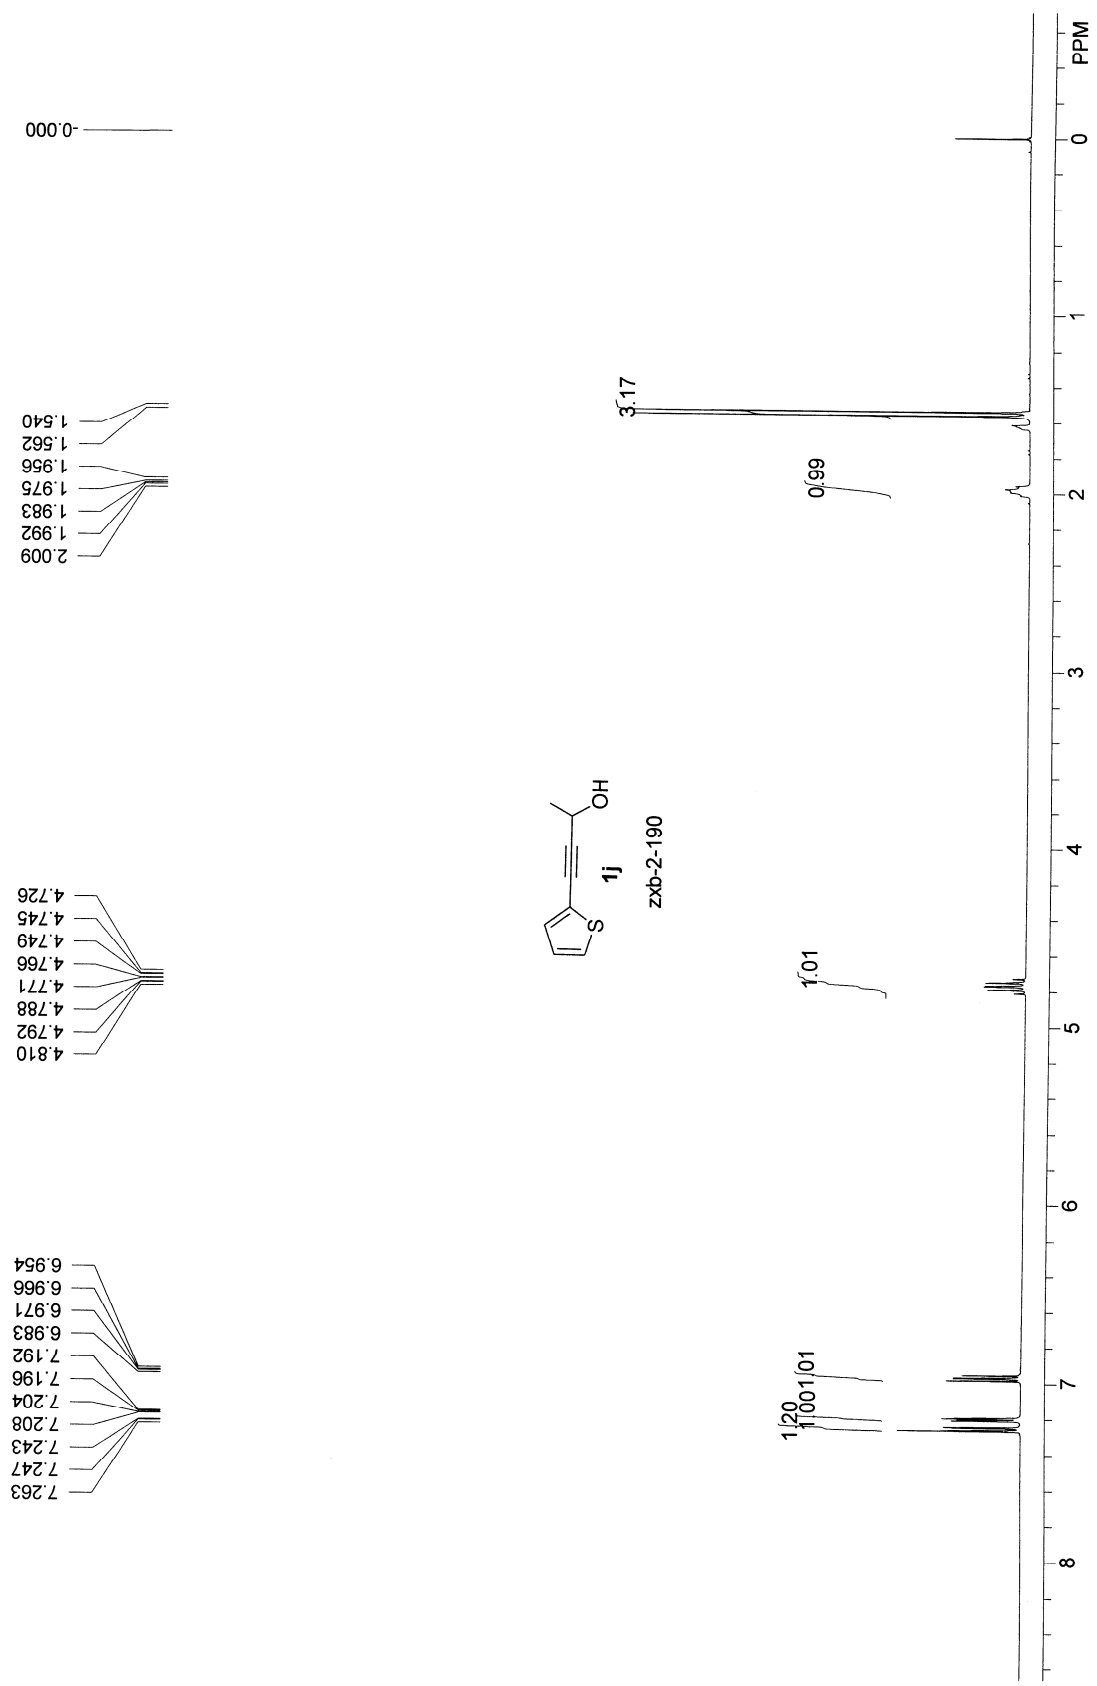

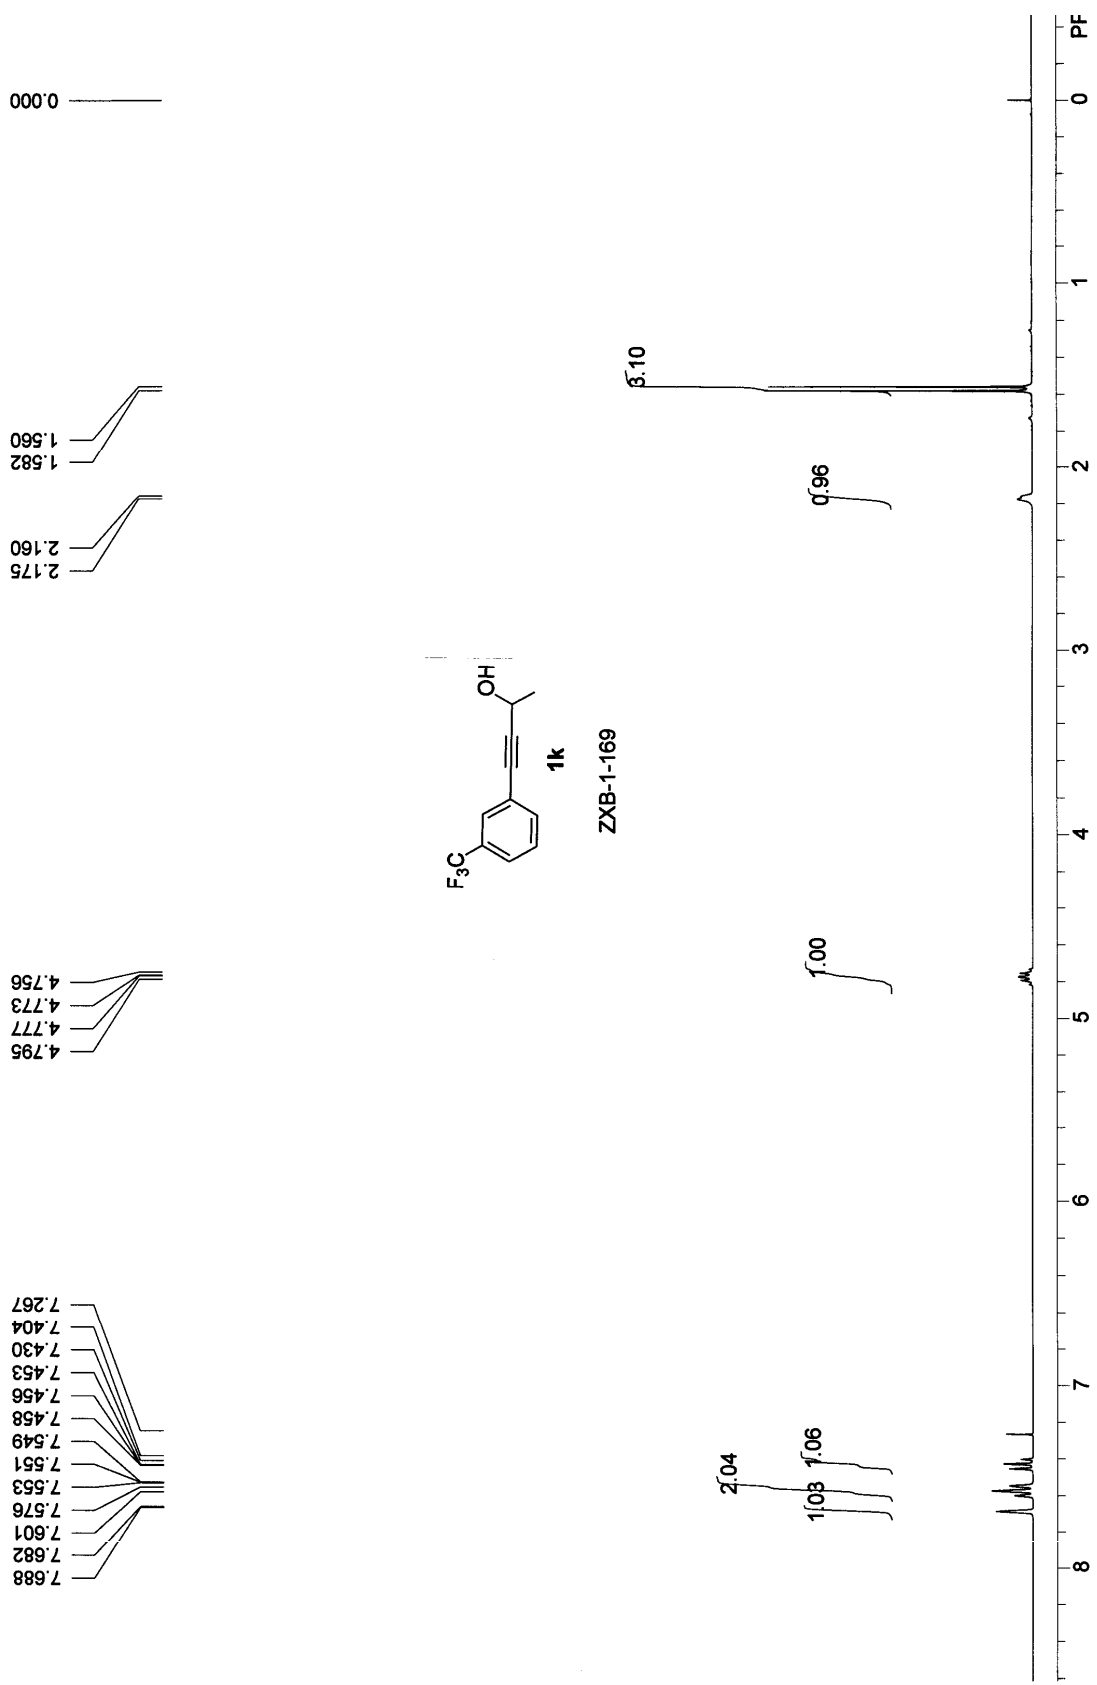

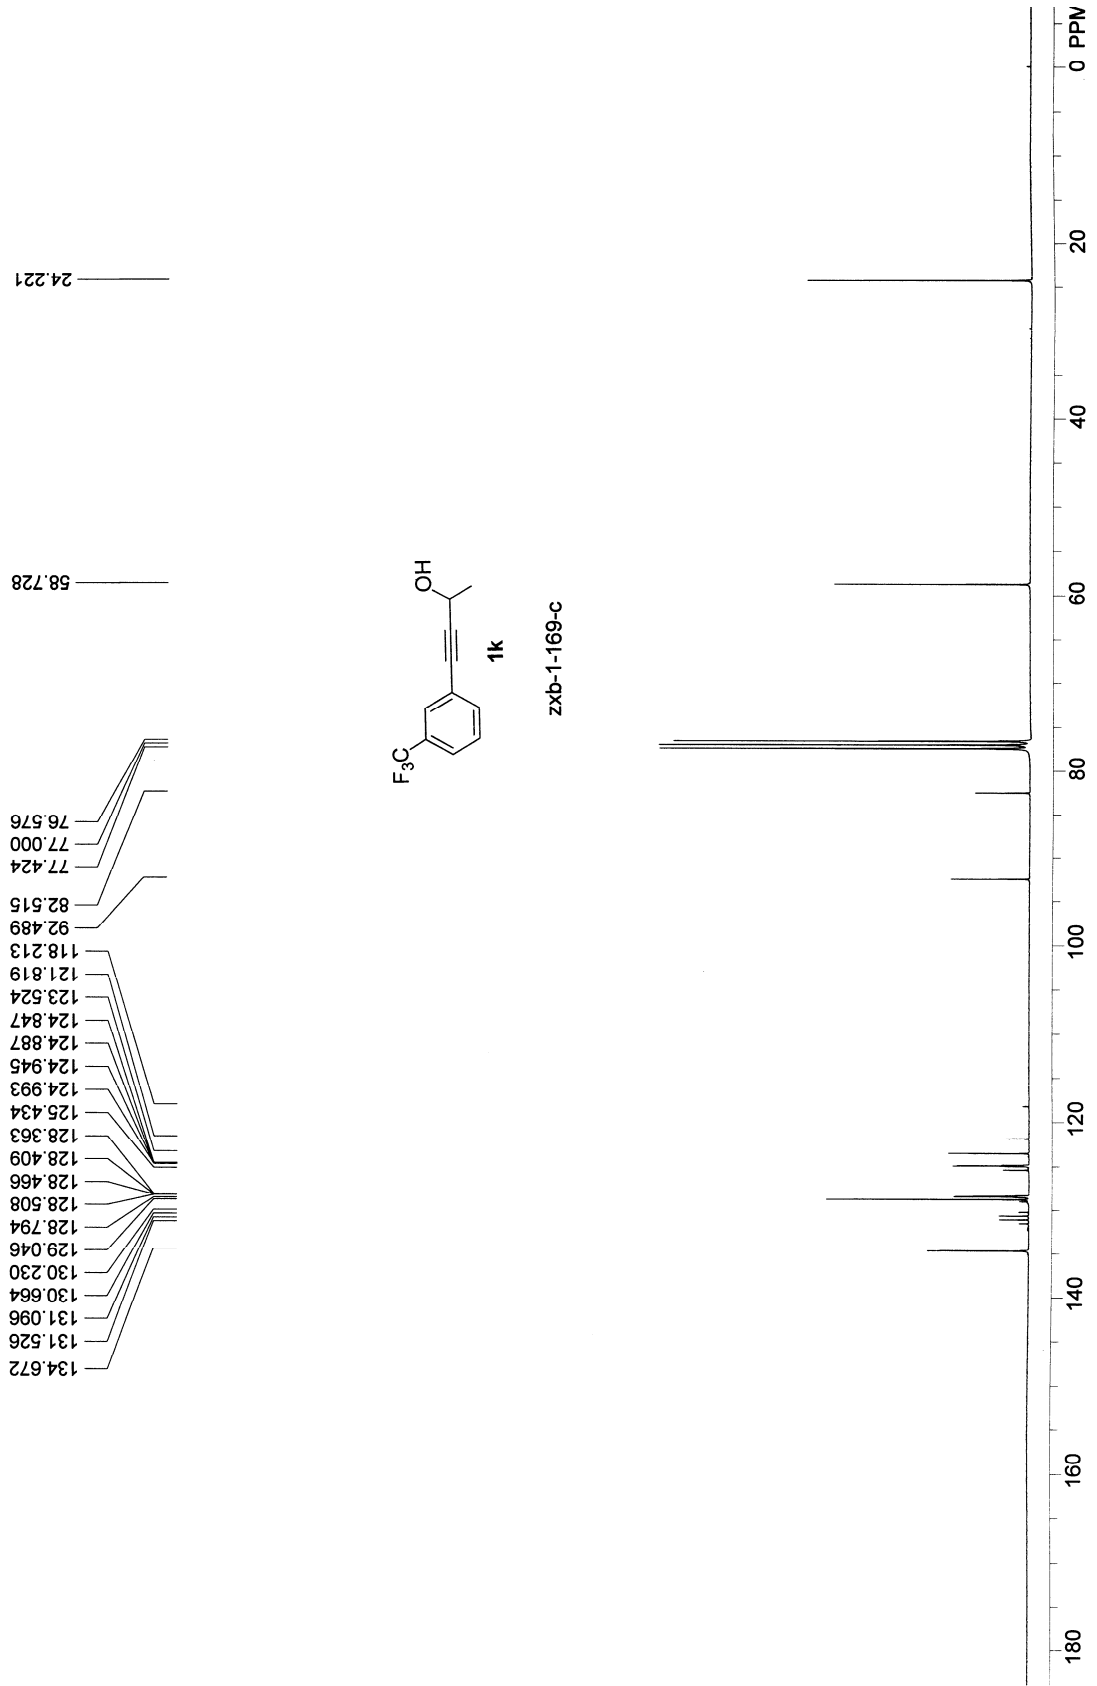

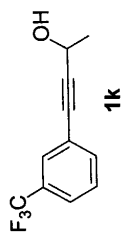

zxb-1-169-c

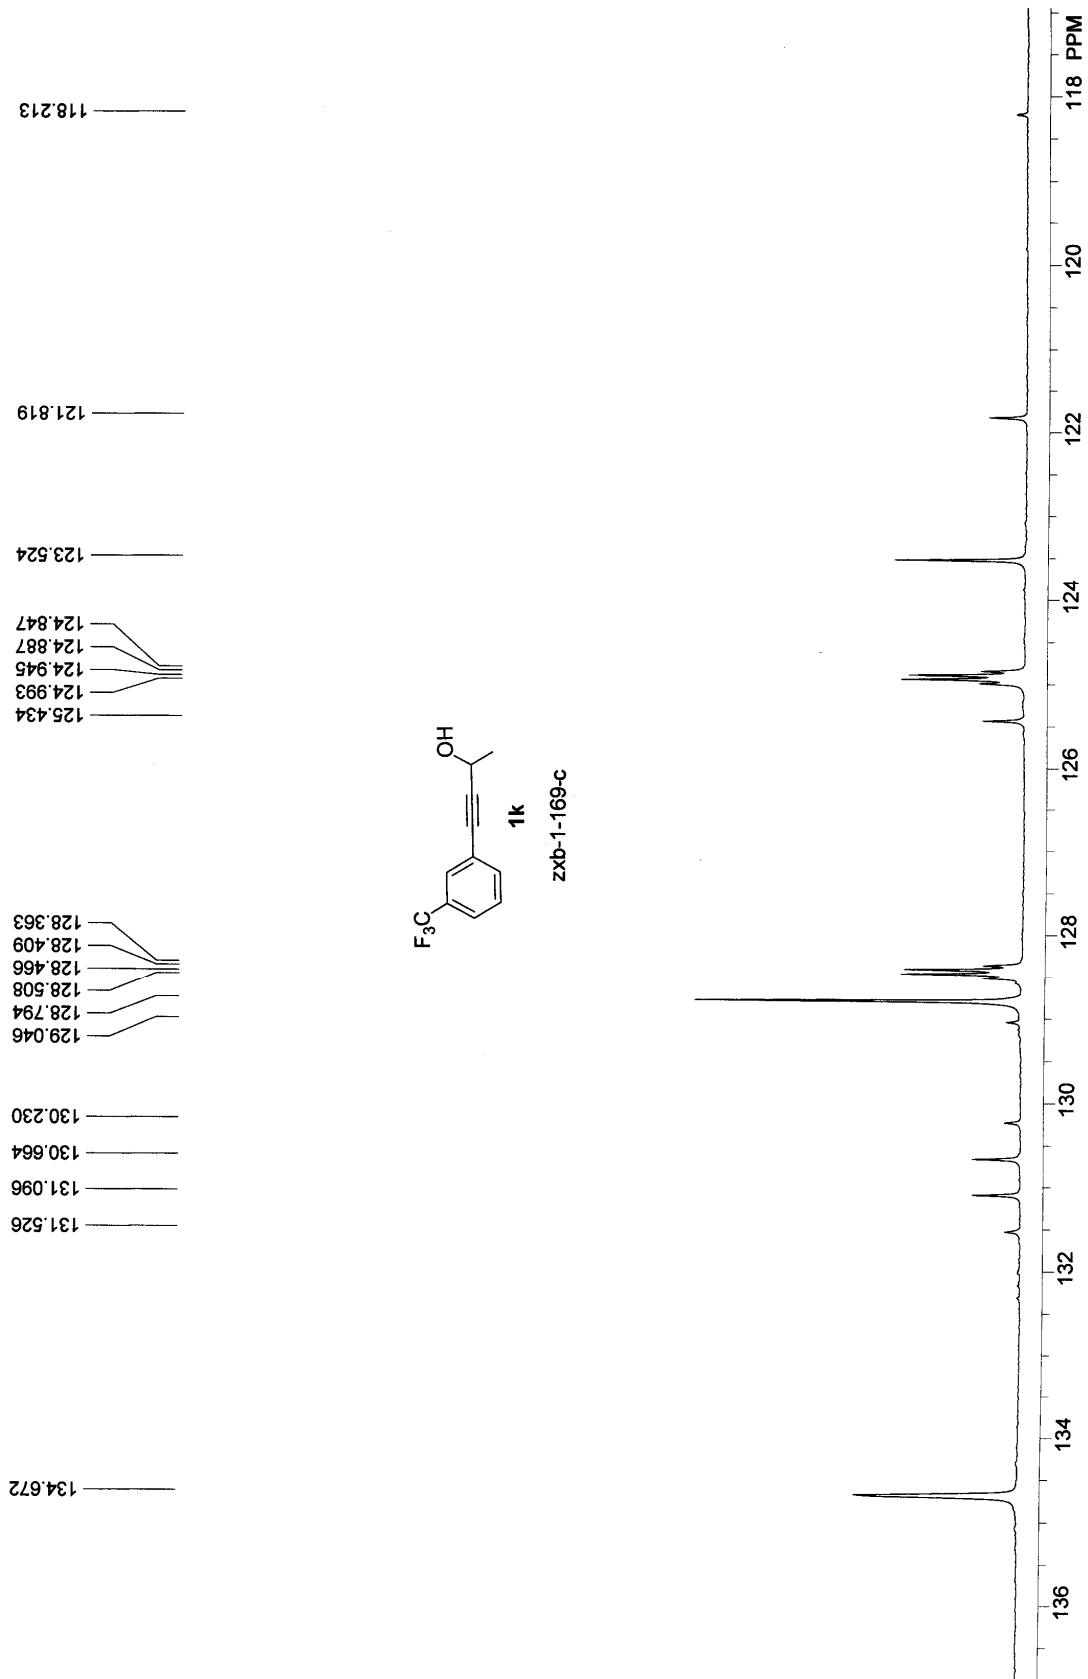



63.020

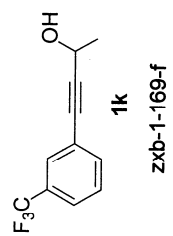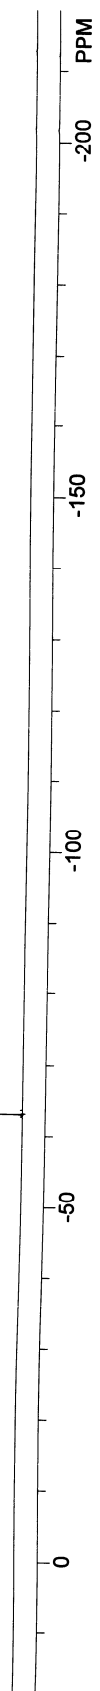

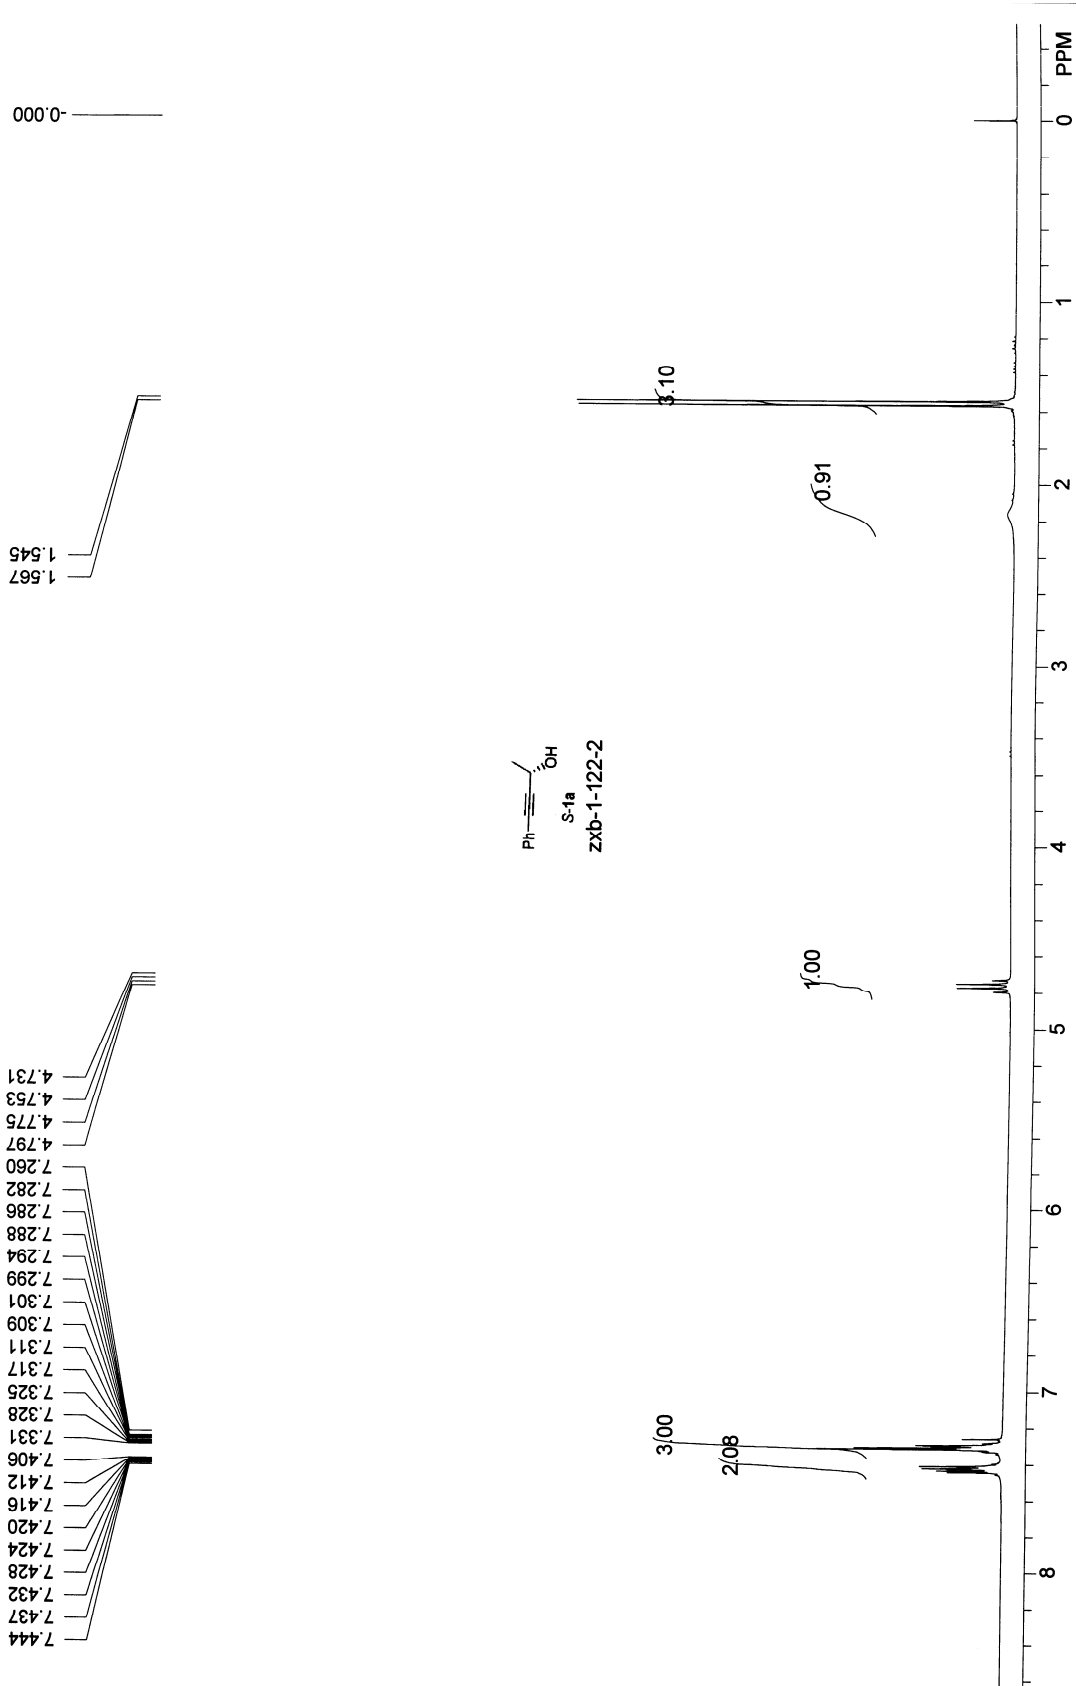

n-hexane/i-propanol=90/10; 230 nm; 1.0 ml/min; OJ-H

=====  
Injection Date : 4/10/2008 8:53:29 PM  
Sample Name : zxb-1-119-2  
Acq. Operator : zxb  
Method : D:\HPCHEM\1\METHODS\ERIC.M  
Last changed : 4/10/2008 8:40:09 PM by cb  
(modified after loading)

Location : -

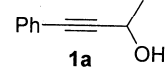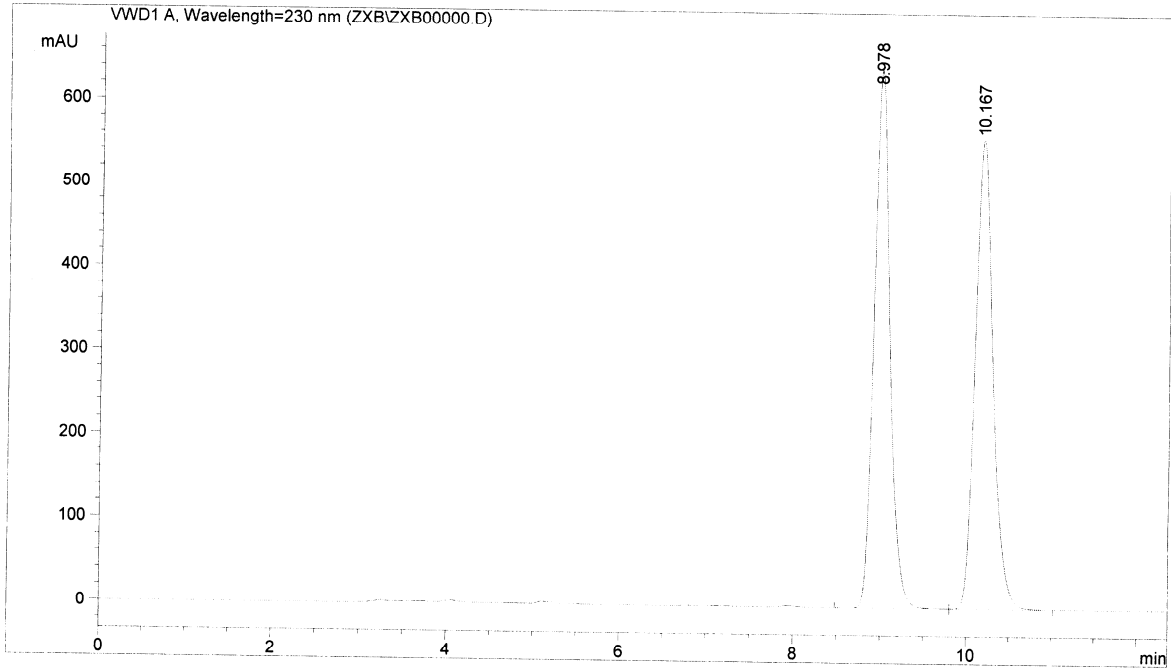

=====  
Area Percent Report  
=====

Sorted By : Signal  
Multiplier : 1.0000  
Dilution : 1.0000  
Use Multiplier & Dilution Factor with ISTDs

Signal 1: VWD1 A, Wavelength=230 nm

| Peak # | RetTime [min] | Type | Width [min] | Area mAU   | Area *s   | Height [mAU] | Area % |
|--------|---------------|------|-------------|------------|-----------|--------------|--------|
| 1      | 8.978         | BV   | 0.1916      | 8165.71045 | 643.88654 | 49.9350      |        |
| 2      | 10.167        | VB   | 0.2213      | 8186.96094 | 560.62018 | 50.0650      |        |

Totals : 1.63527e4 1204.50671

Results obtained with enhanced integrator!

=====  
\*\*\* End of Report \*\*\*

n-hexane/i-propanol=90/10; 230 nm; 1.0 ml/min; OJ-H

```
=====  
Injection Date : 4/10/2008 9:08:34 PM  
Sample Name    : zxb-1-122-2  
Acq. Operator  : zxb  
Method         : D:\HPCHEM\1\METHODS\ERIC.M  
Last changed   : 4/10/2008 8:40:09 PM by cb  
                (modified after loading)
```

Location : -

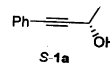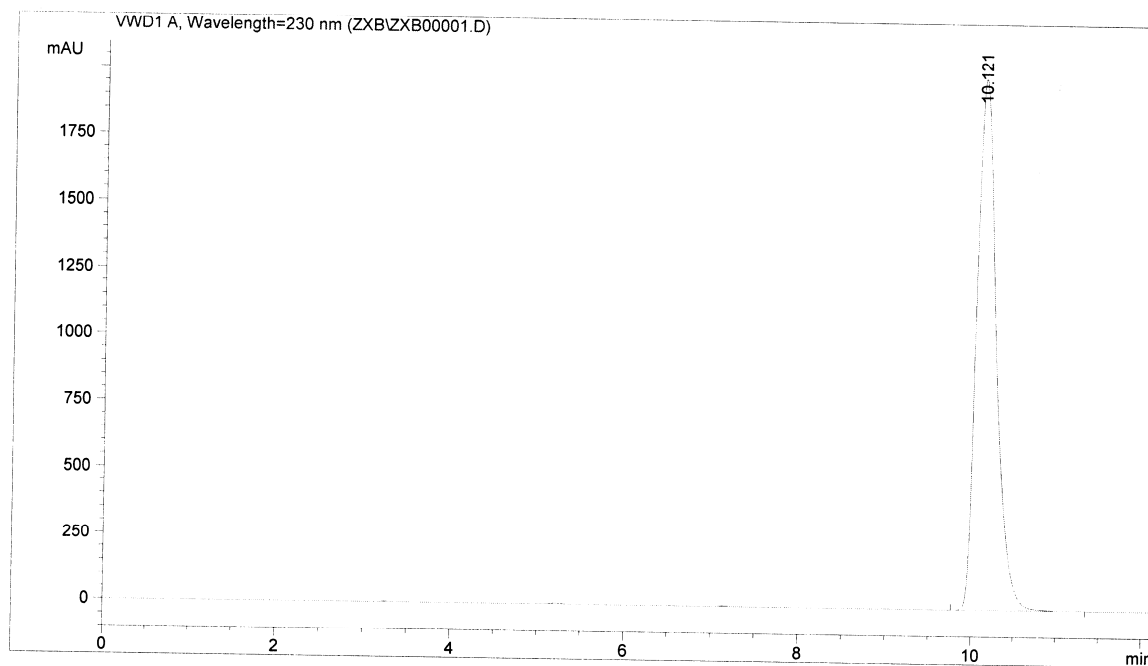

```
=====  
Area Percent Report  
=====
```

```
Sorted By      : Signal  
Multiplier     : 1.0000  
Dilution       : 1.0000  
Use Multiplier & Dilution Factor with ISTDs
```

Signal 1: VWD1 A, Wavelength=230 nm

| Peak # | RetTime [min] | Type | Width [min] | Area mAU  | Area *s | Height [mAU] | Area %   |
|--------|---------------|------|-------------|-----------|---------|--------------|----------|
| 1      | 10.121        | BB   | 0.2467      | 3.20112e4 |         | 1997.00330   | 100.0000 |

```
Totals :                3.20112e4  1997.00330
```

Results obtained with enhanced integrator!

```
=====  
*** End of Report ***
```

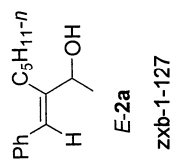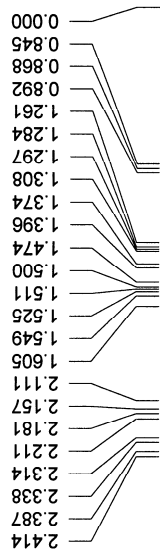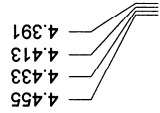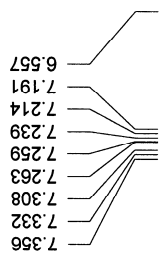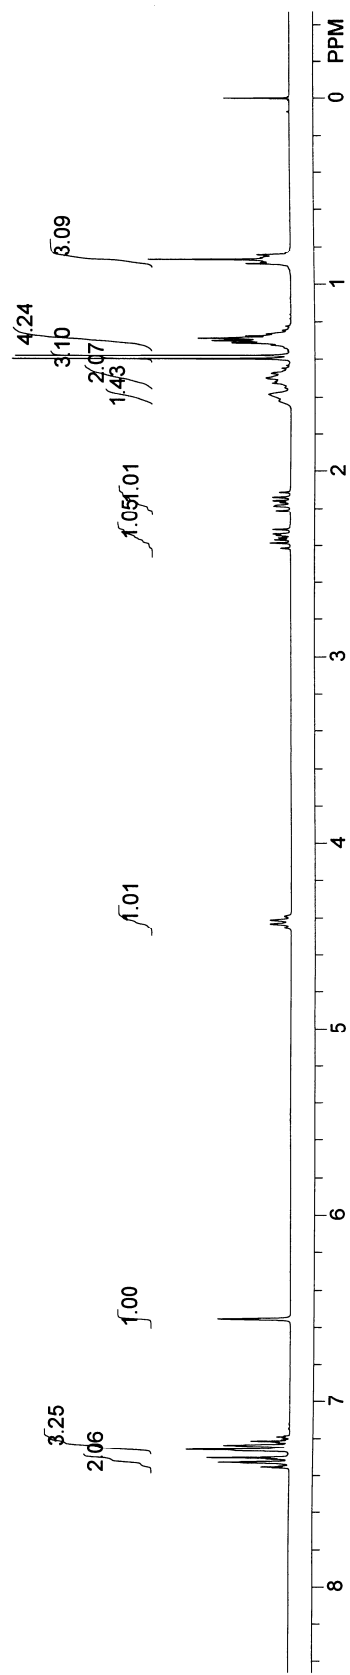

Zxb-1-127

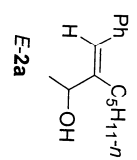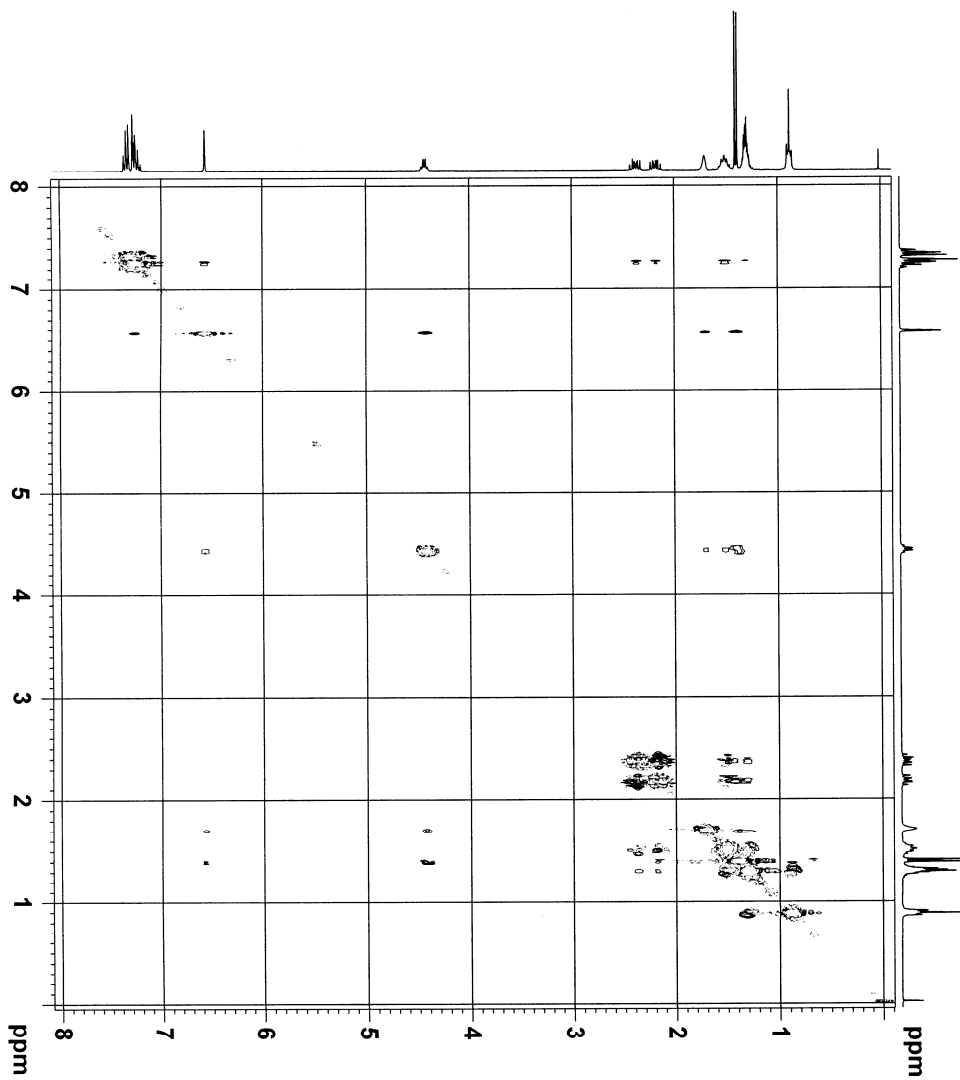

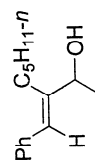

*E*-2a

ZXB-1-127-C

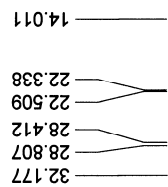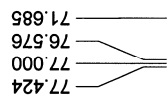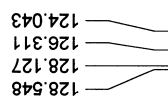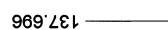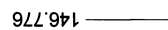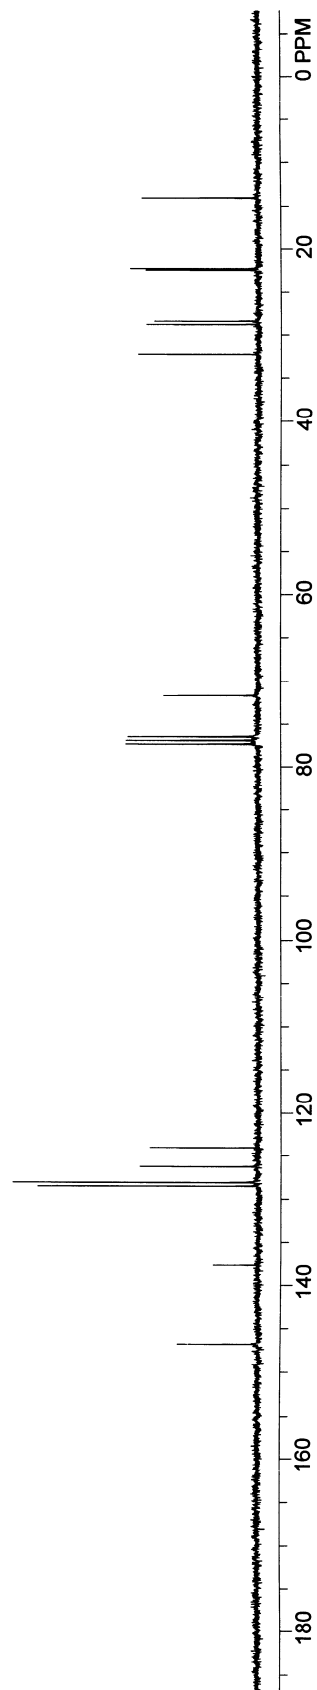

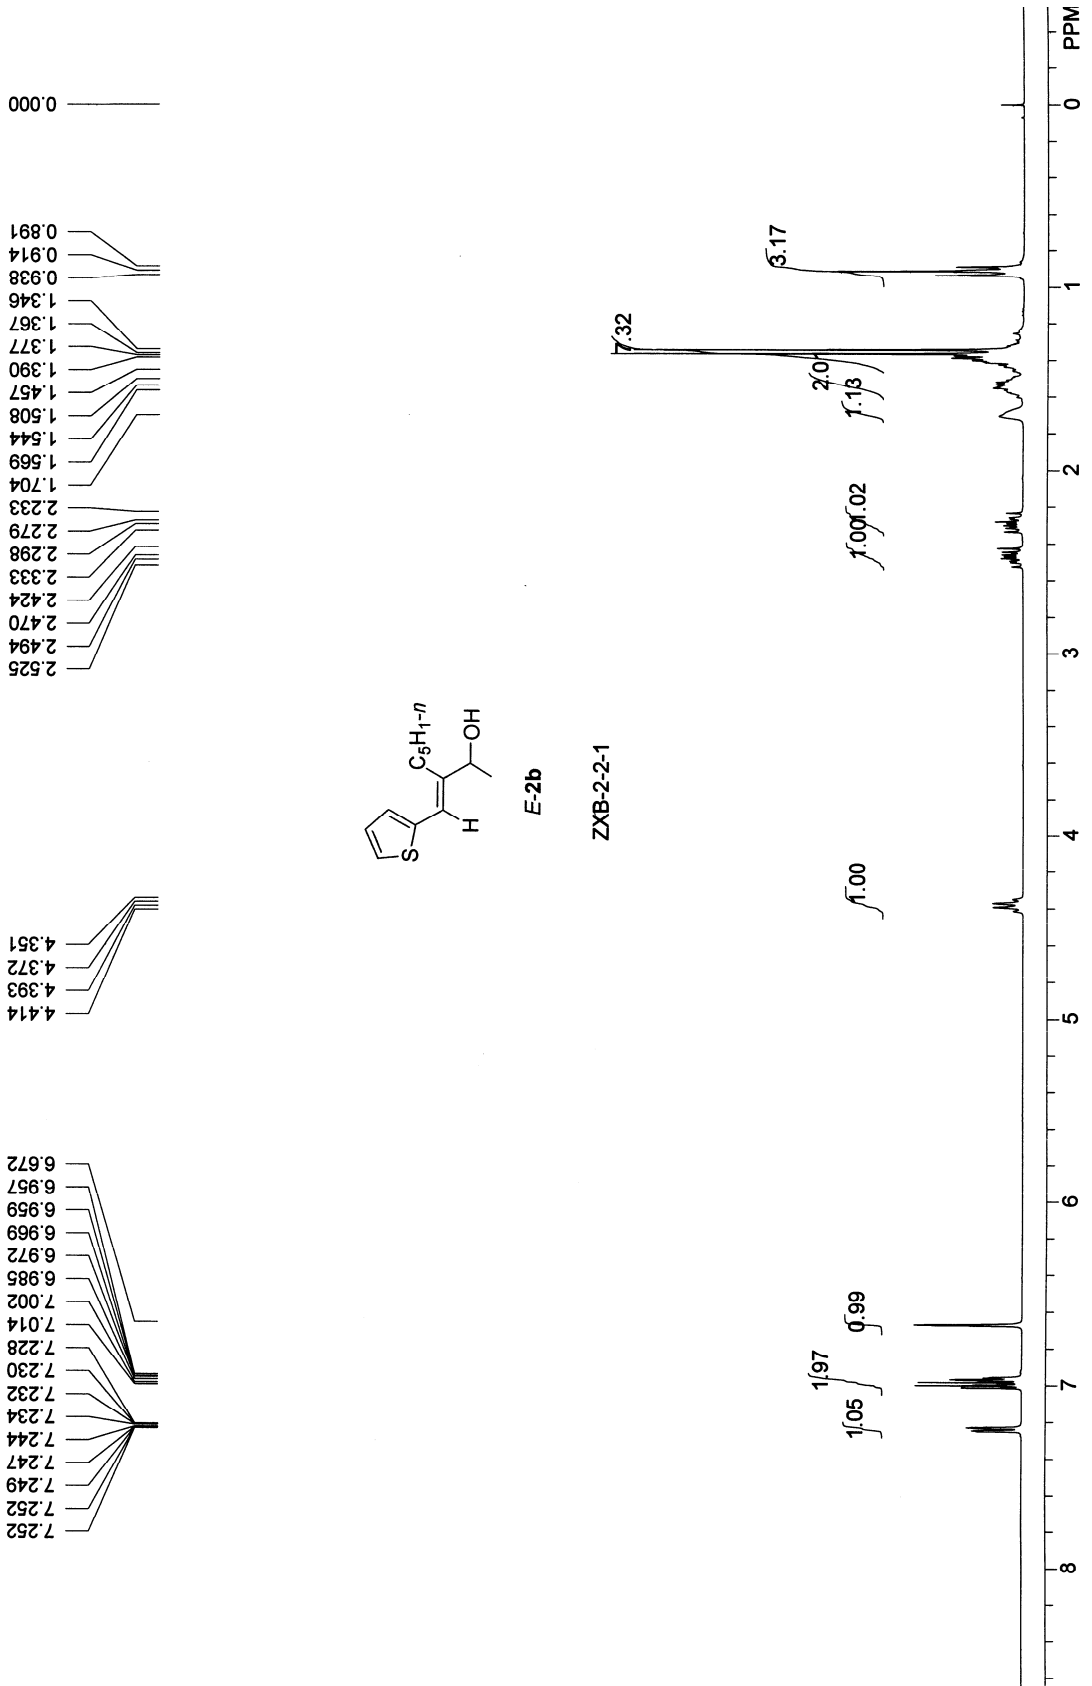



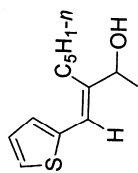

*E*-2b

ZXB-2-2-1-C

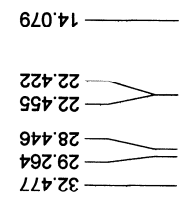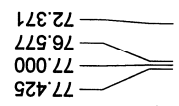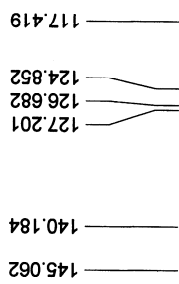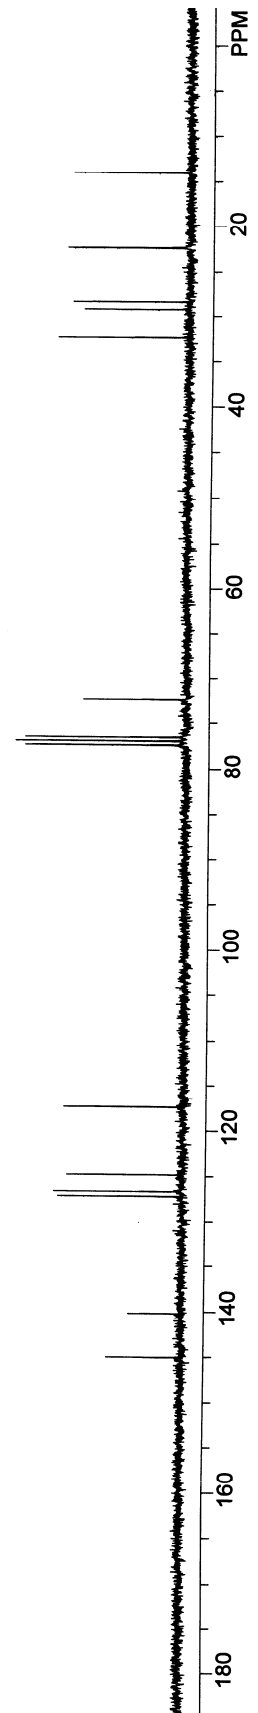

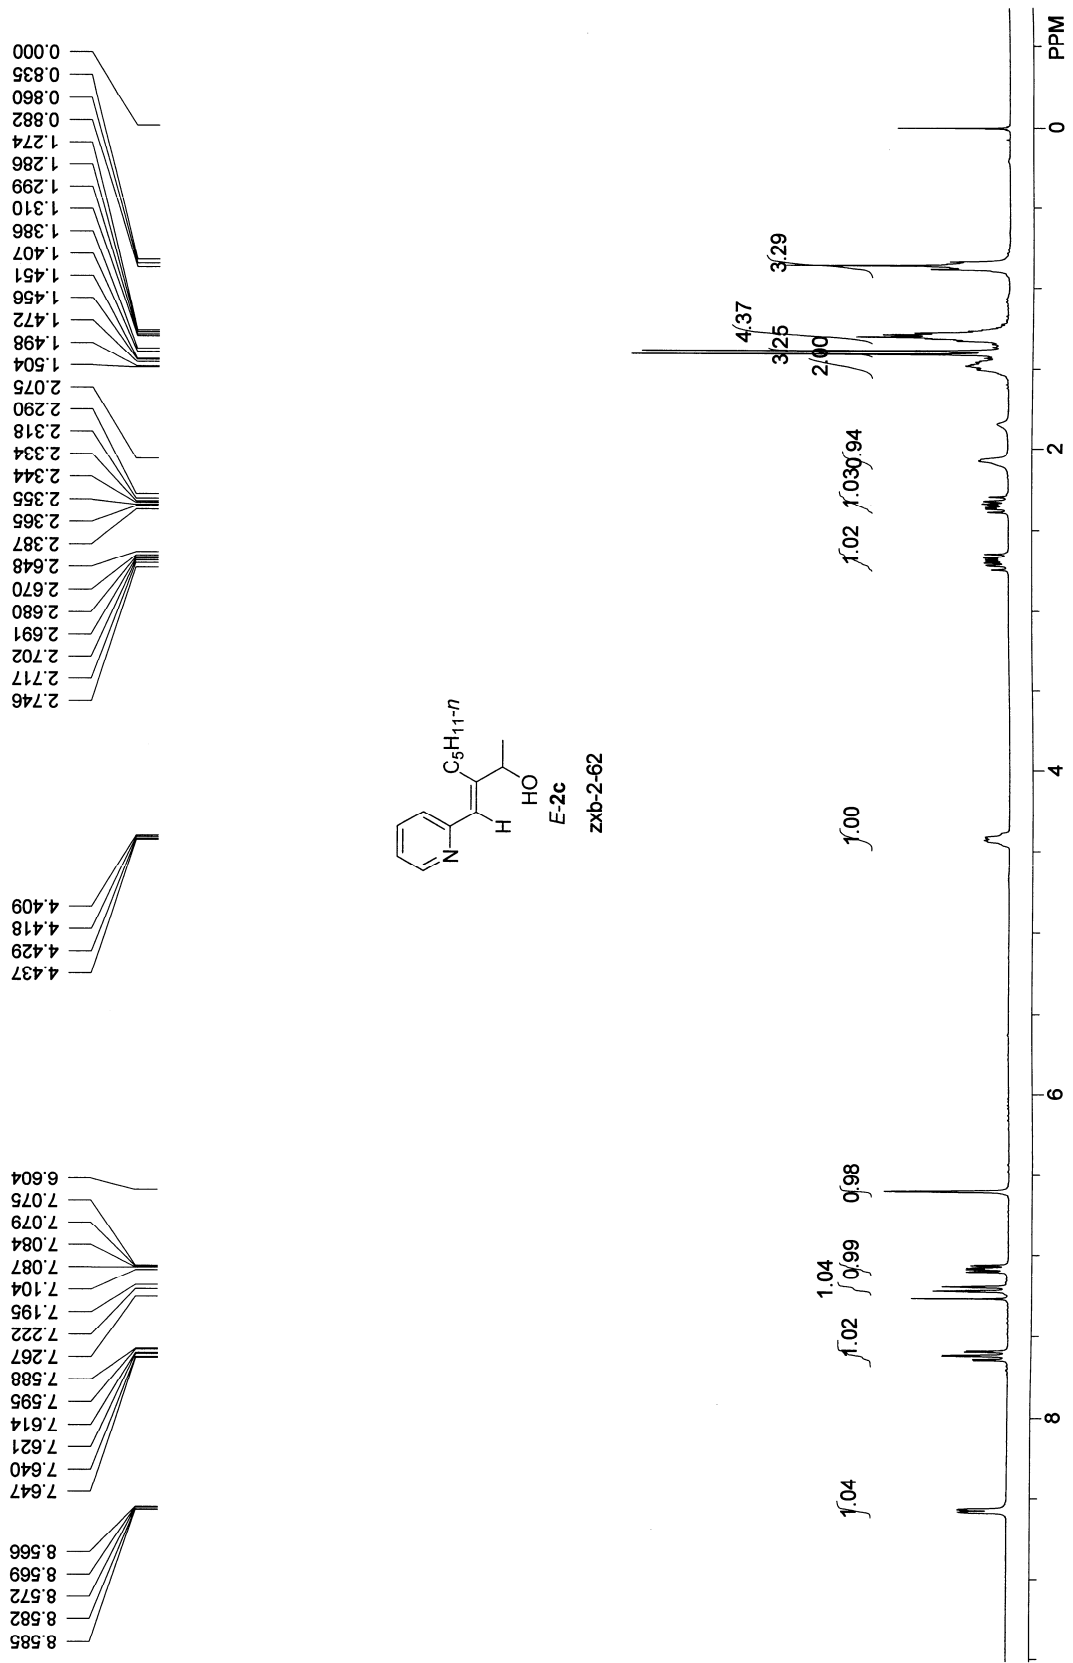

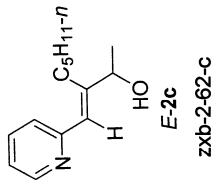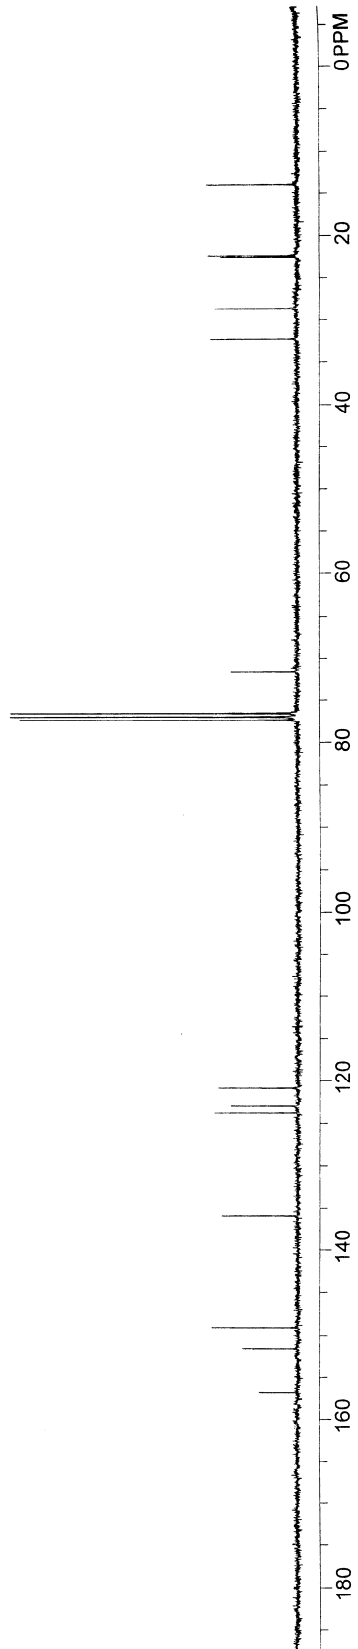

13.990  
 22.300  
 22.460  
 28.634  
 28.728  
 32.222

71.709  
 76.578  
 77.000  
 77.422

120.898  
 122.977  
 123.783

135.922

149.104  
 151.661  
 156.898

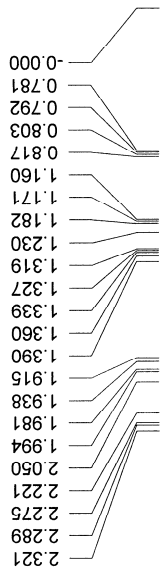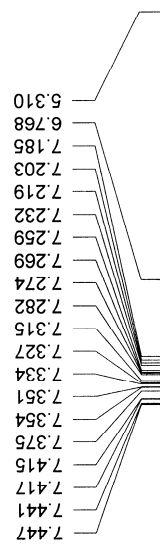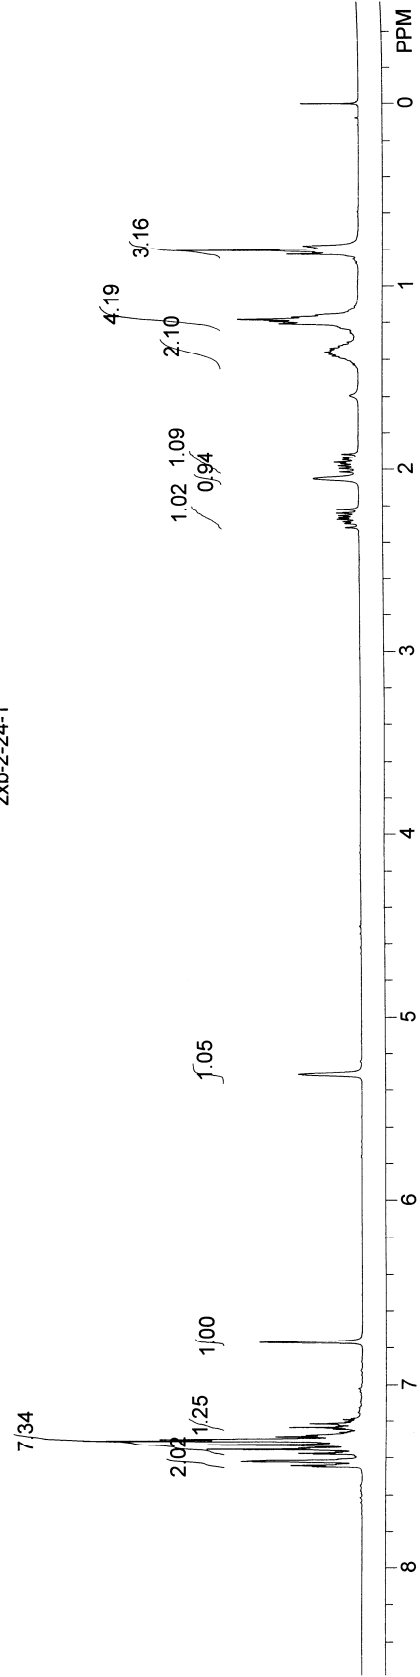

32.023  
28.592  
28.460  
22.215  
13.924

77.807  
77.421  
77.000  
76.578

144.348  
142.312  
137.606  
128.662  
128.398  
128.163  
127.716  
126.844  
126.456  
125.611

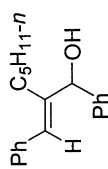

*E-2d*

zxb-2-24-c

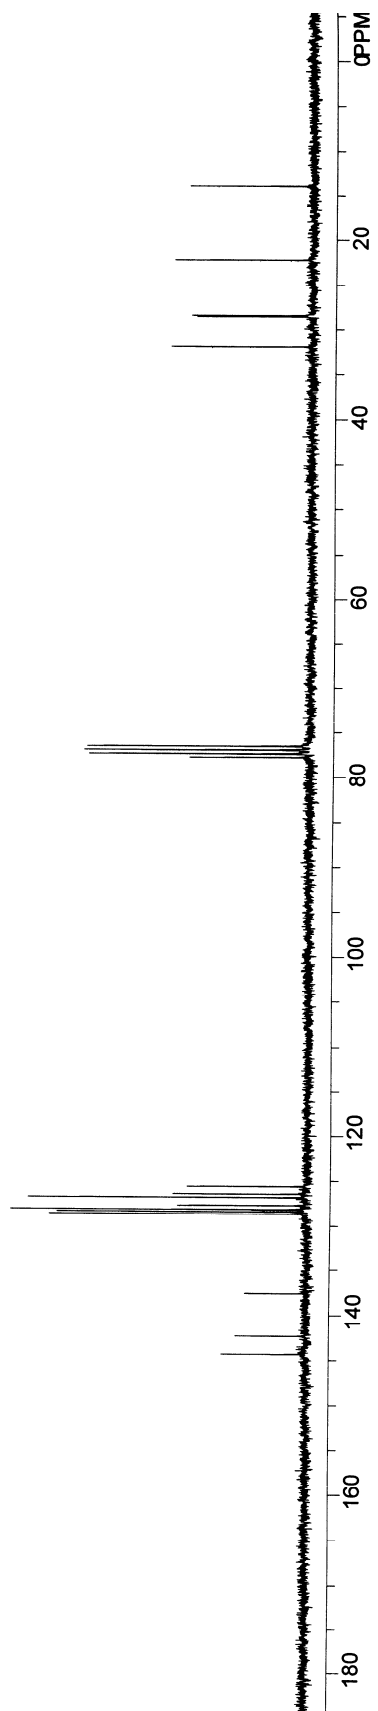

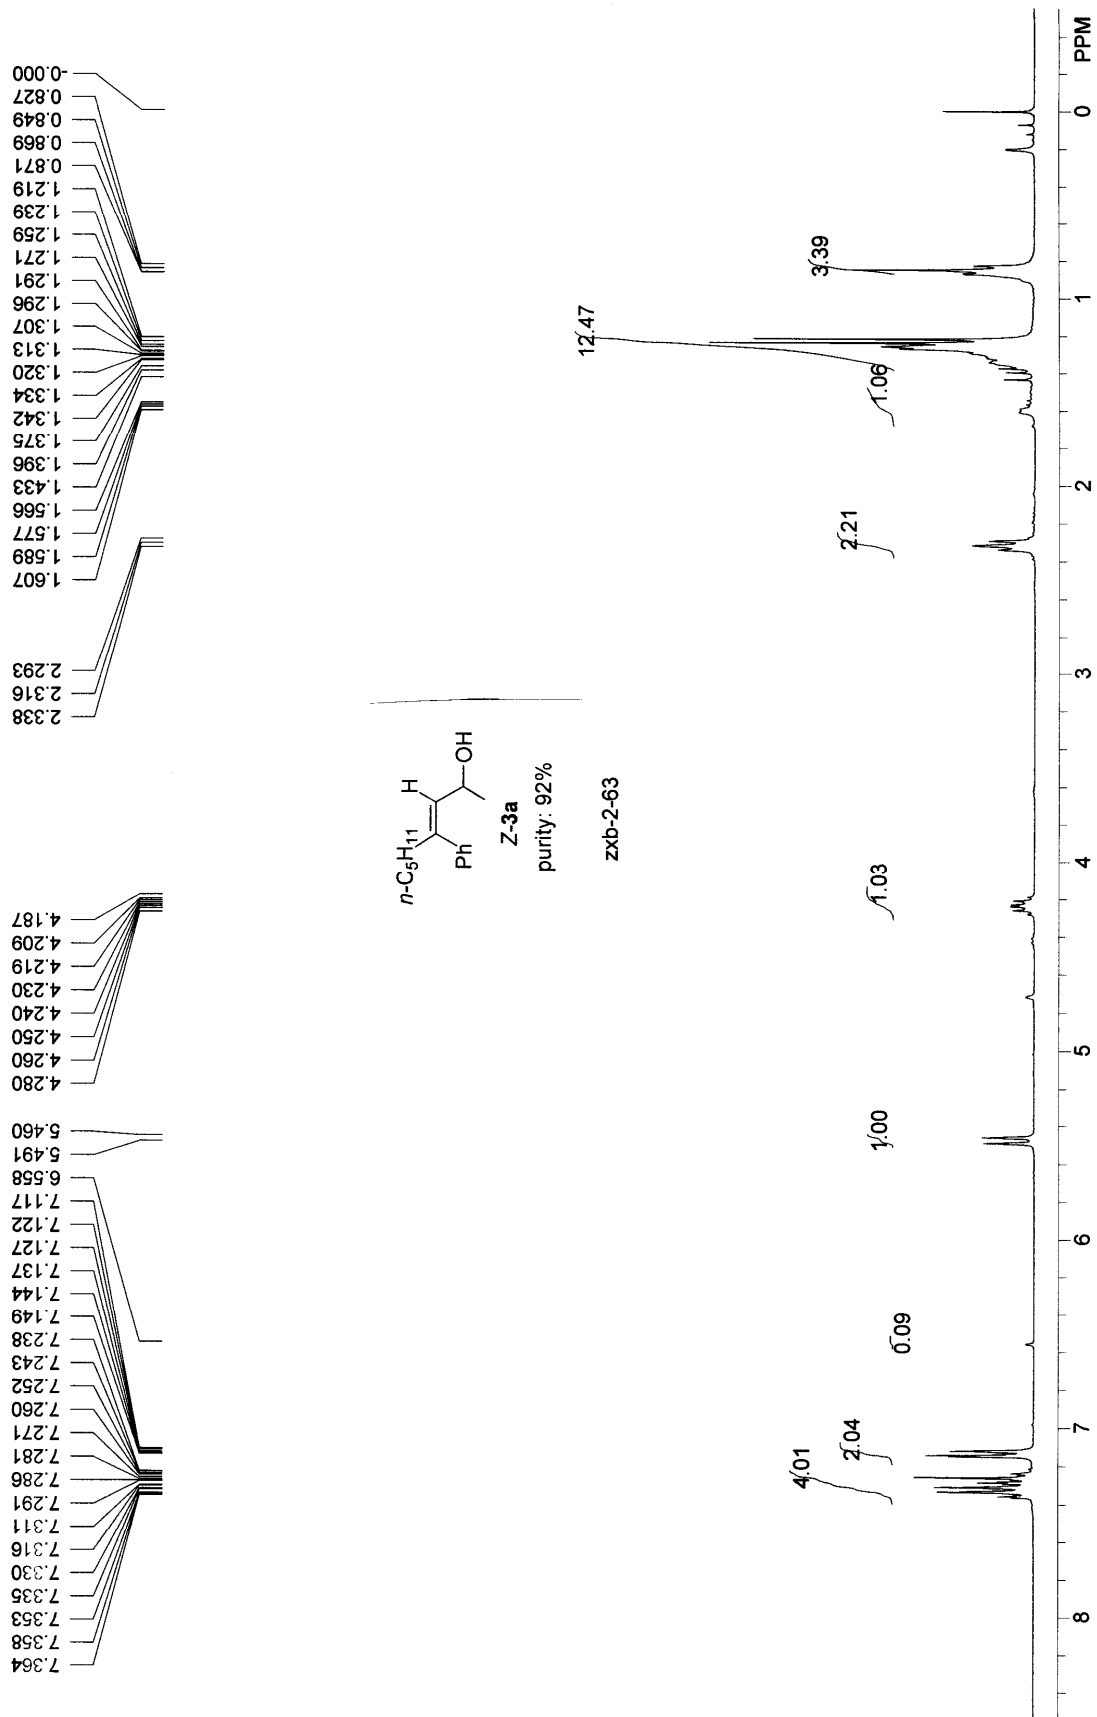

zxb-2-63-noe

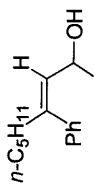

Z-3a

purity: 92%

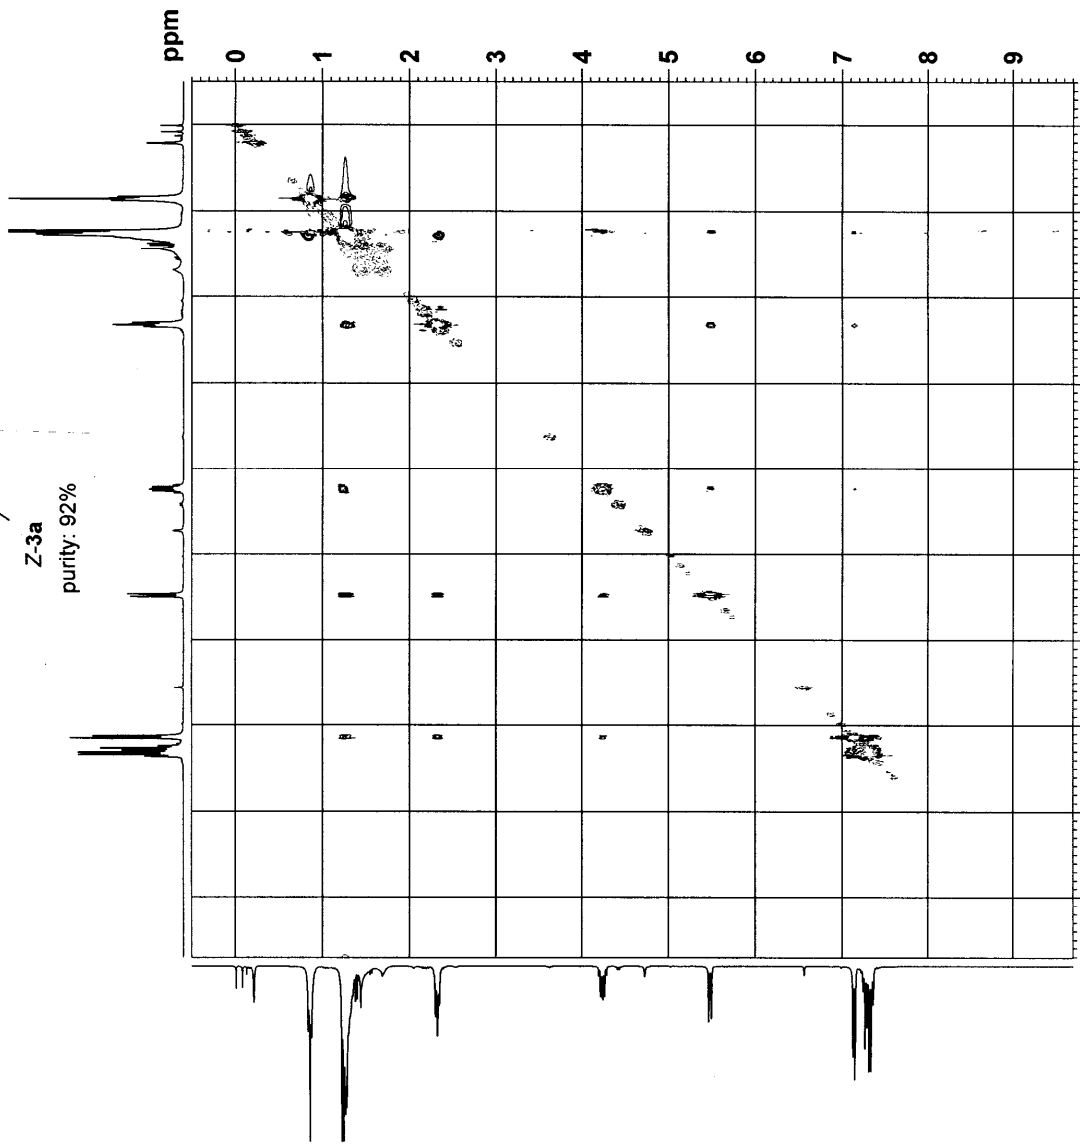

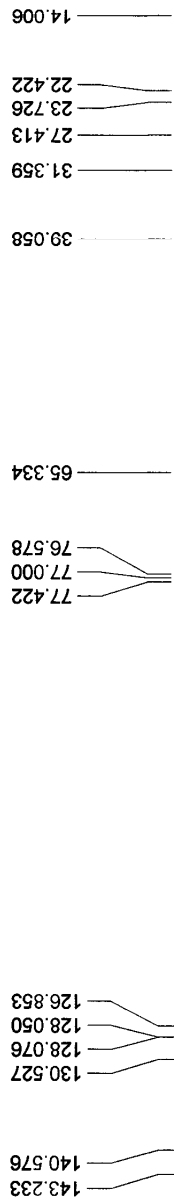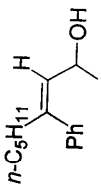

Z-3a

purity: 92%

zxb-2-63-c

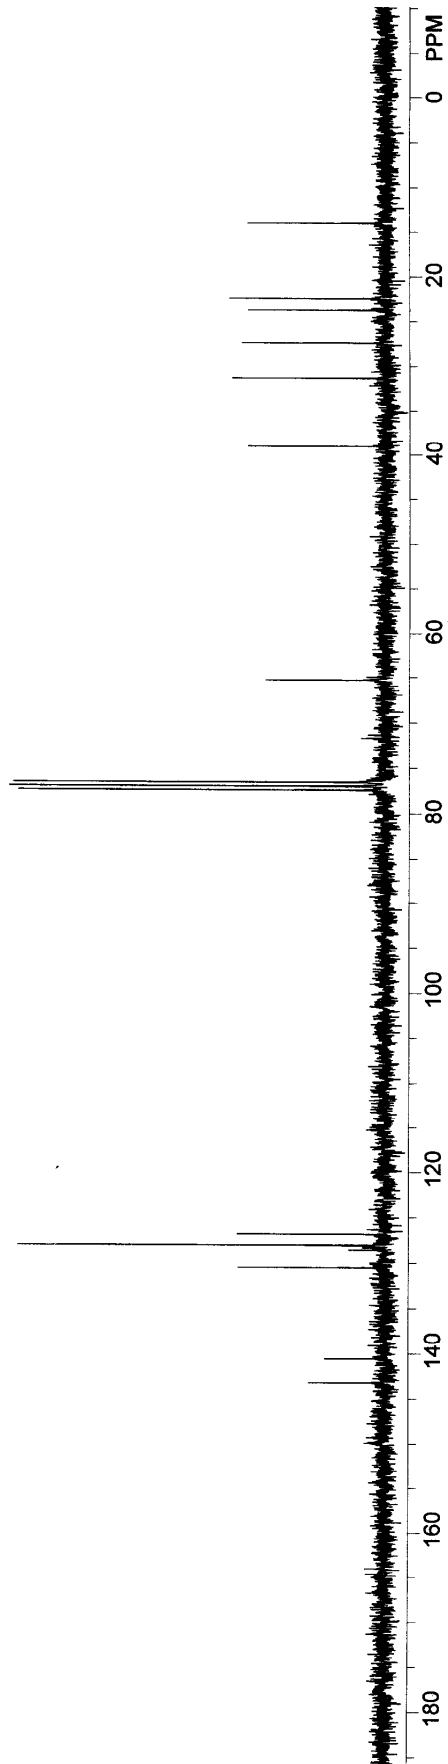



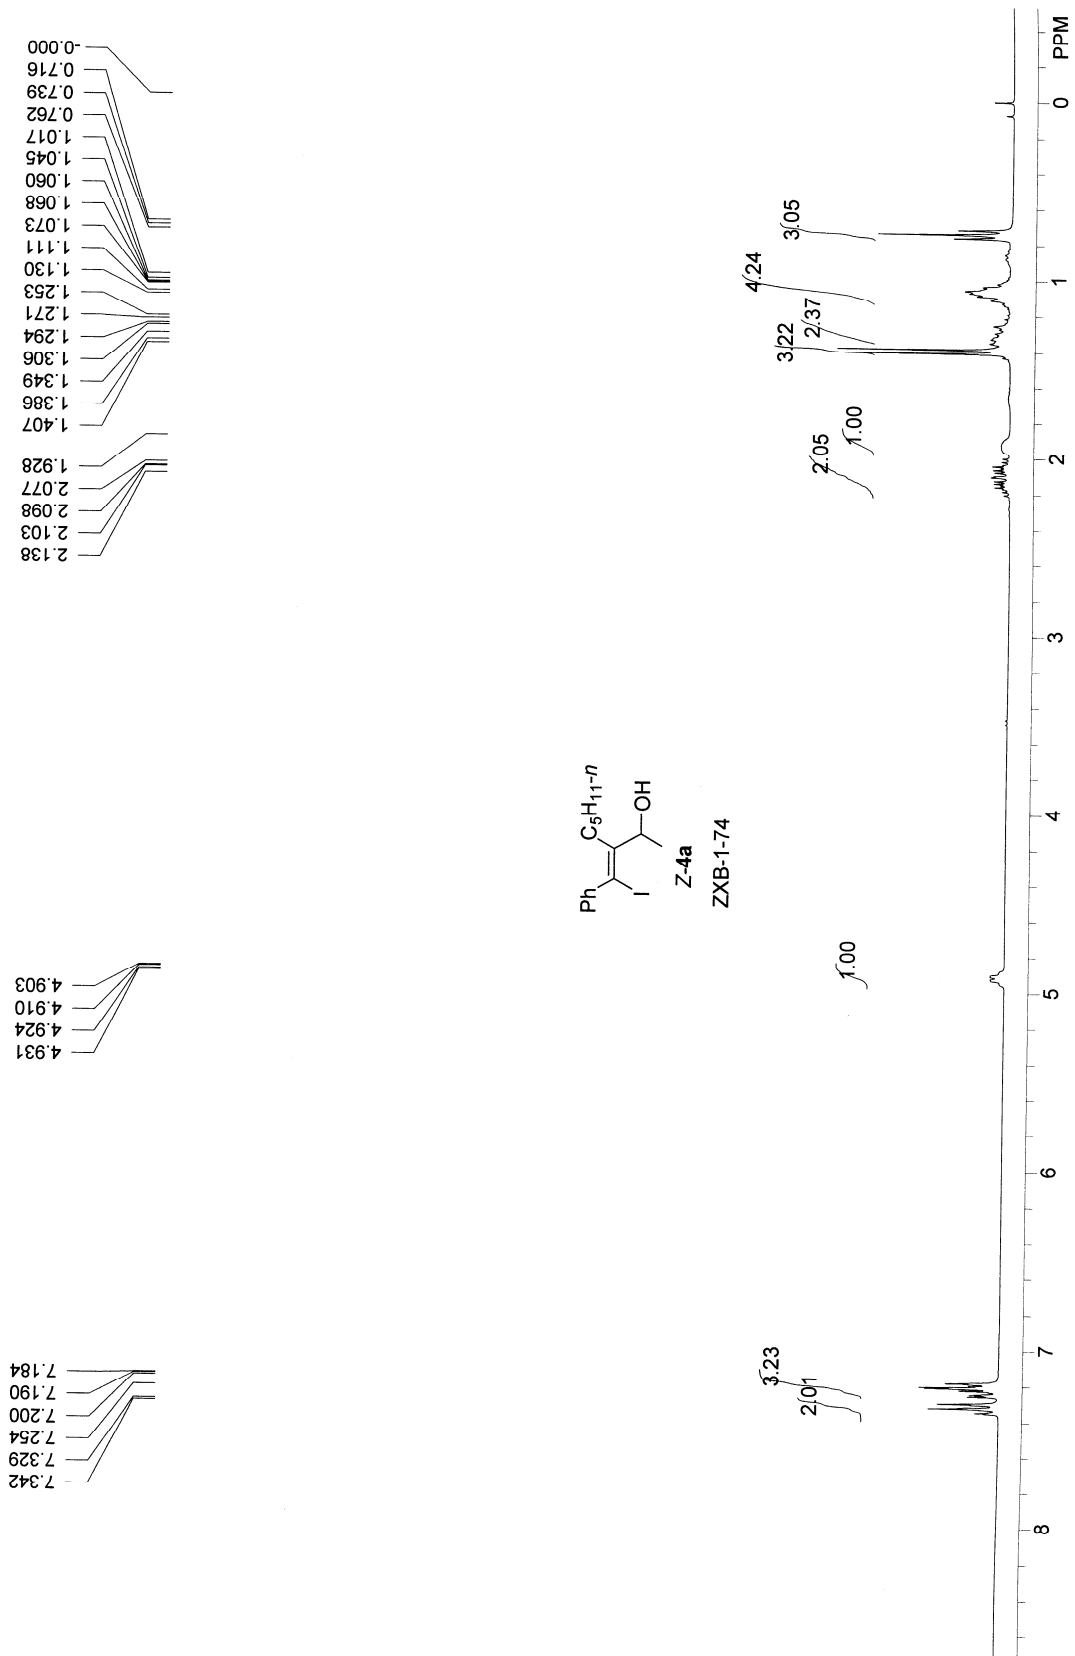

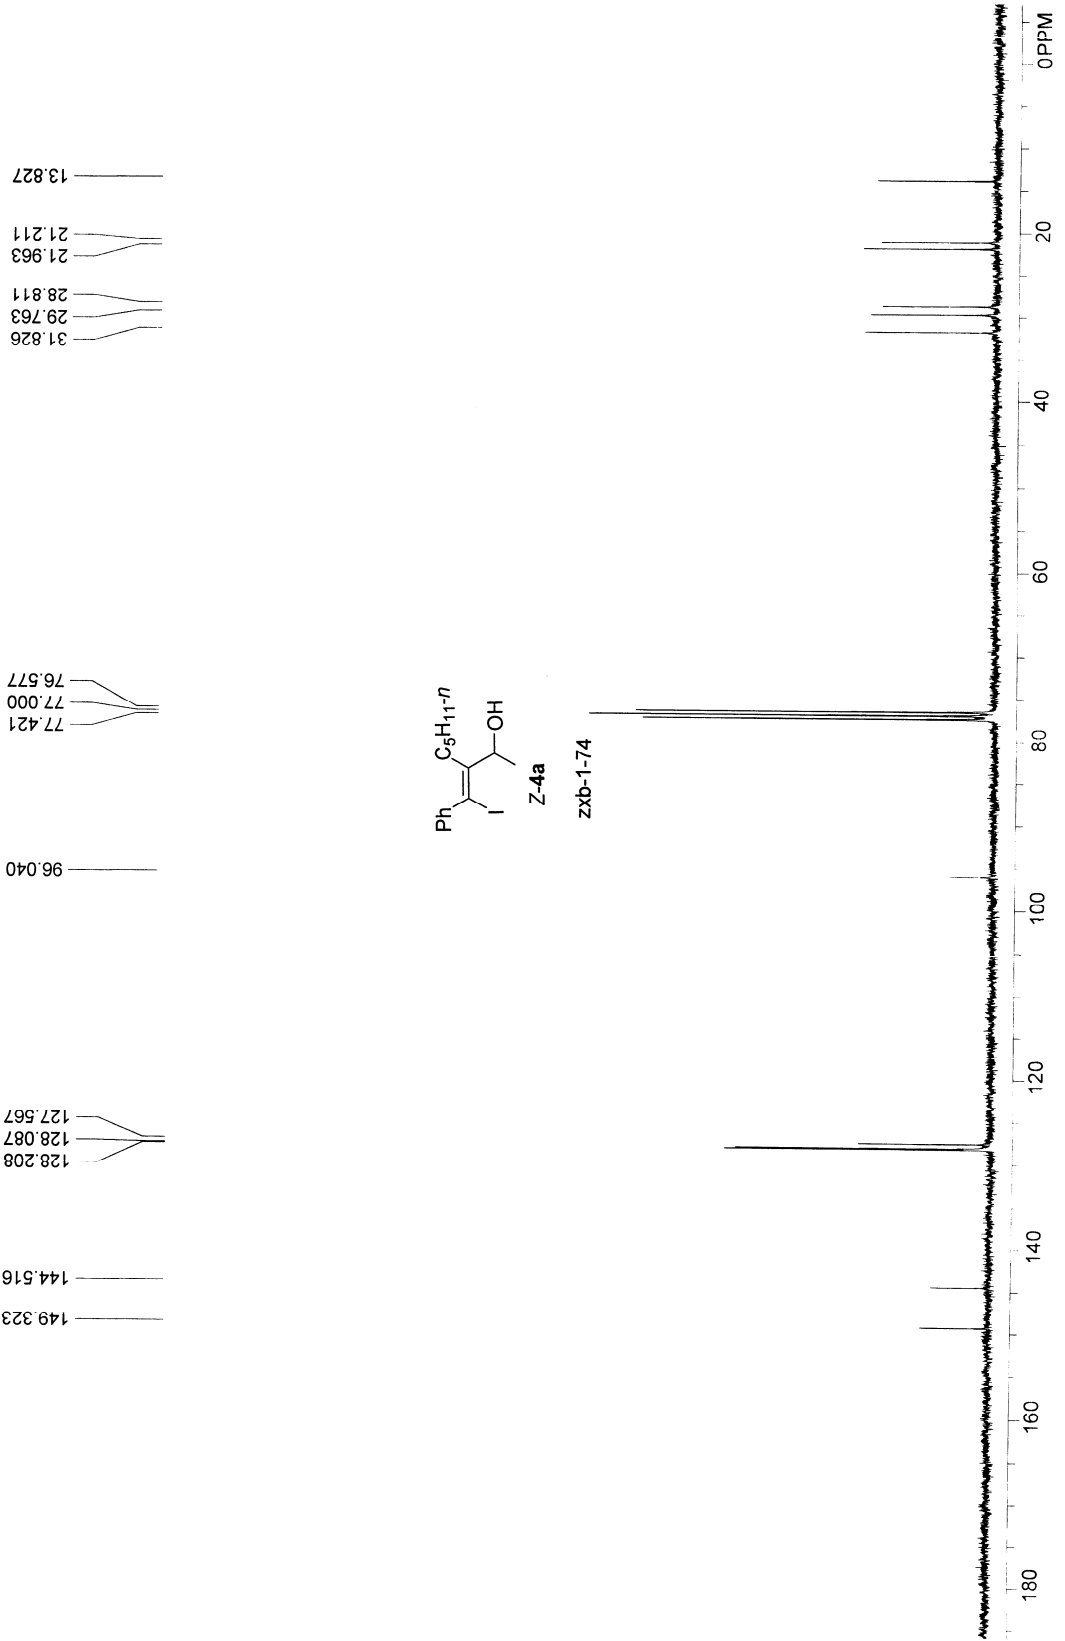

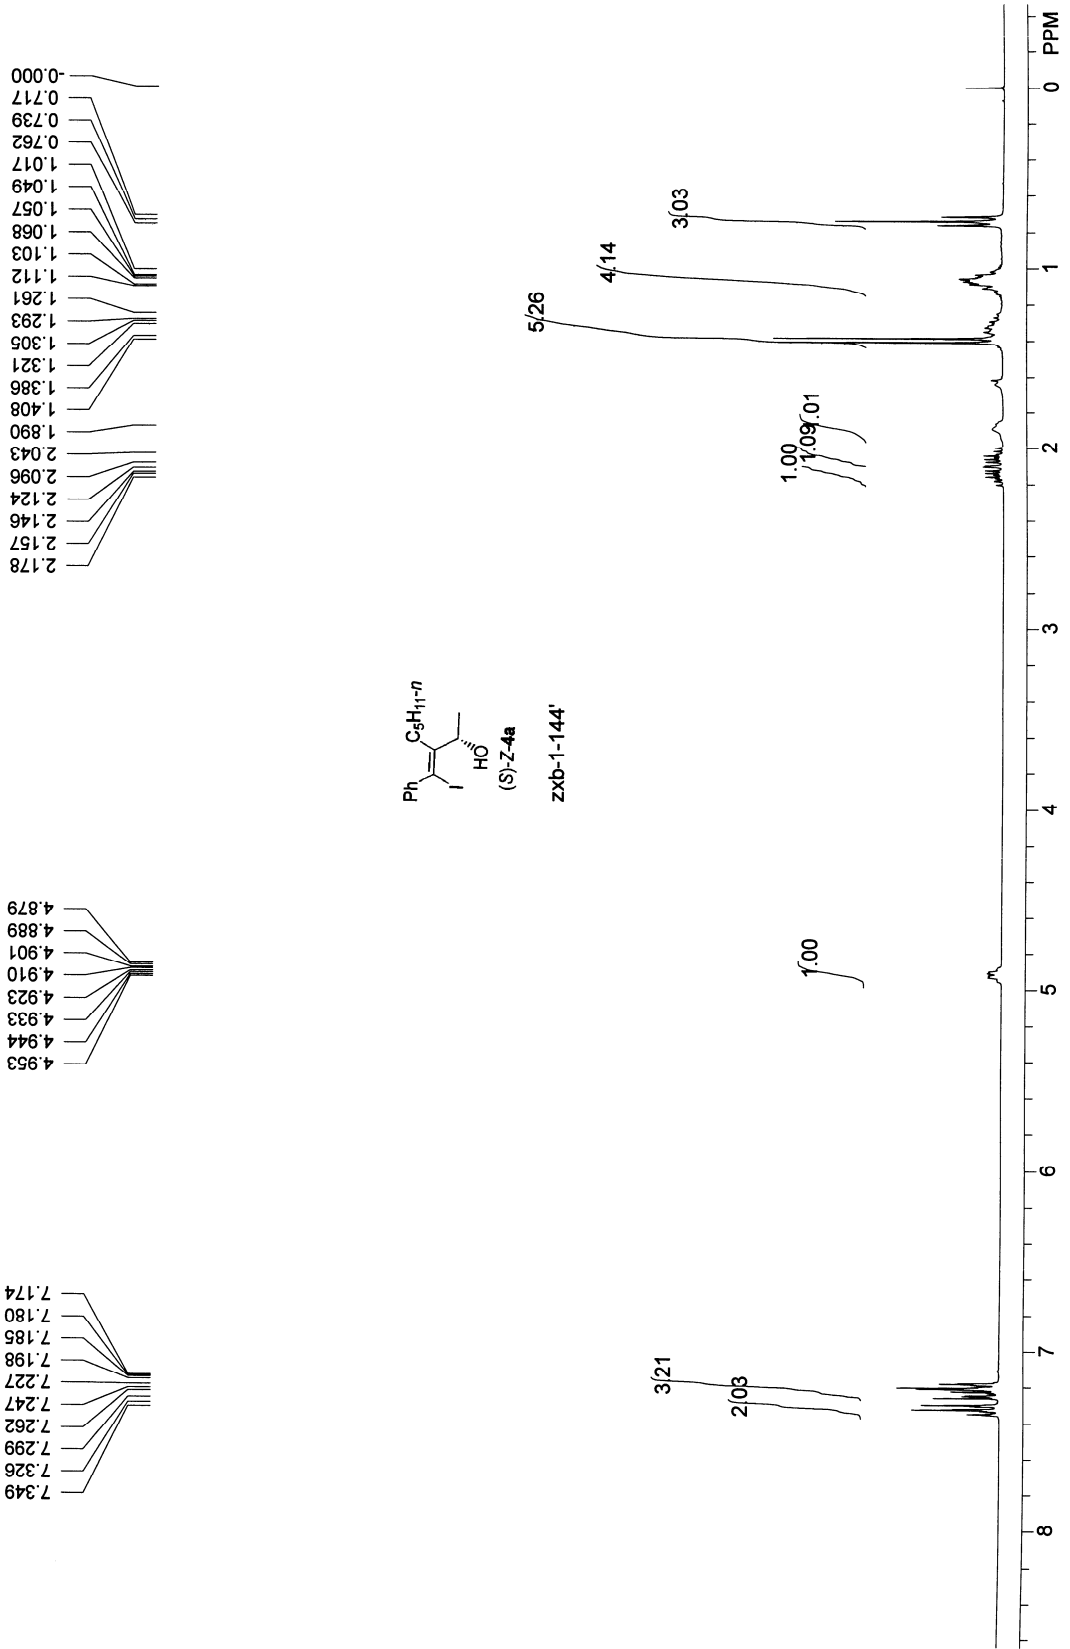

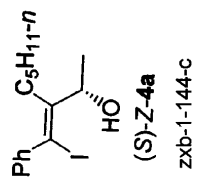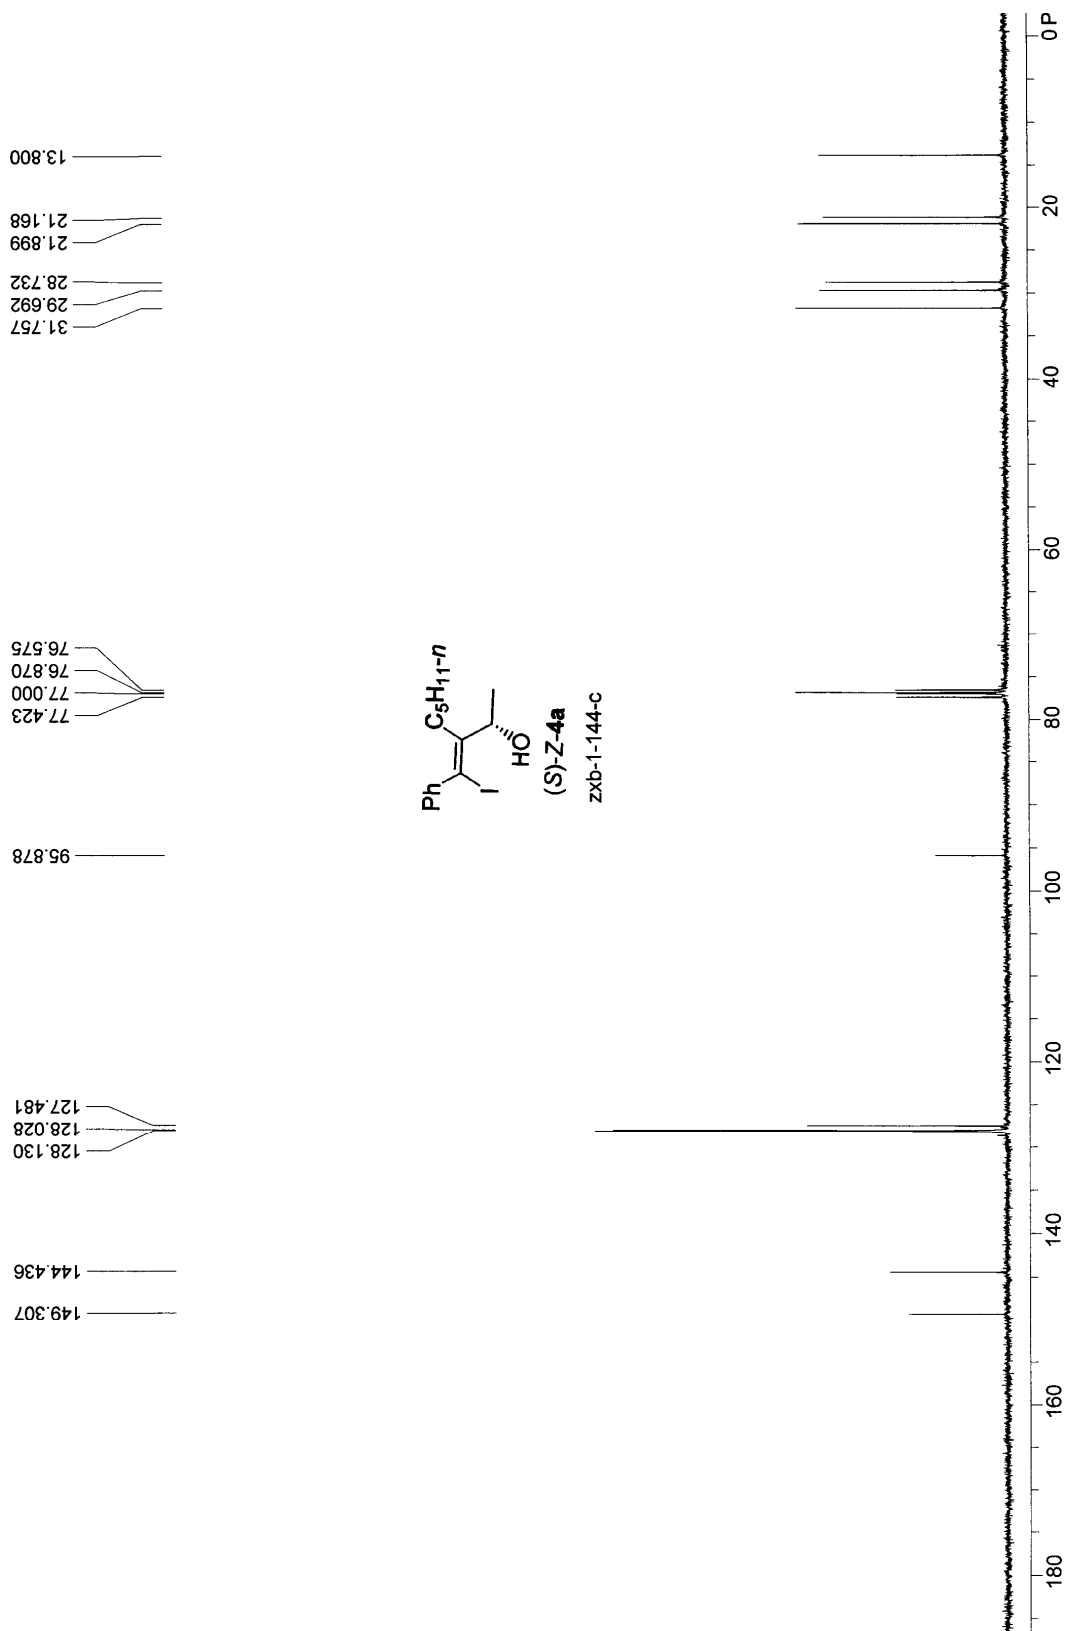

Me/i-propanol=95/5; 230nm; 0.5 ml/min; AS-H

44

=====  
Injection Date : 4/24/2008 7:55:08 PM  
Sample Name : zxb-1-144 90 Location  
Operator : zxb  
Method : D:\HPCHEM\1\METHODS\ERIC.M  
Last changed : 4/24/2008 7:53:31 PM by zxb  
(modified after loading)  
Analysis Method : D:\HPCHEM\1\METHODS\ERIC.M  
Last changed : 4/24/2008 8:44:47 PM by mao  
(modified after loading)  
=====

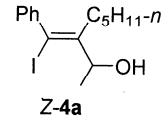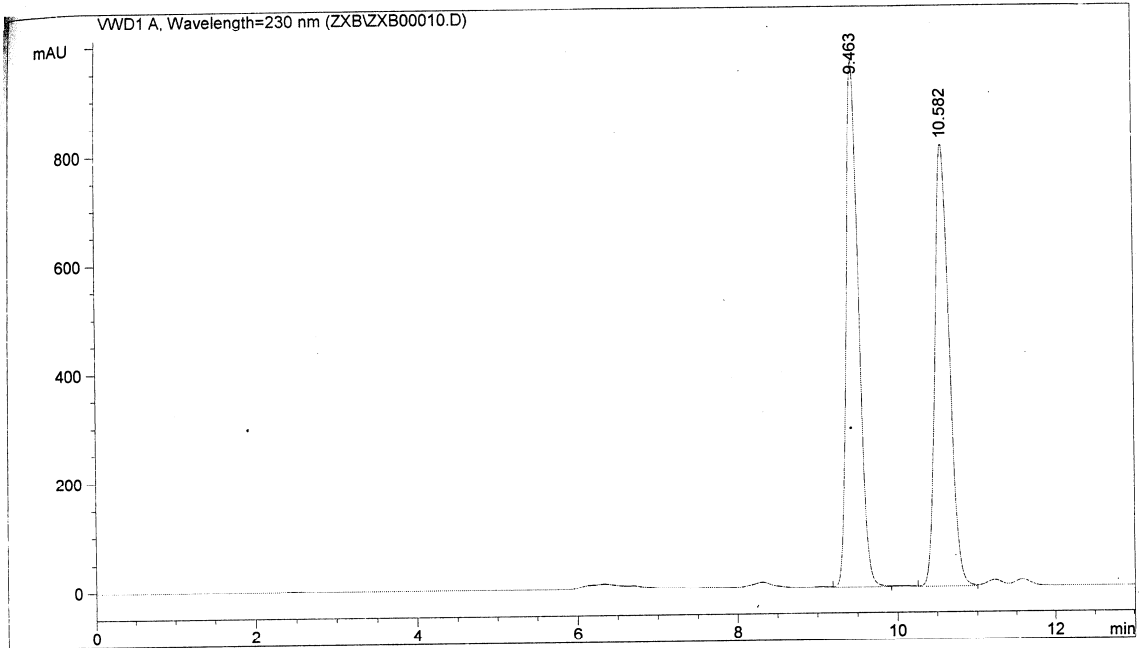

=====  
Area Percent Report  
=====

Sorted By : Signal  
Multiplier : 1.0000  
Dilution : 1.0000  
Use Multiplier & Dilution Factor with ISTDs

Signal 1: VWD1 A, Wavelength=230 nm

| Peak # | RetTime [min] | Type | Width [min] | Area mAU  | Height [mAU] | Area %  |
|--------|---------------|------|-------------|-----------|--------------|---------|
| 1      | 9.463         | VV   | 0.1632      | 1.01411e4 | 966.16229    | 50.0983 |
| 2      | 10.582        | VV   | 0.1934      | 1.01013e4 | 810.89063    | 49.9017 |

Totals : 2.02423e4 1777.05292

Results obtained with enhanced integrator!

=====  
\*\*\* End of Report \*\*\*

hexane/i-propanol=95/5; 230nm; 0.5 ml/min; AS-H

=====  
Injection Date : 4/24/2008 8:23:09 PM  
Sample Name : zxb-1-144  
Acq. Operator : zxb  
Acq. Method : D:\HPCHEM\1\METHODS\ERIC.M  
Last changed : 4/24/2008 7:53:31 PM by zxb  
(modified after loading)  
Analysis Method : D:\HPCHEM\1\METHODS\ERIC.M  
Last changed : 4/24/2008 8:44:47 PM by mao  
(modified after loading)

Location : -

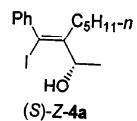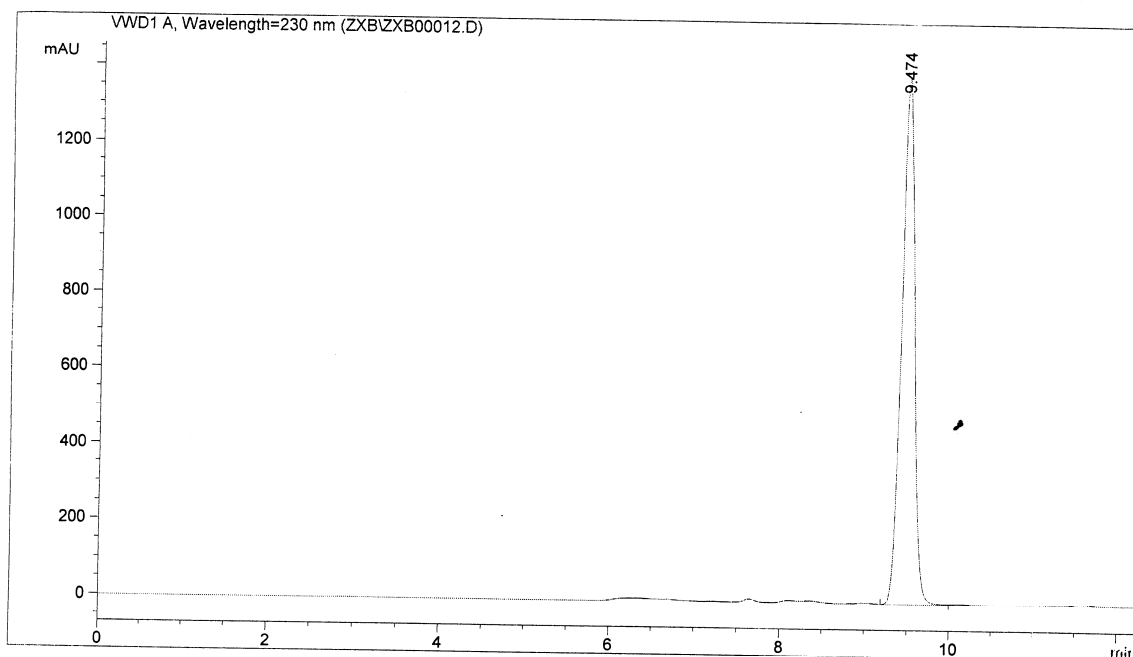

=====  
Area Percent Report  
=====

Sorted By : Signal  
Multiplier : 1.0000  
Dilution : 1.0000  
Use Multiplier & Dilution Factor with ISTDs

Signal 1: VWD1 A, Wavelength=230 nm

| Peak # | RetTime [min] | Type | Width [min] | Area mAU*s | Height [mAU] | Area %   |
|--------|---------------|------|-------------|------------|--------------|----------|
| 1      | 9.474         | VV   | 0.1640      | 1.46850e4  | 1390.35144   | 100.0000 |

Totals : 1.46850e4 1390.35144

Results obtained with enhanced integrator!

=====  
\*\*\* End of Report \*\*\*  
=====

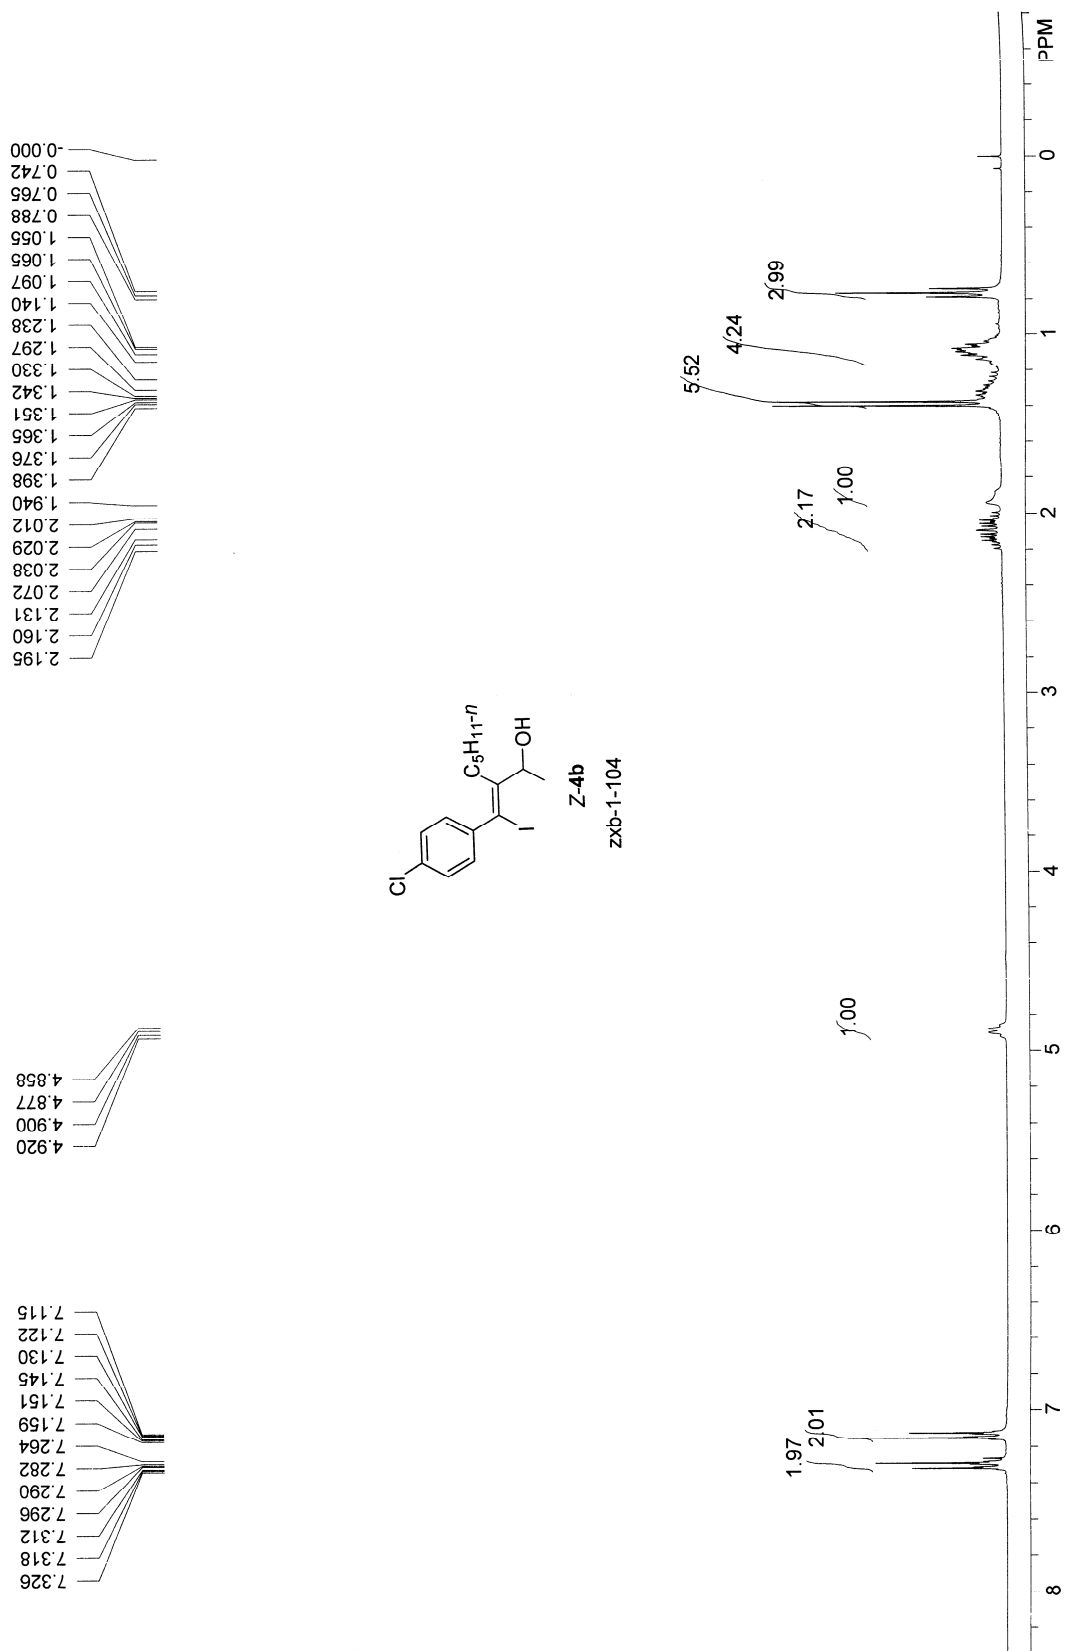

13.834  
21.228  
22.012  
28.881  
29.761  
31.826

76.576  
76.859  
77.000  
77.424

94.071

128.459  
129.536  
133.328

142.925

150.156

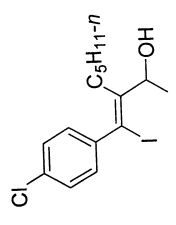

Z-4b  
zxb-1-104-c

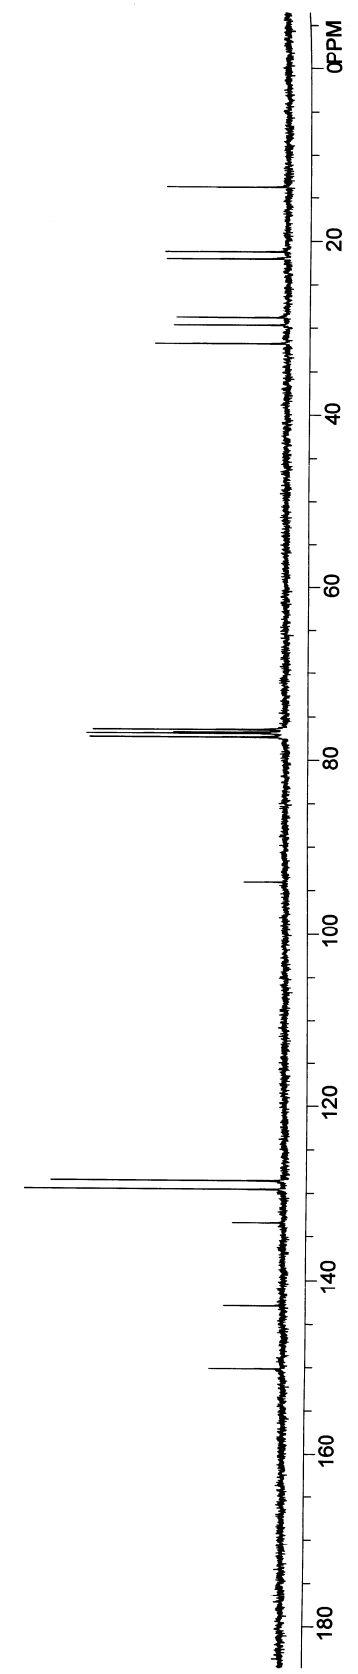



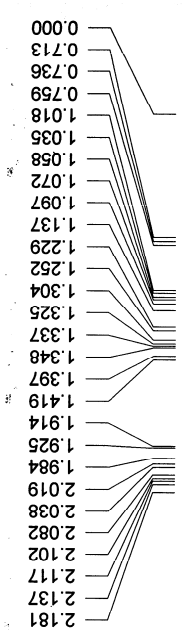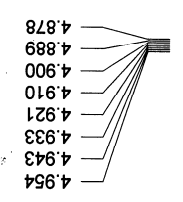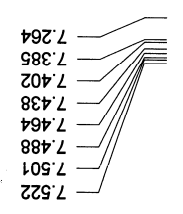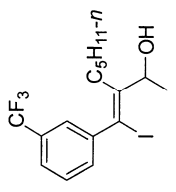

Z-4c  
zxb-1-176

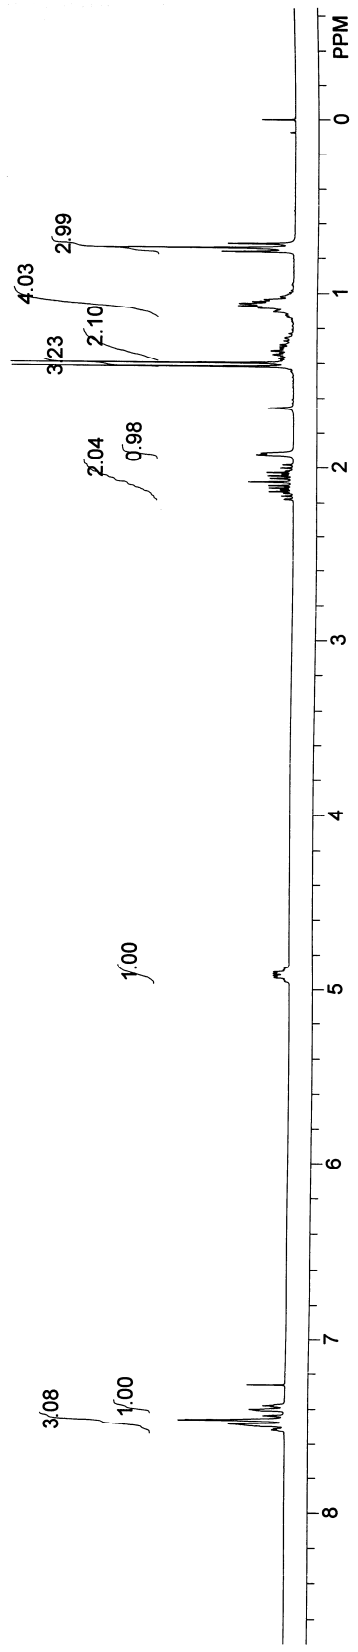

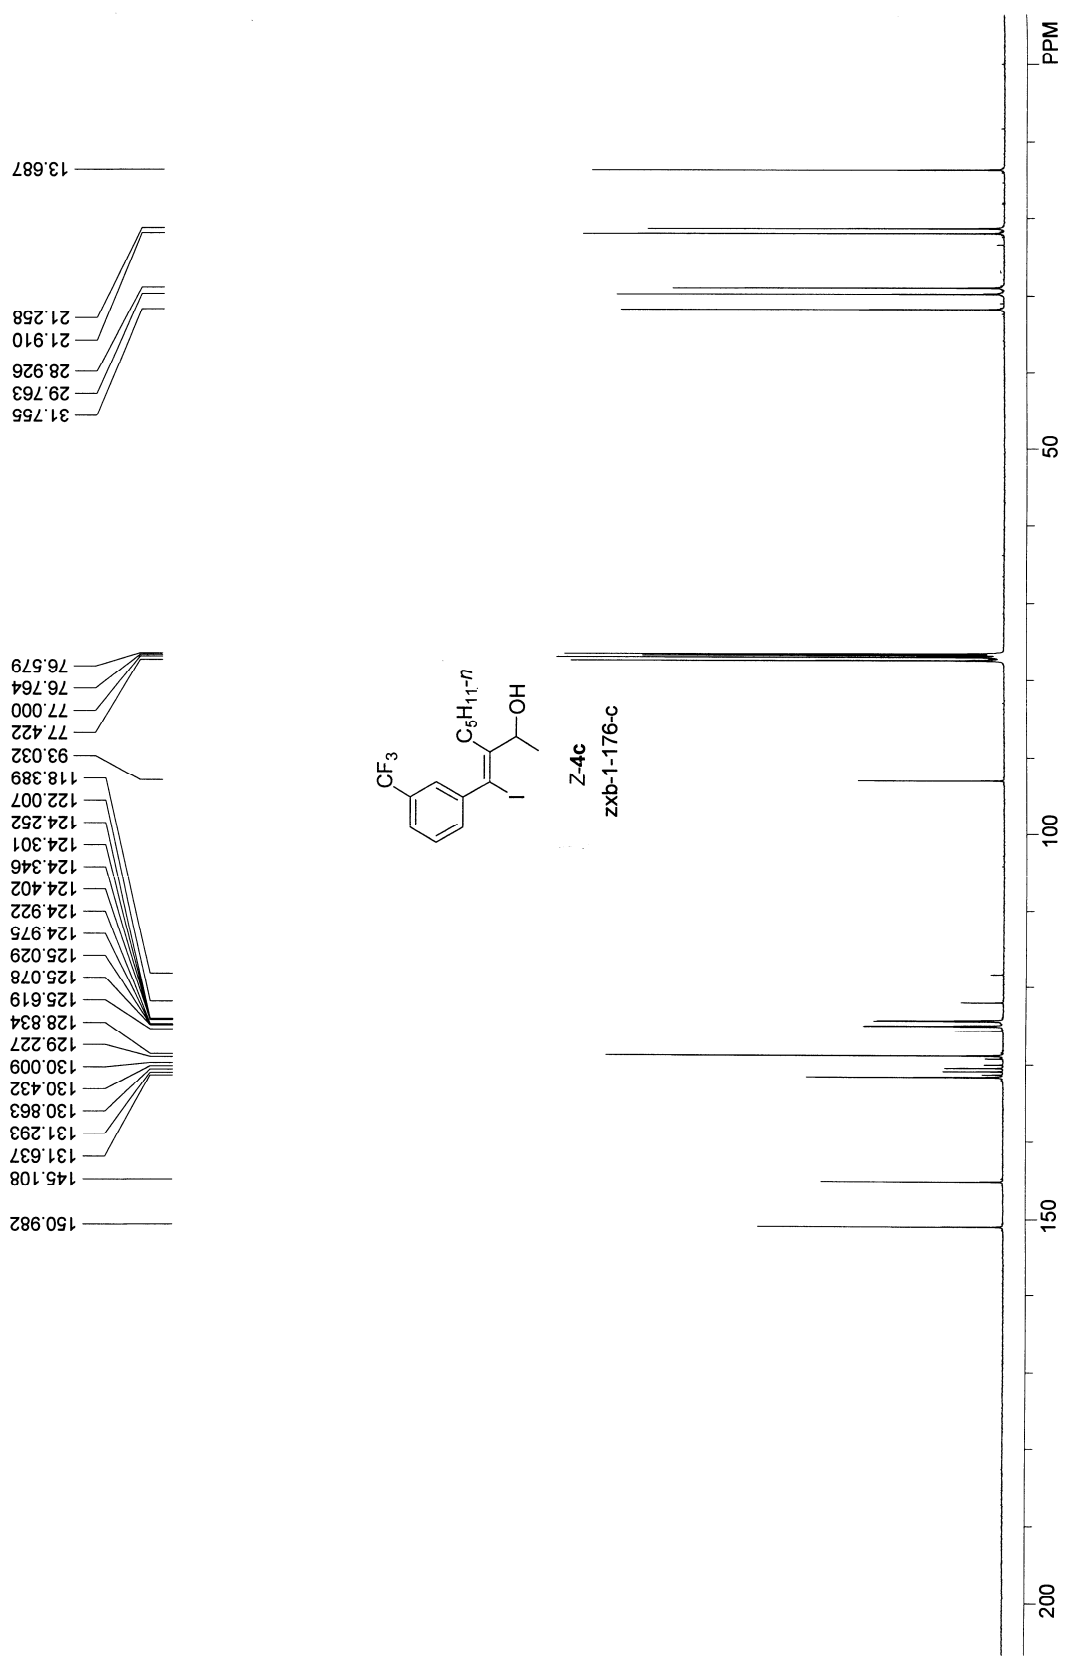

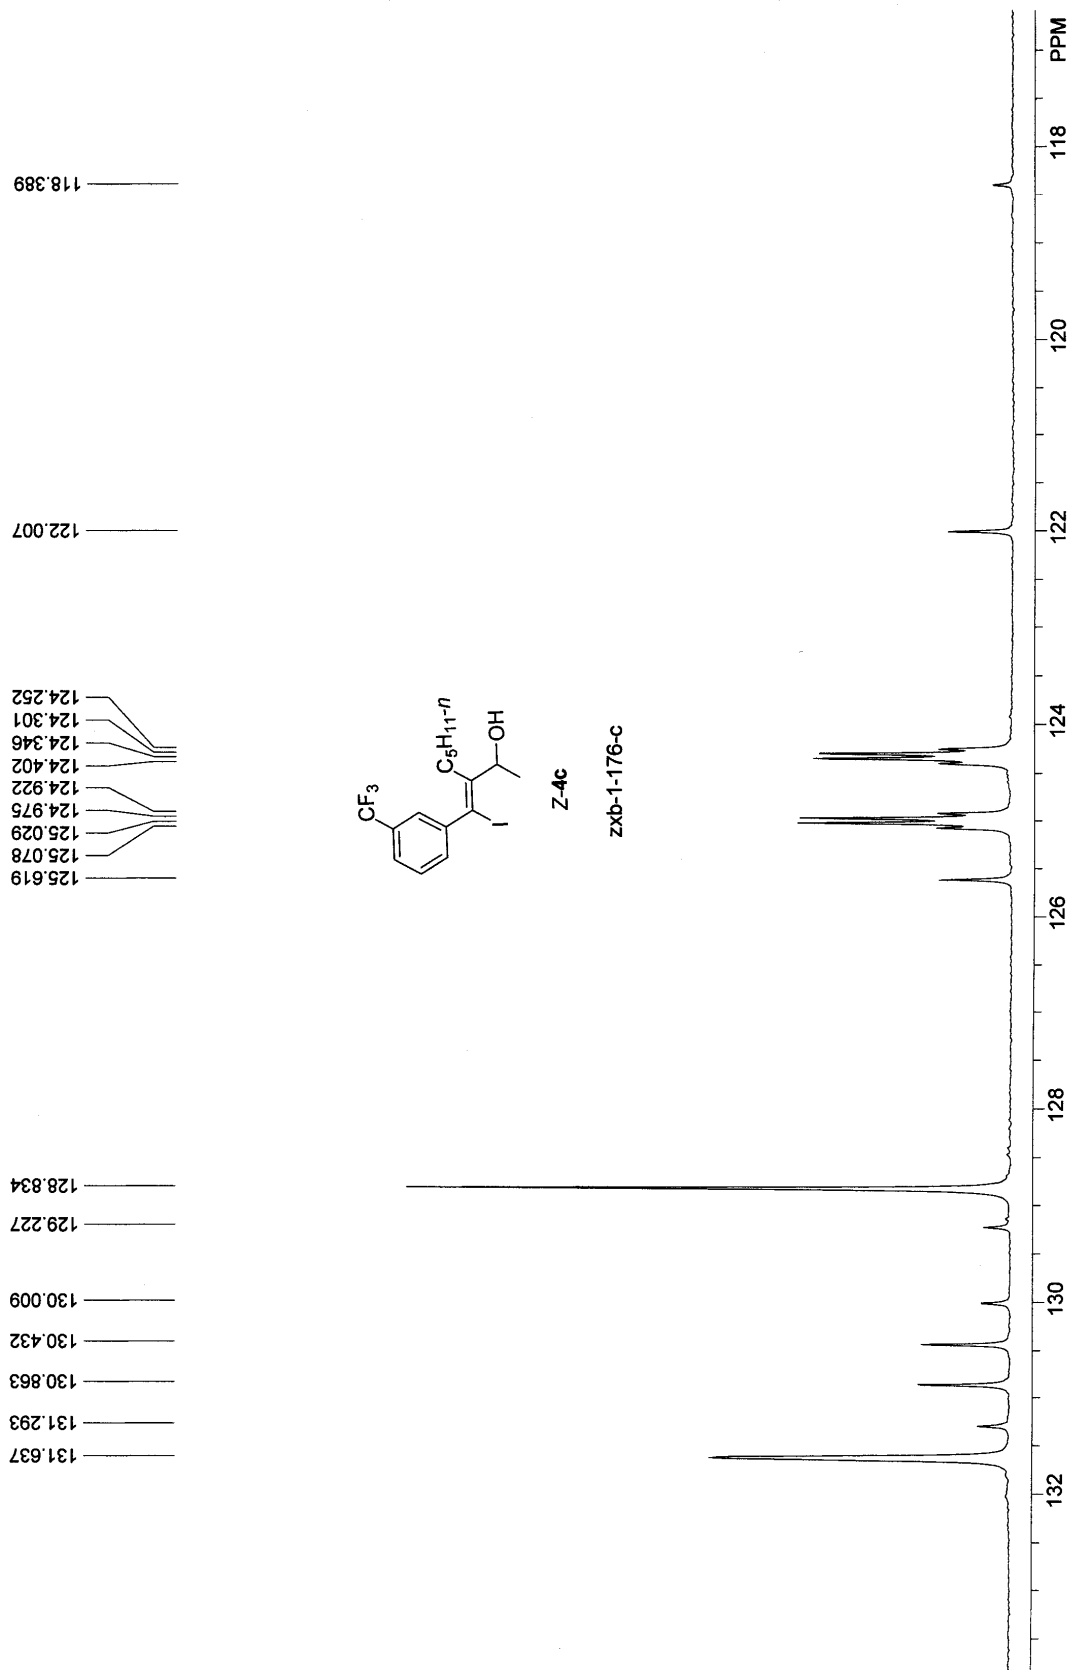

62.763

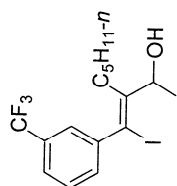

Z-4c

zxb-1-176-f

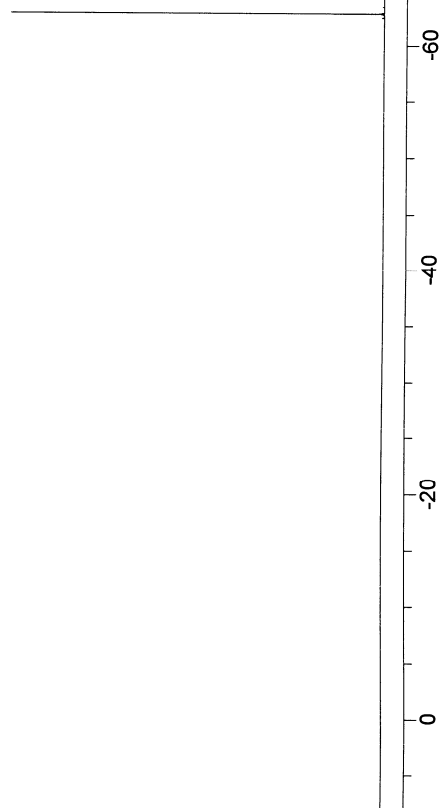

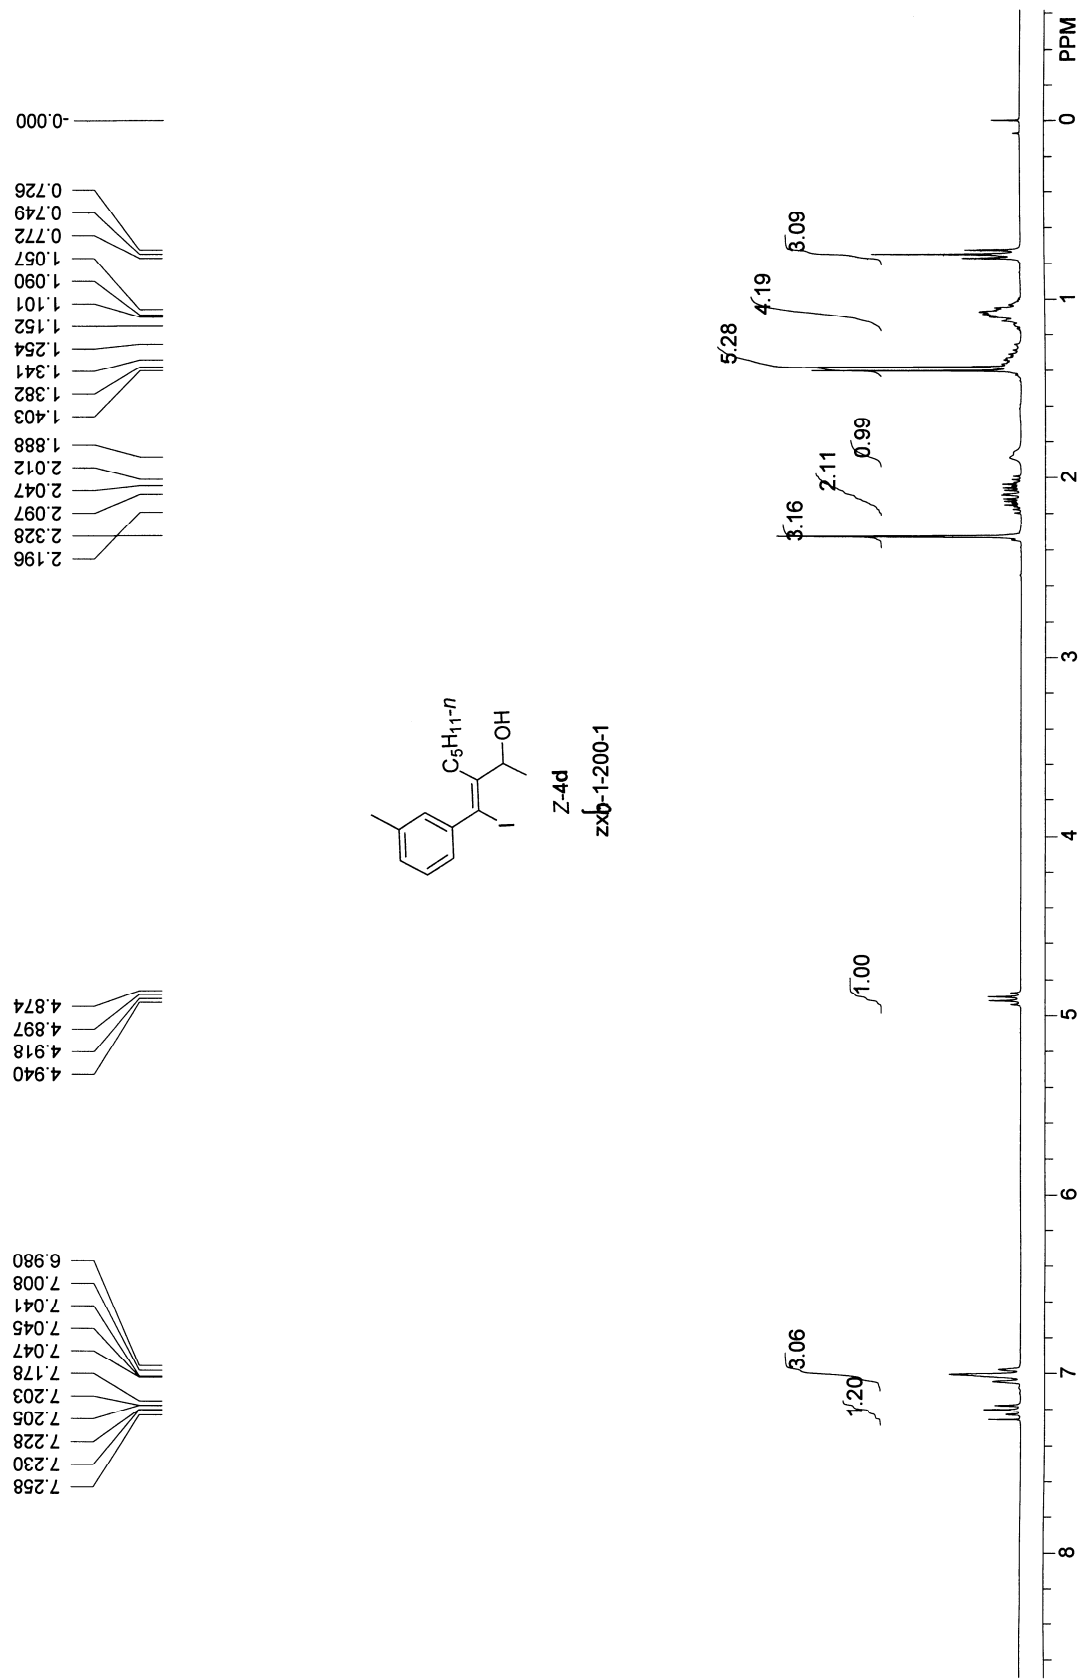

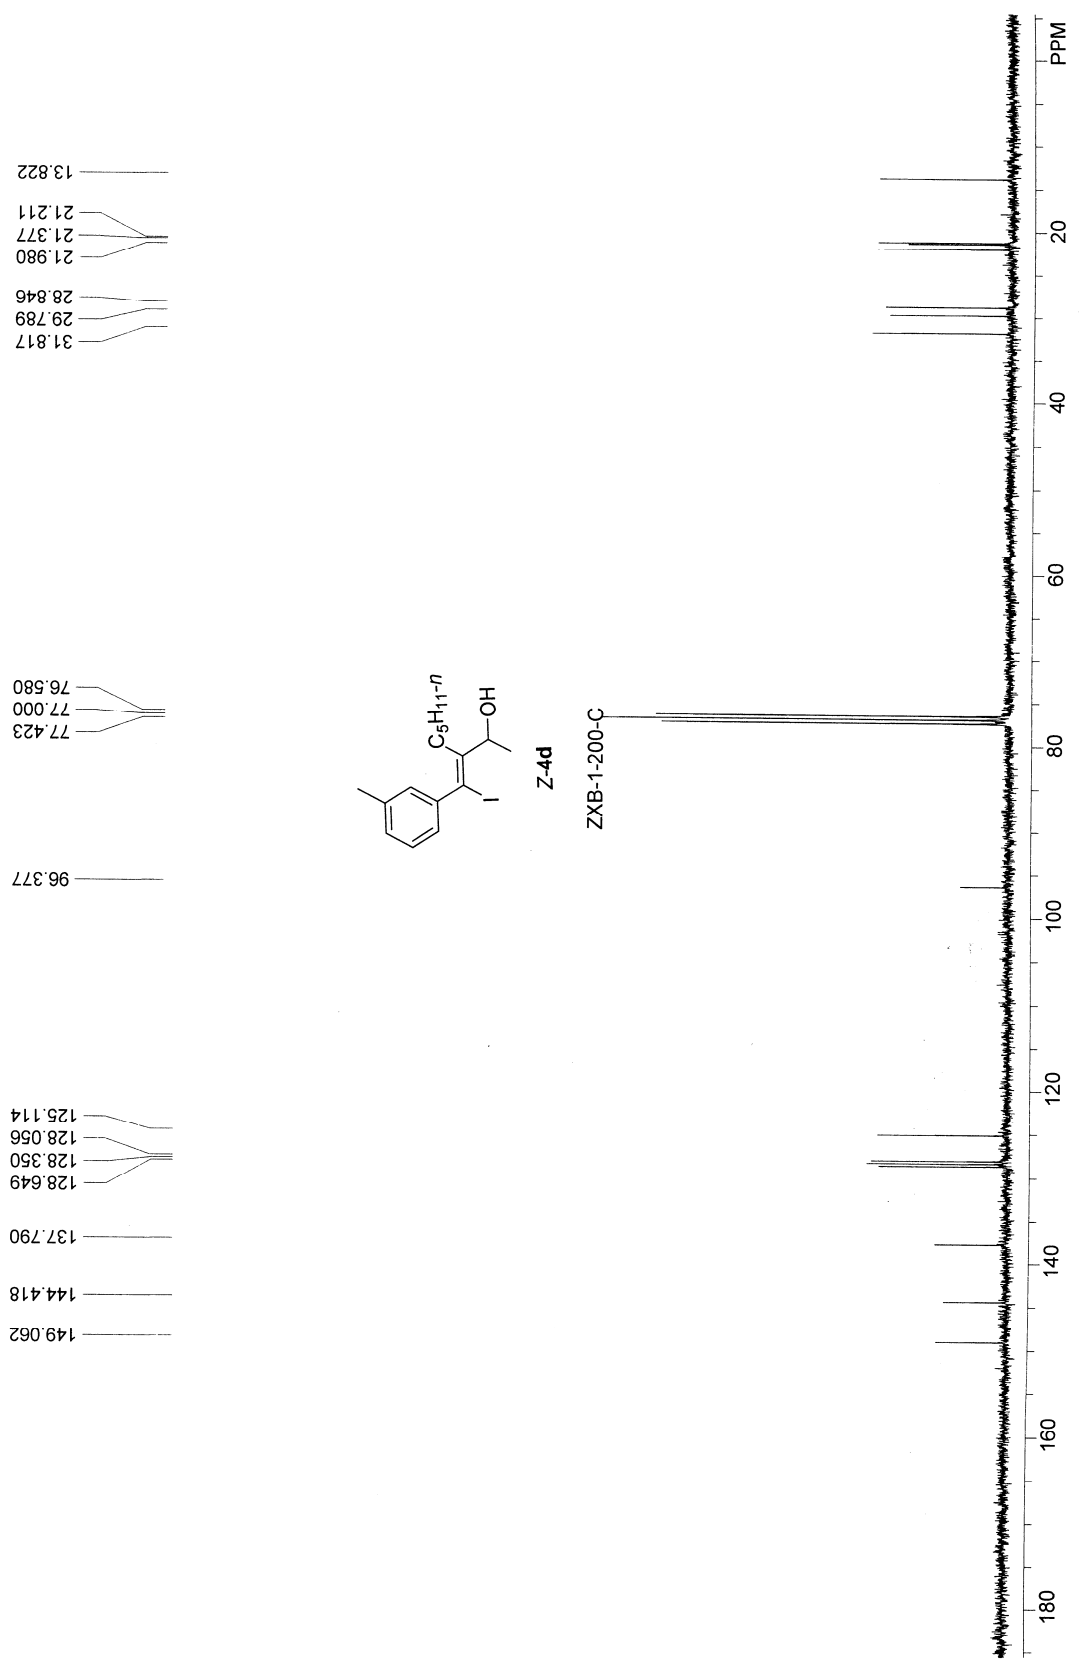

0.000  
 0.729  
 0.753  
 0.775  
 1.049  
 1.072  
 1.080  
 1.090  
 1.110  
 1.124  
 1.312  
 1.356  
 1.378  
 1.399  
 1.931  
 2.017  
 2.043  
 2.053  
 2.097  
 2.348  
 2.160  
 2.203

4.870  
 4.891  
 4.913  
 4.933

7.071  
 7.078  
 7.091  
 7.099  
 7.112  
 7.120  
 7.139  
 7.153  
 7.258

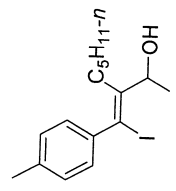

zxb-1-145

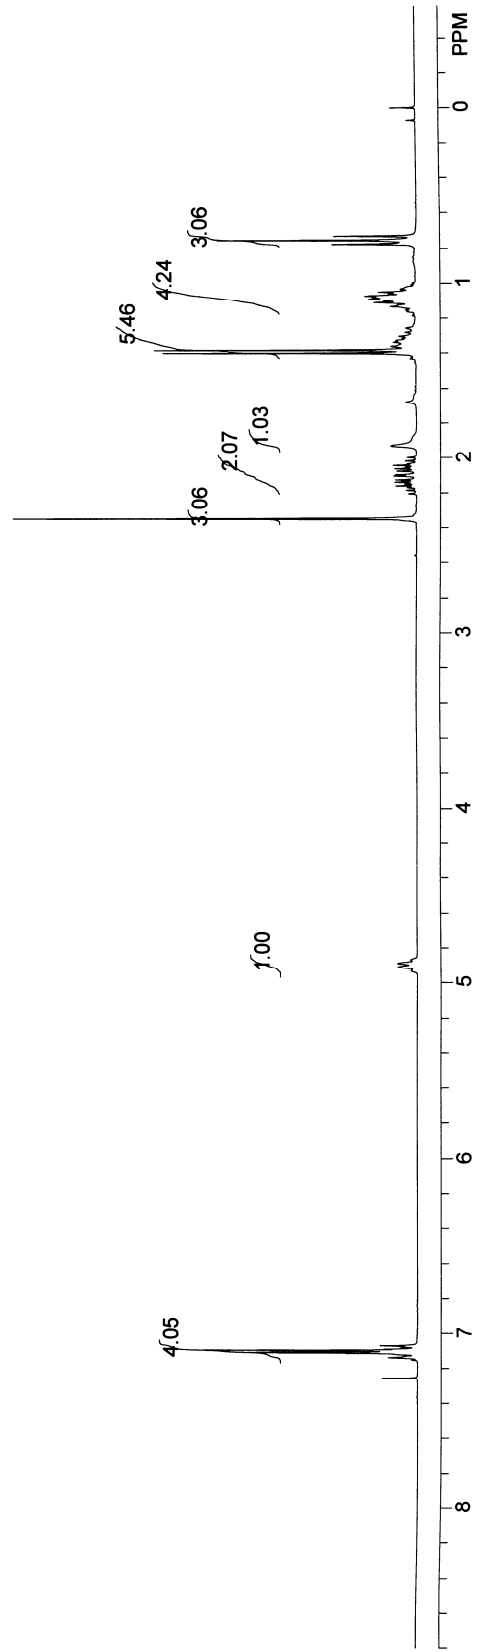

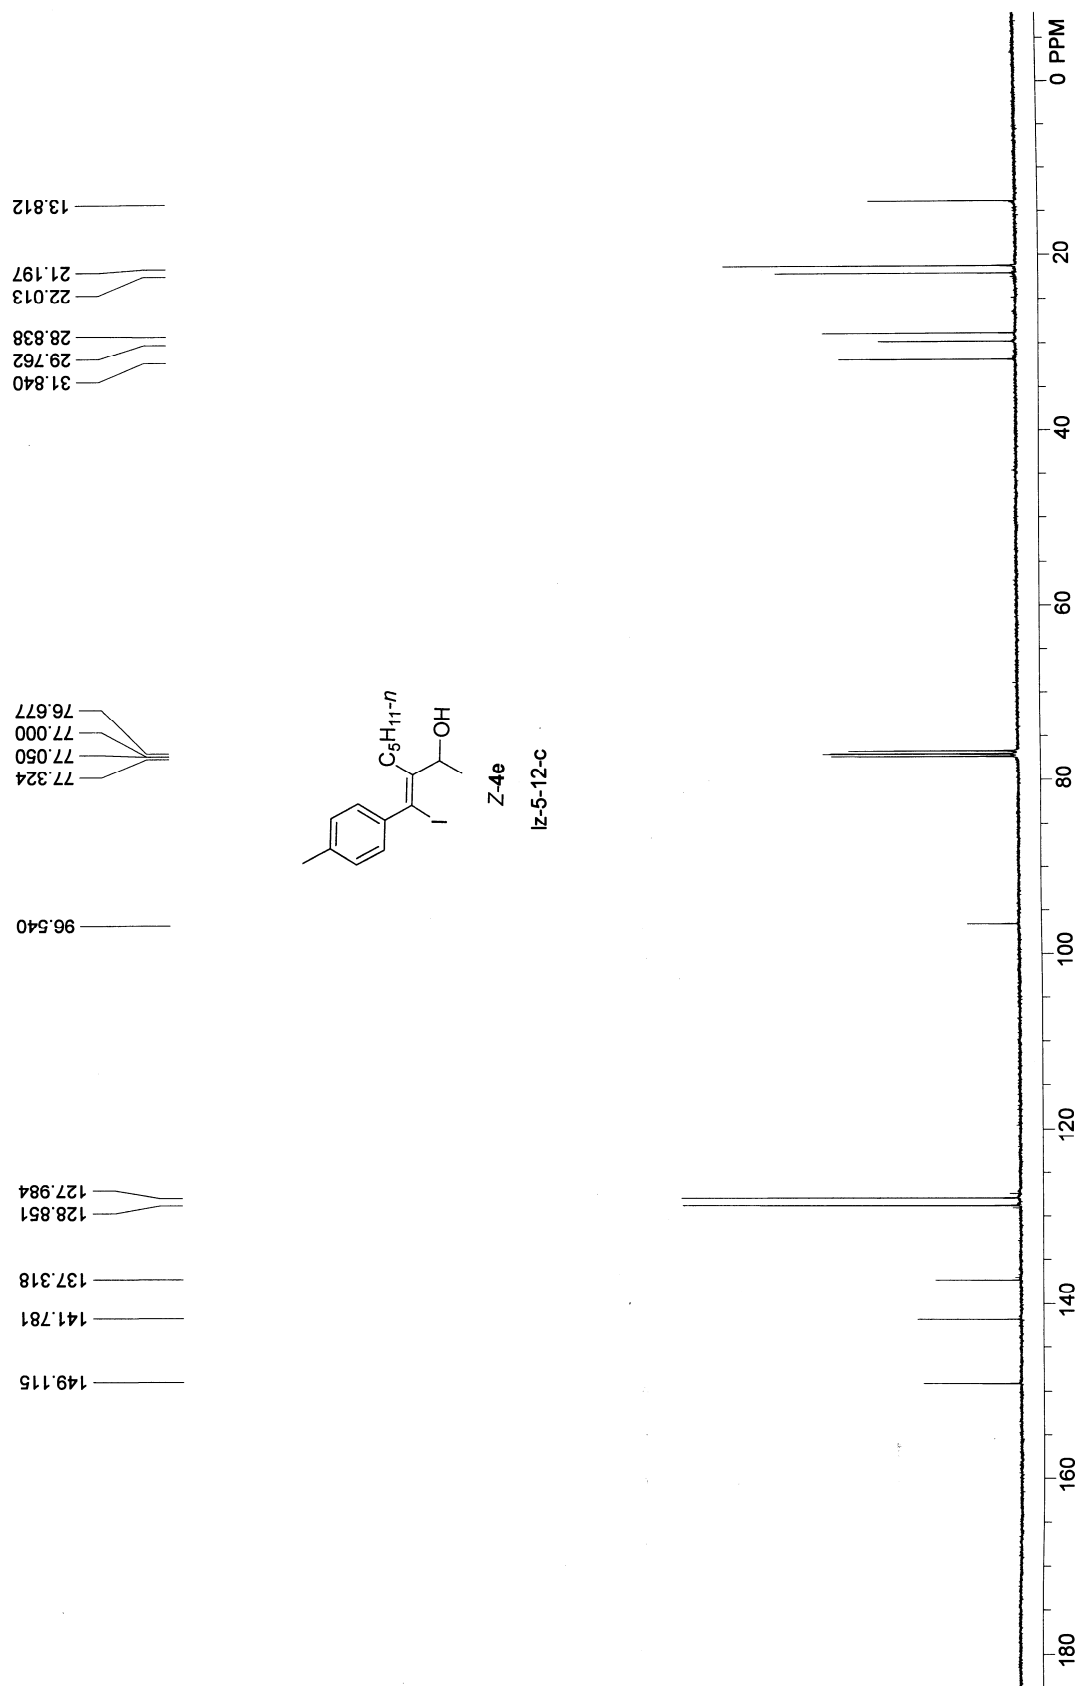



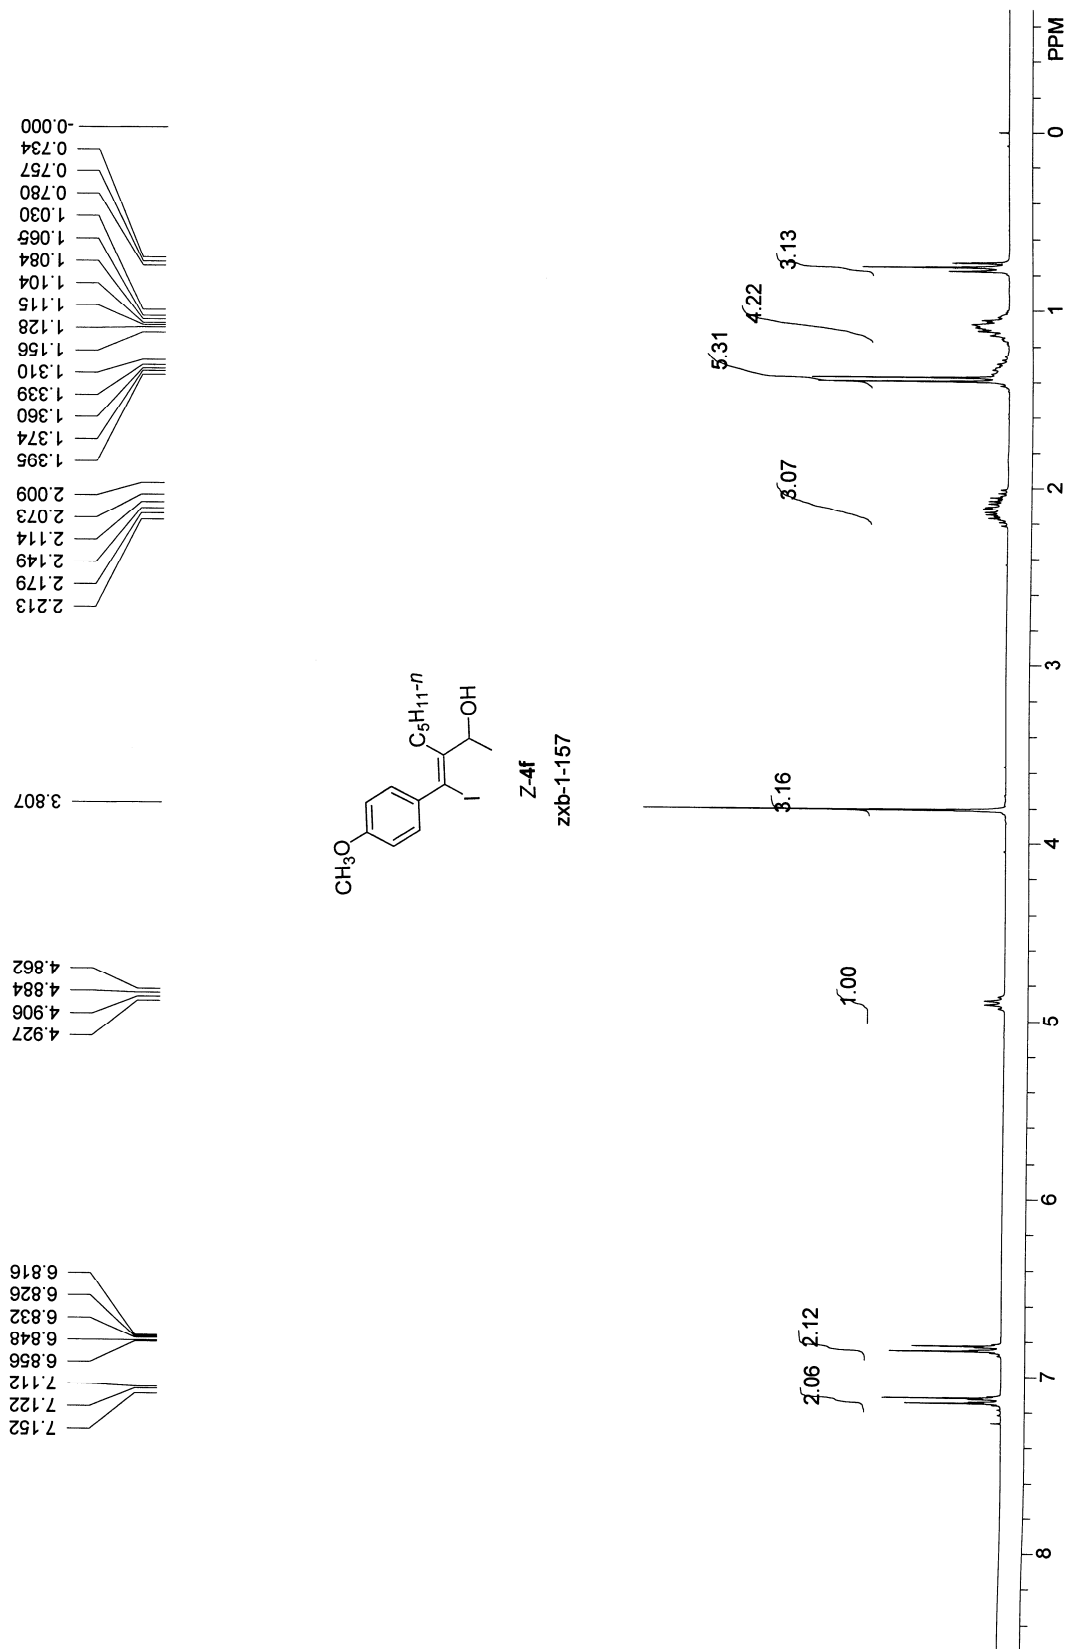

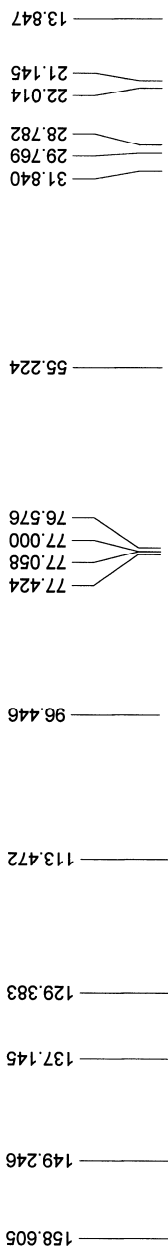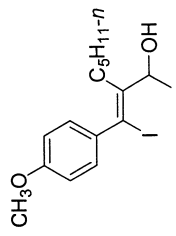

Z-4f  
zxb-1-157-c

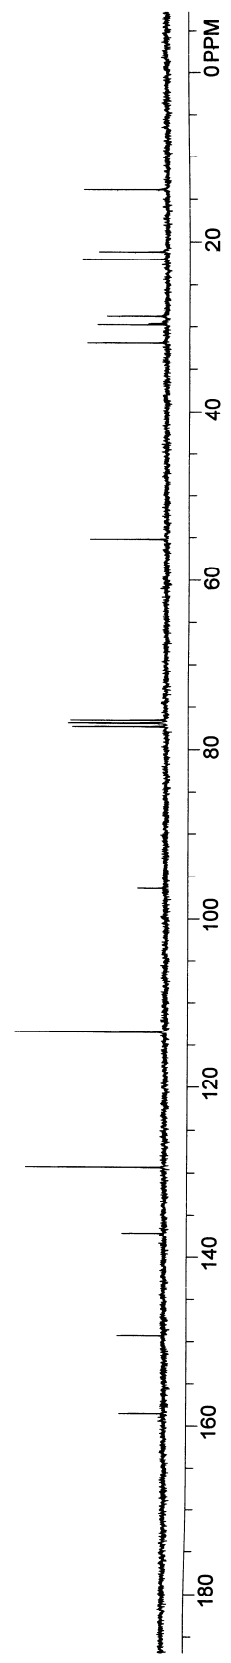

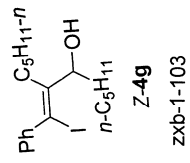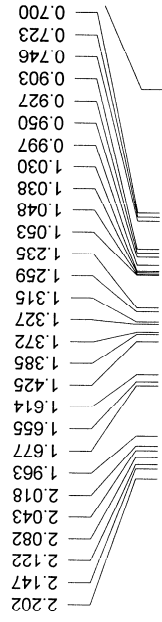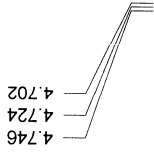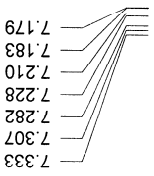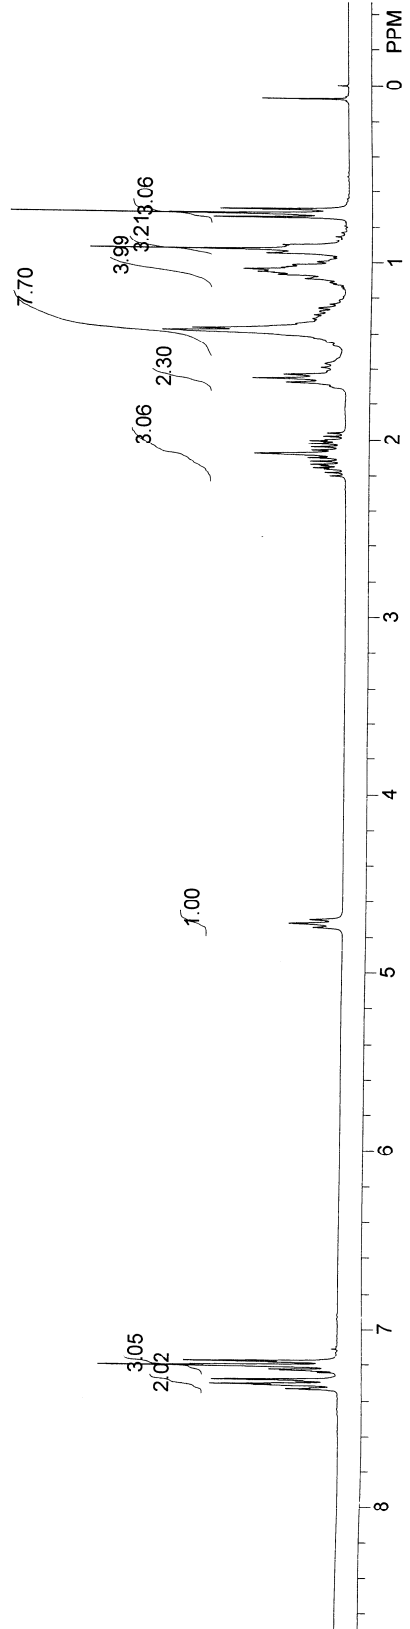

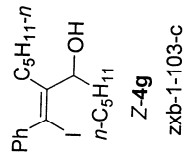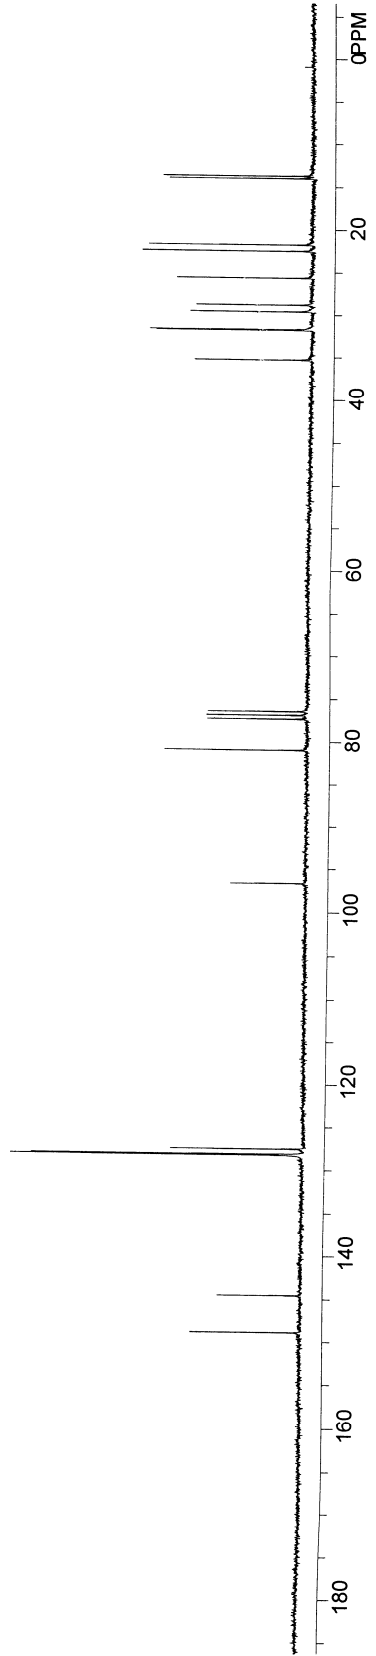

13.793  
 14.062  
 21.890  
 22.611  
 25.713  
 28.932  
 29.686  
 31.725  
 31.803  
 35.334

76.575  
 77.000  
 77.424  
 80.947

96.654

127.463  
 128.042  
 128.139

144.584  
 148.909

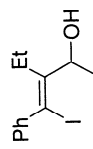

Z-4h  
ZXB-1-93

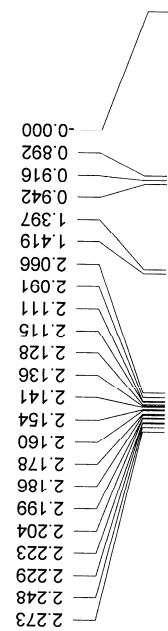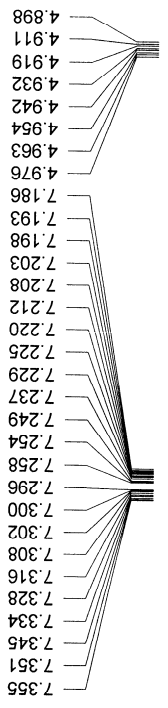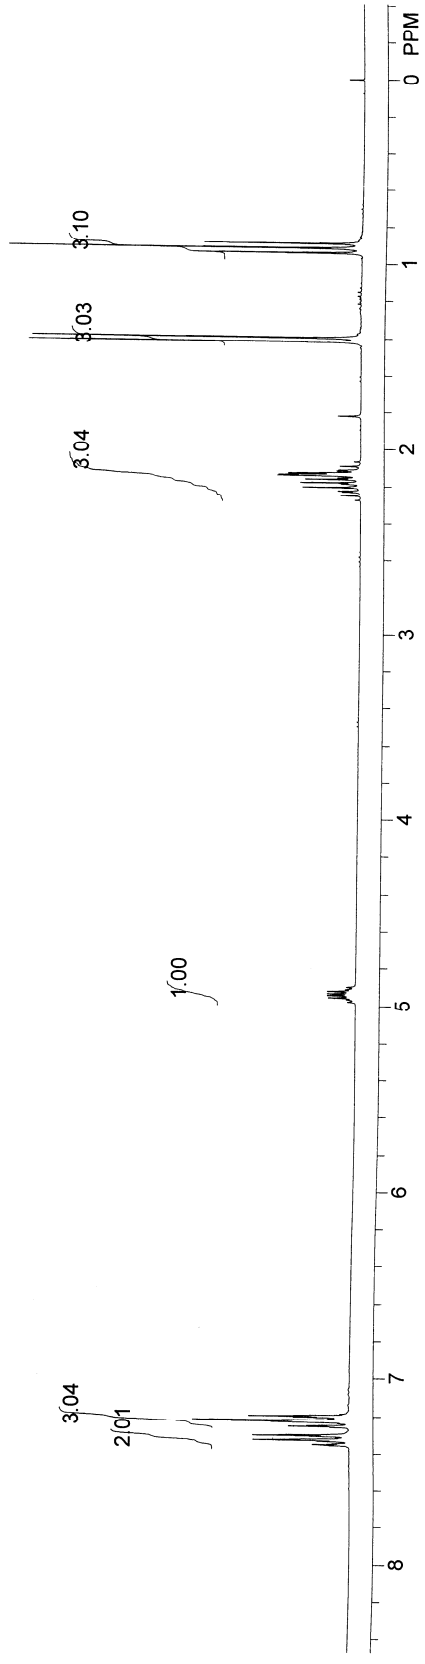

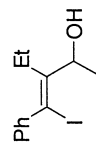

Z-4h

ZXB-1-93

21.874  
21.233  
15.019

77.436  
77.000  
76.585

95.899

128.232  
127.992  
127.548

144.421

150.340

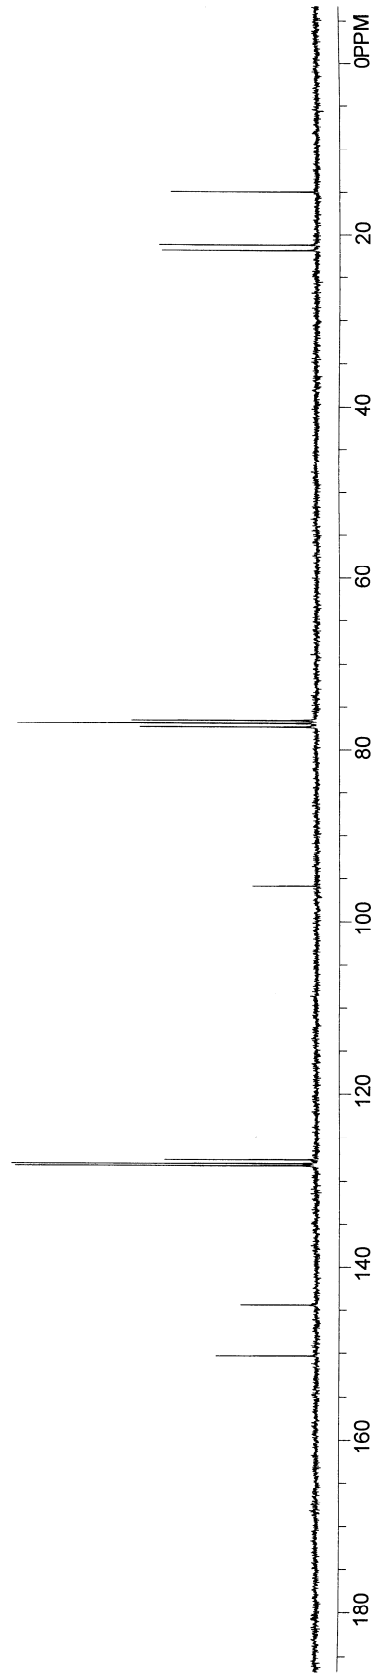

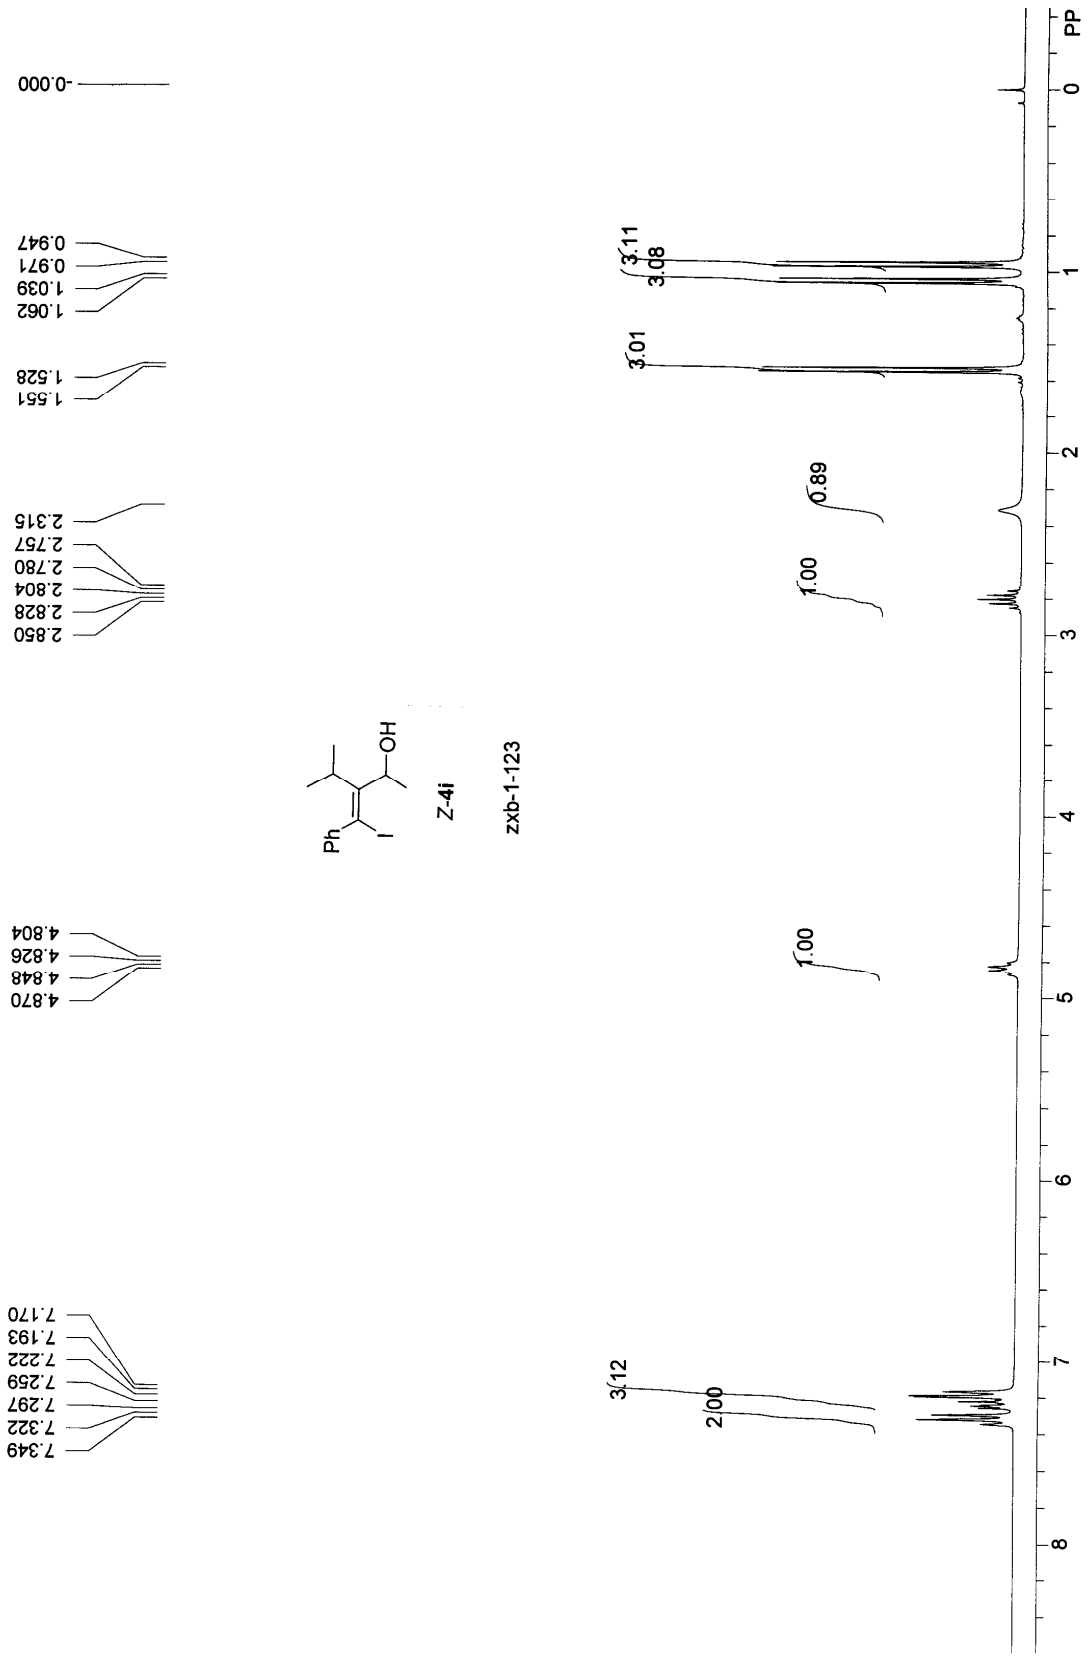

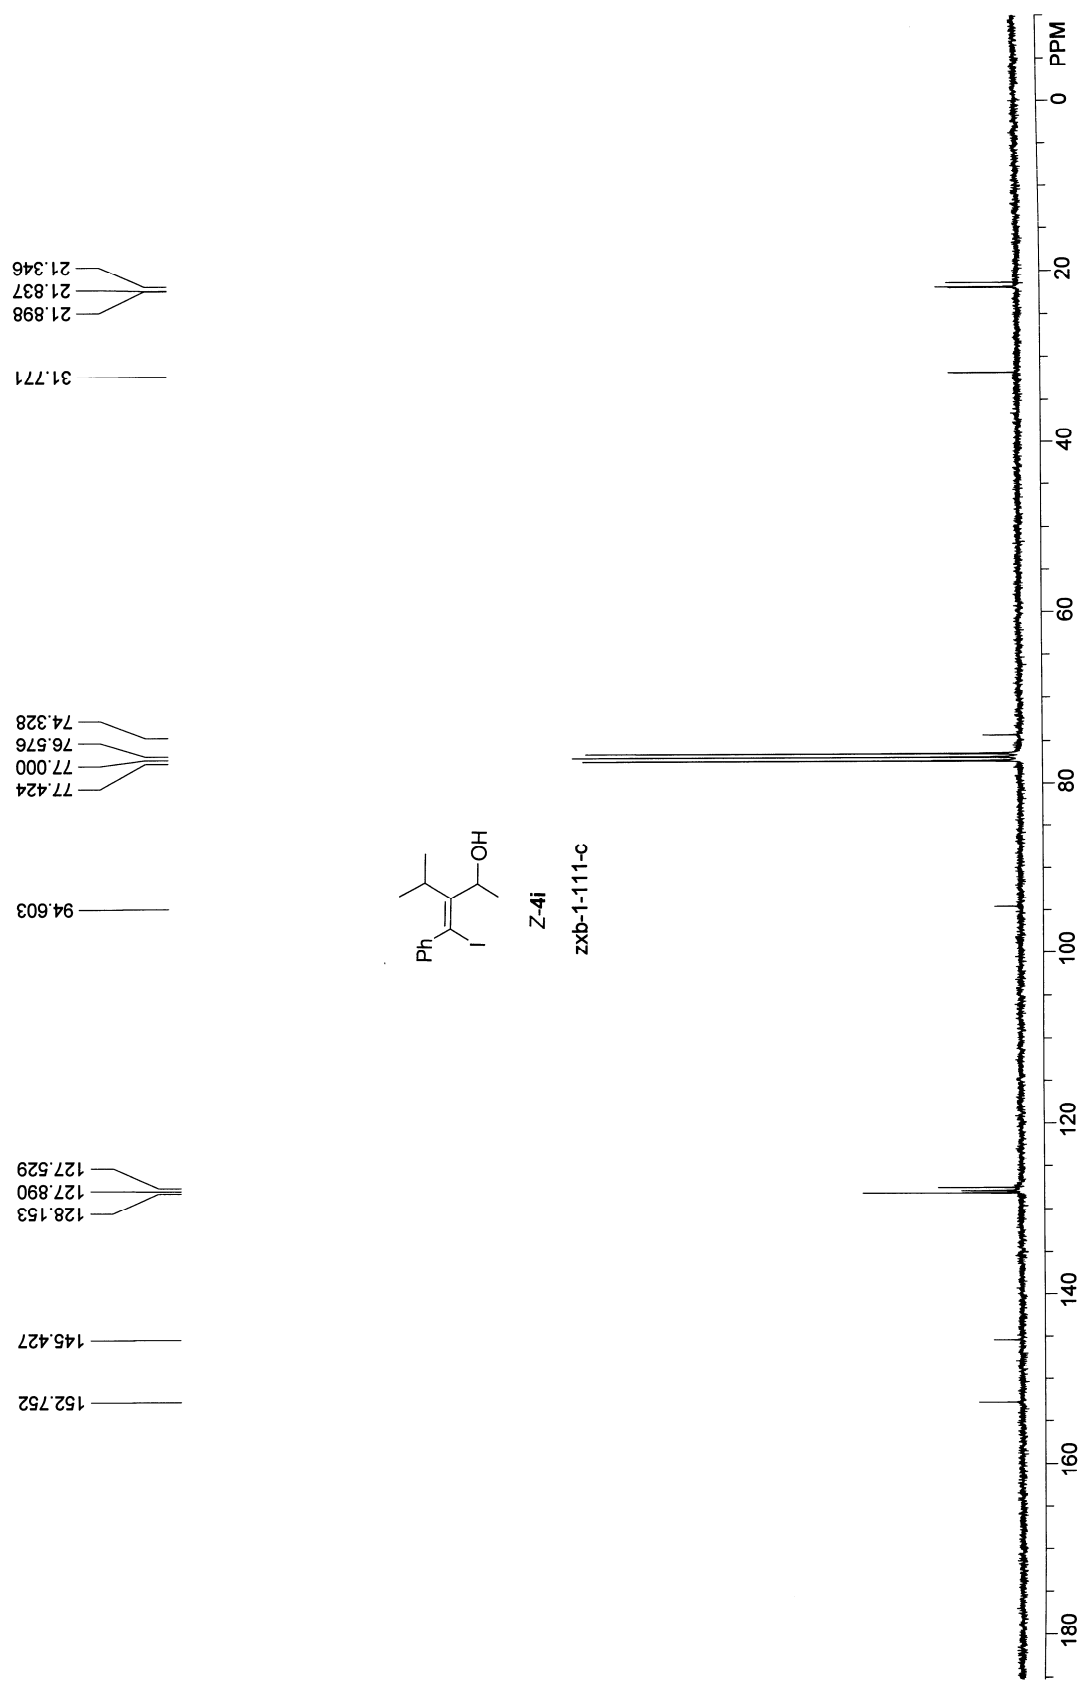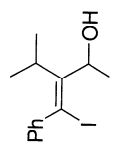

Z-4j  
zxb-1-111-c



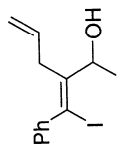

Z-4j

ZXB-1-84

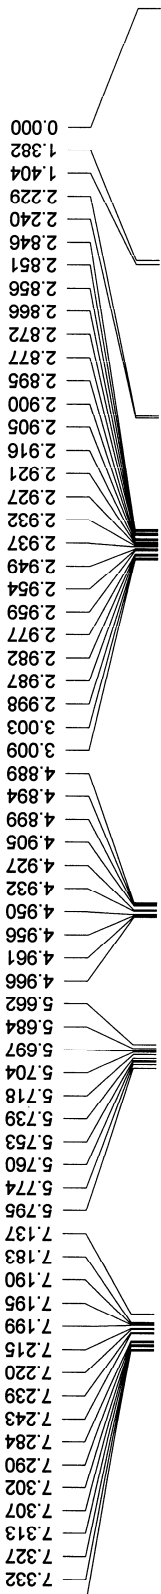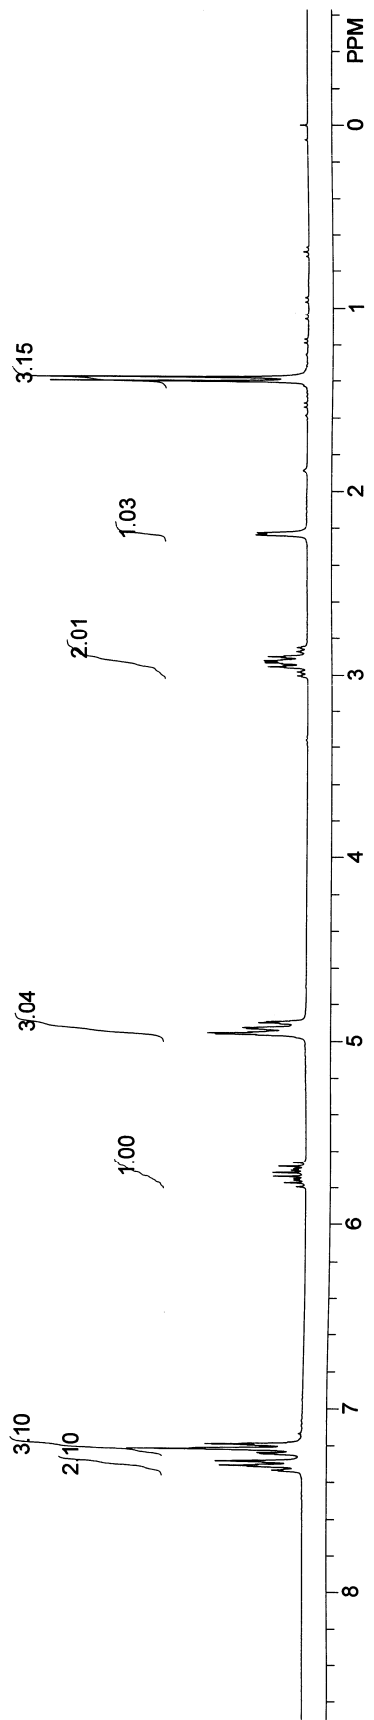

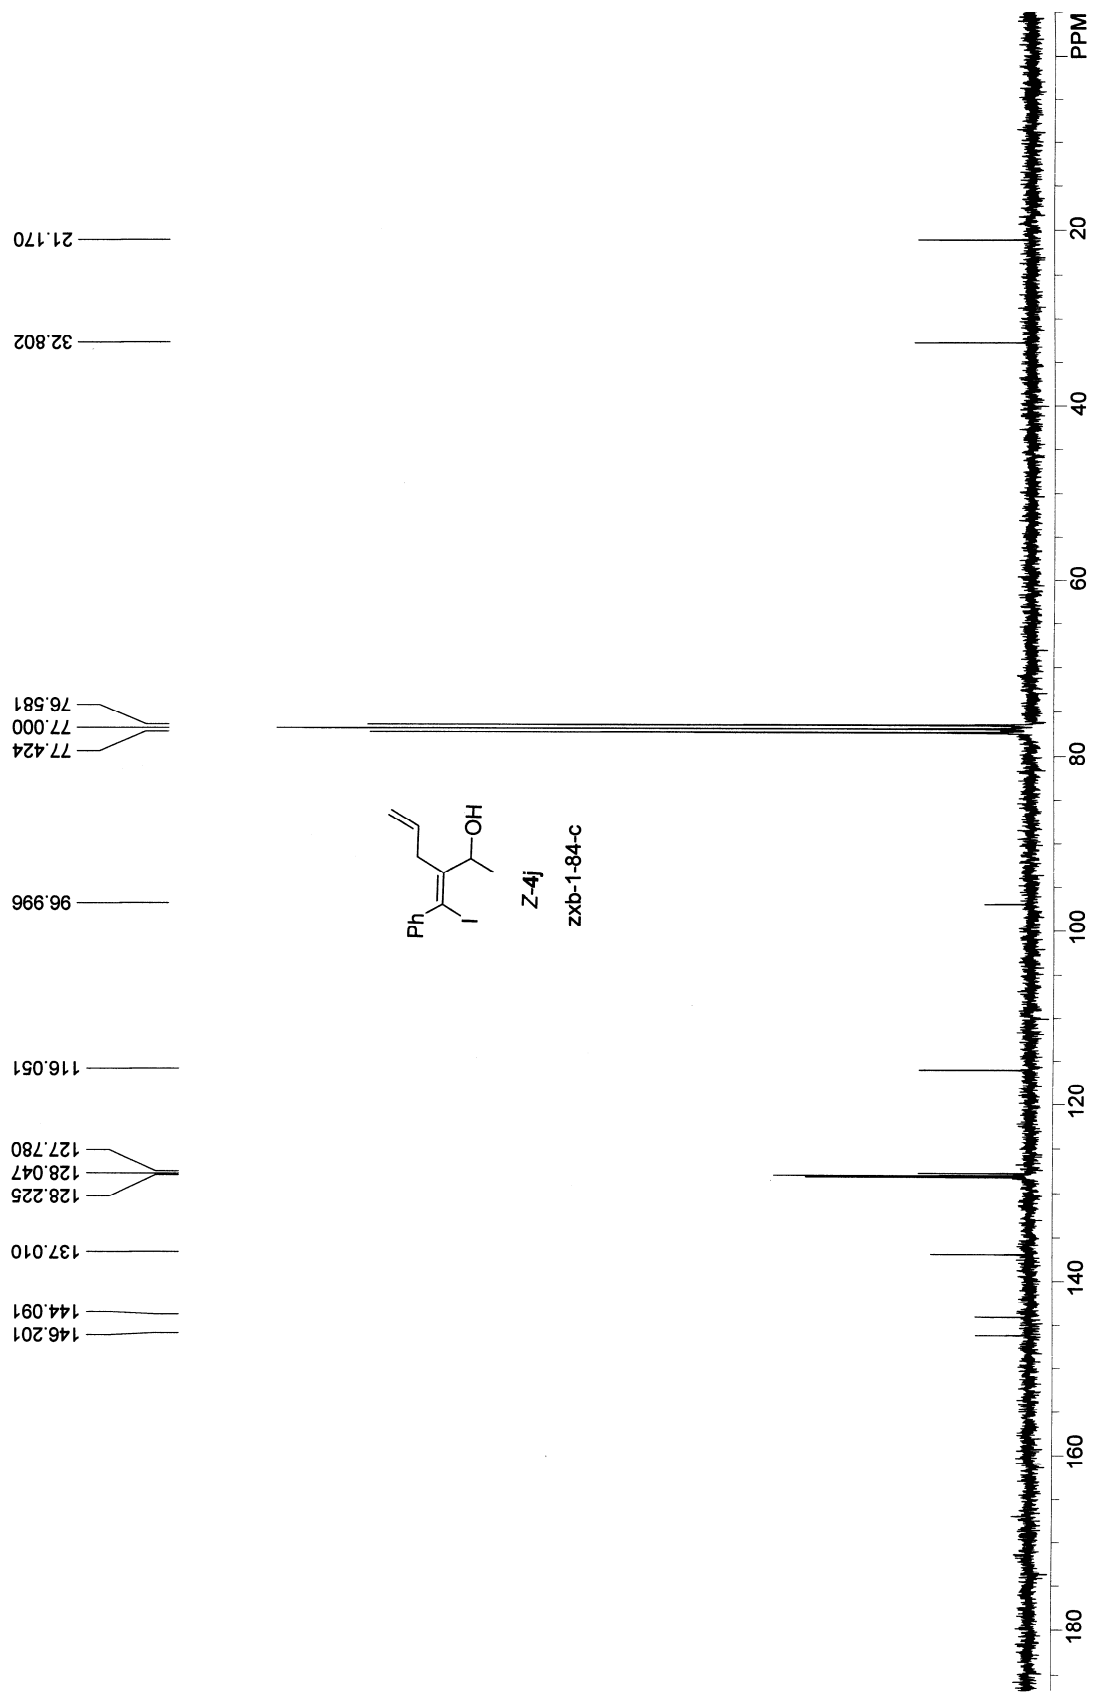

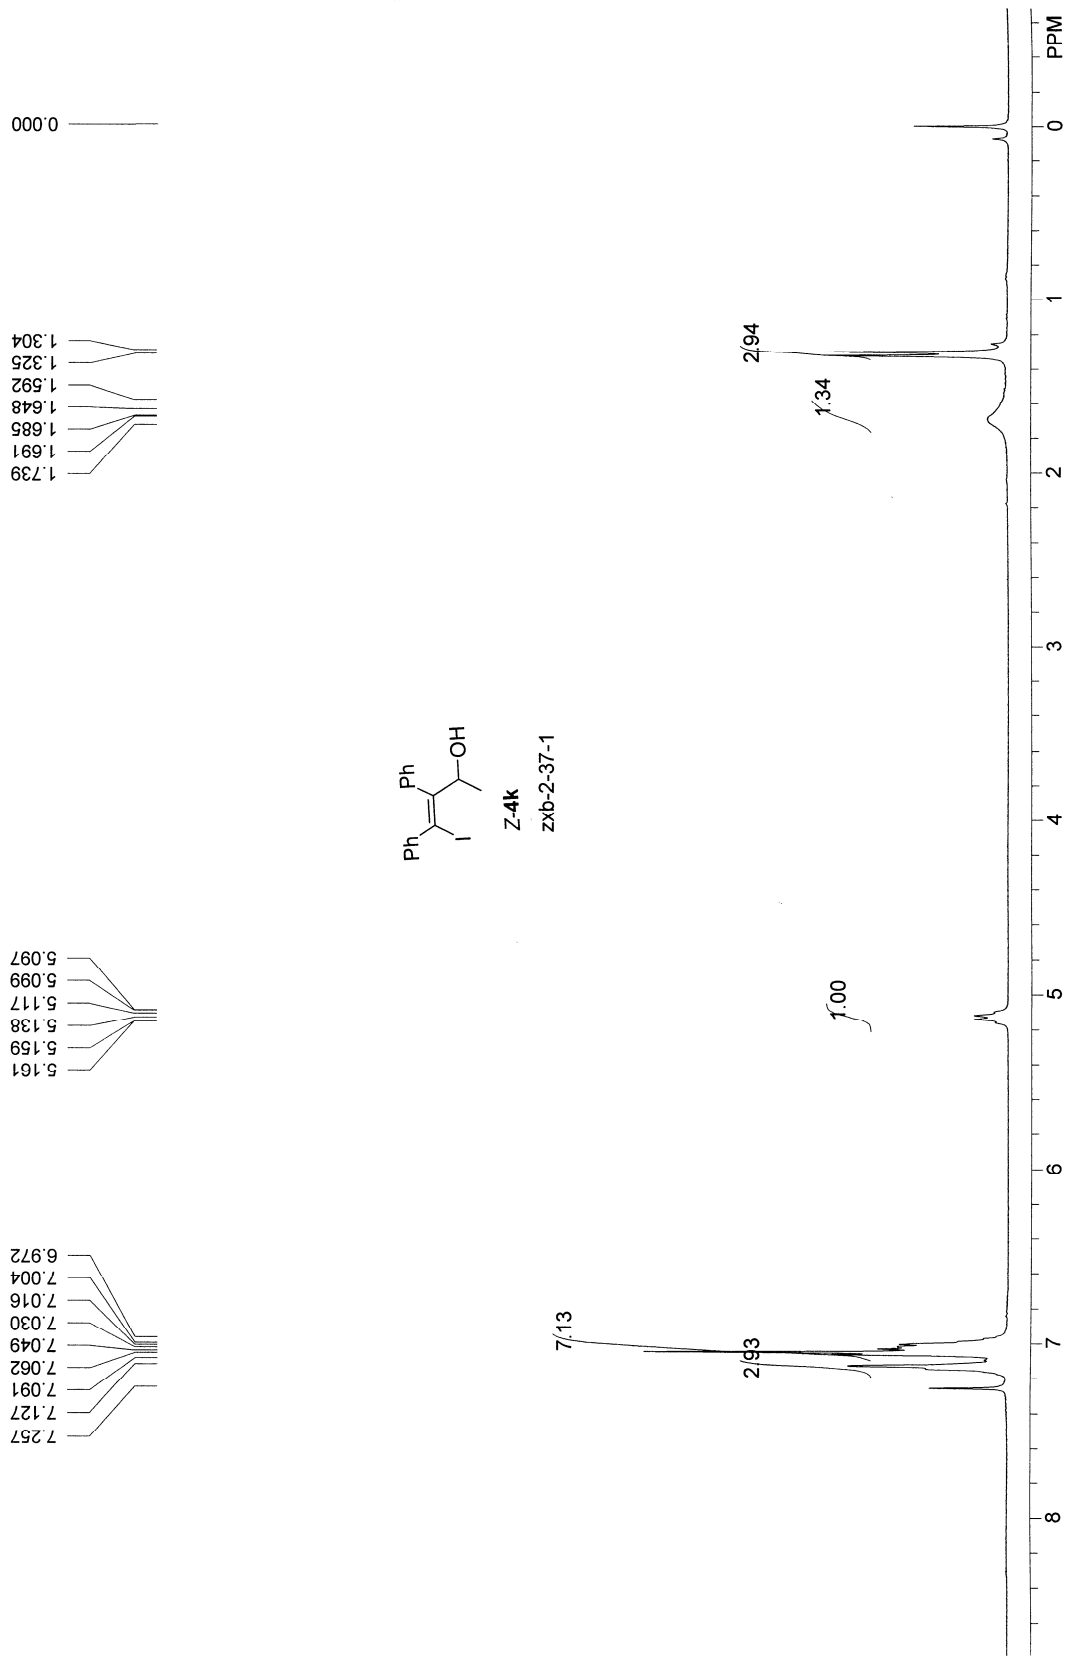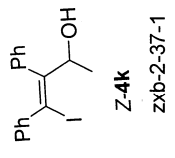

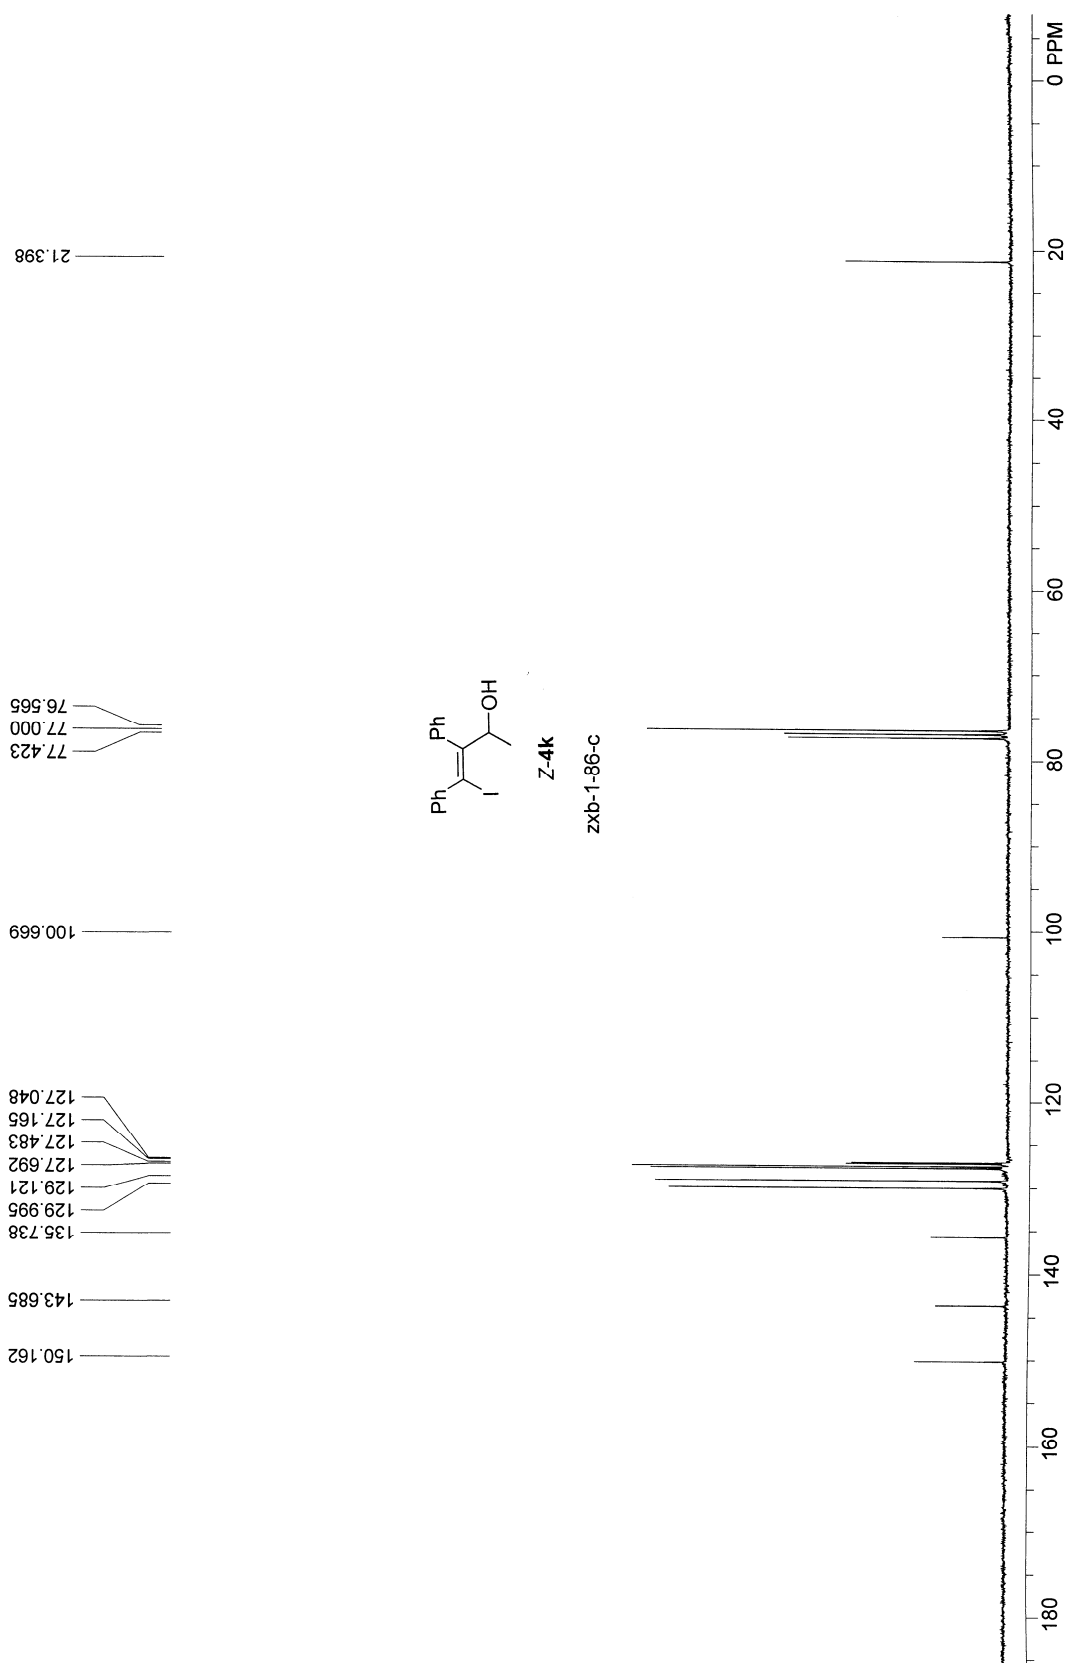

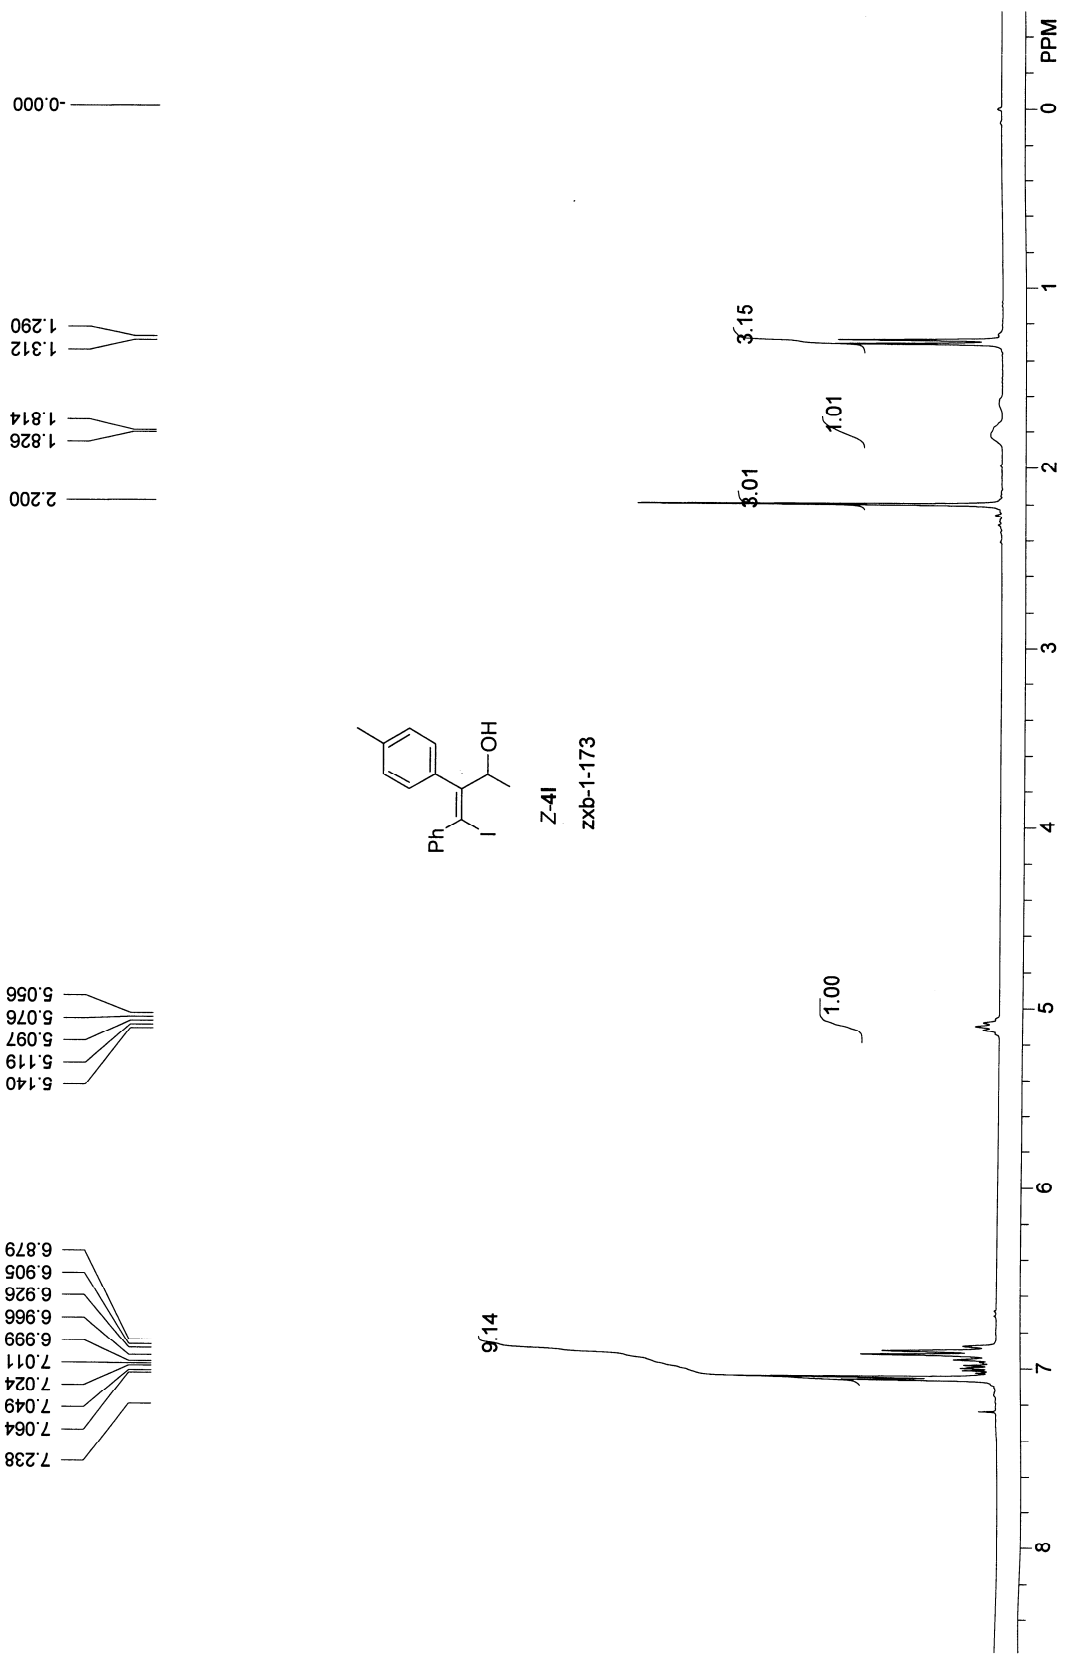

21.438  
21.067

77.419  
77.000  
76.588

100.389

150.144  
143.874  
136.692  
132.578  
129.818  
129.178  
128.475  
127.496  
127.079

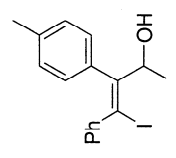

Z-4I

zxb-1-173-c

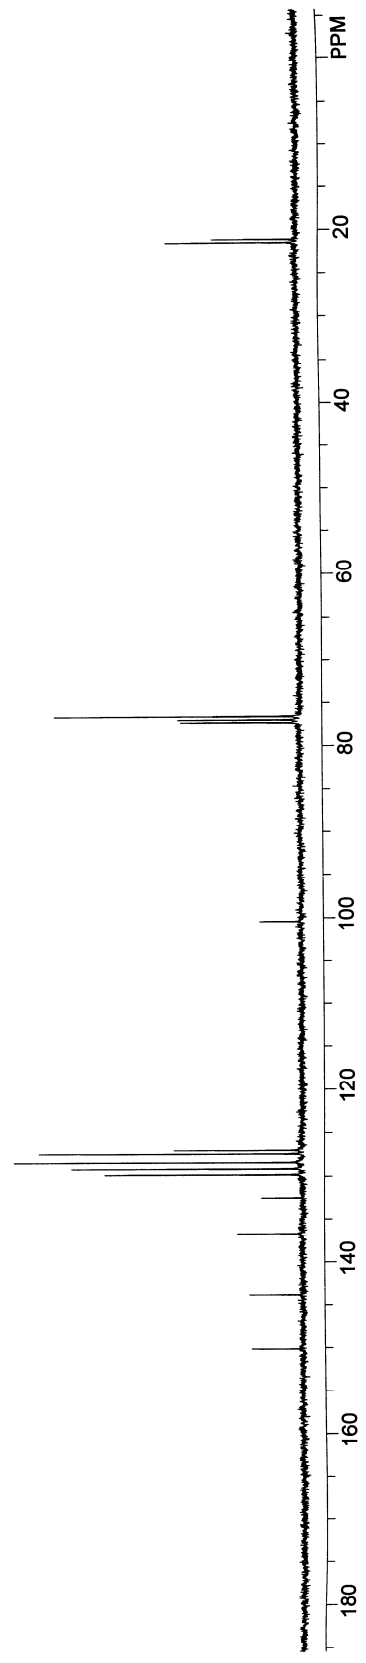

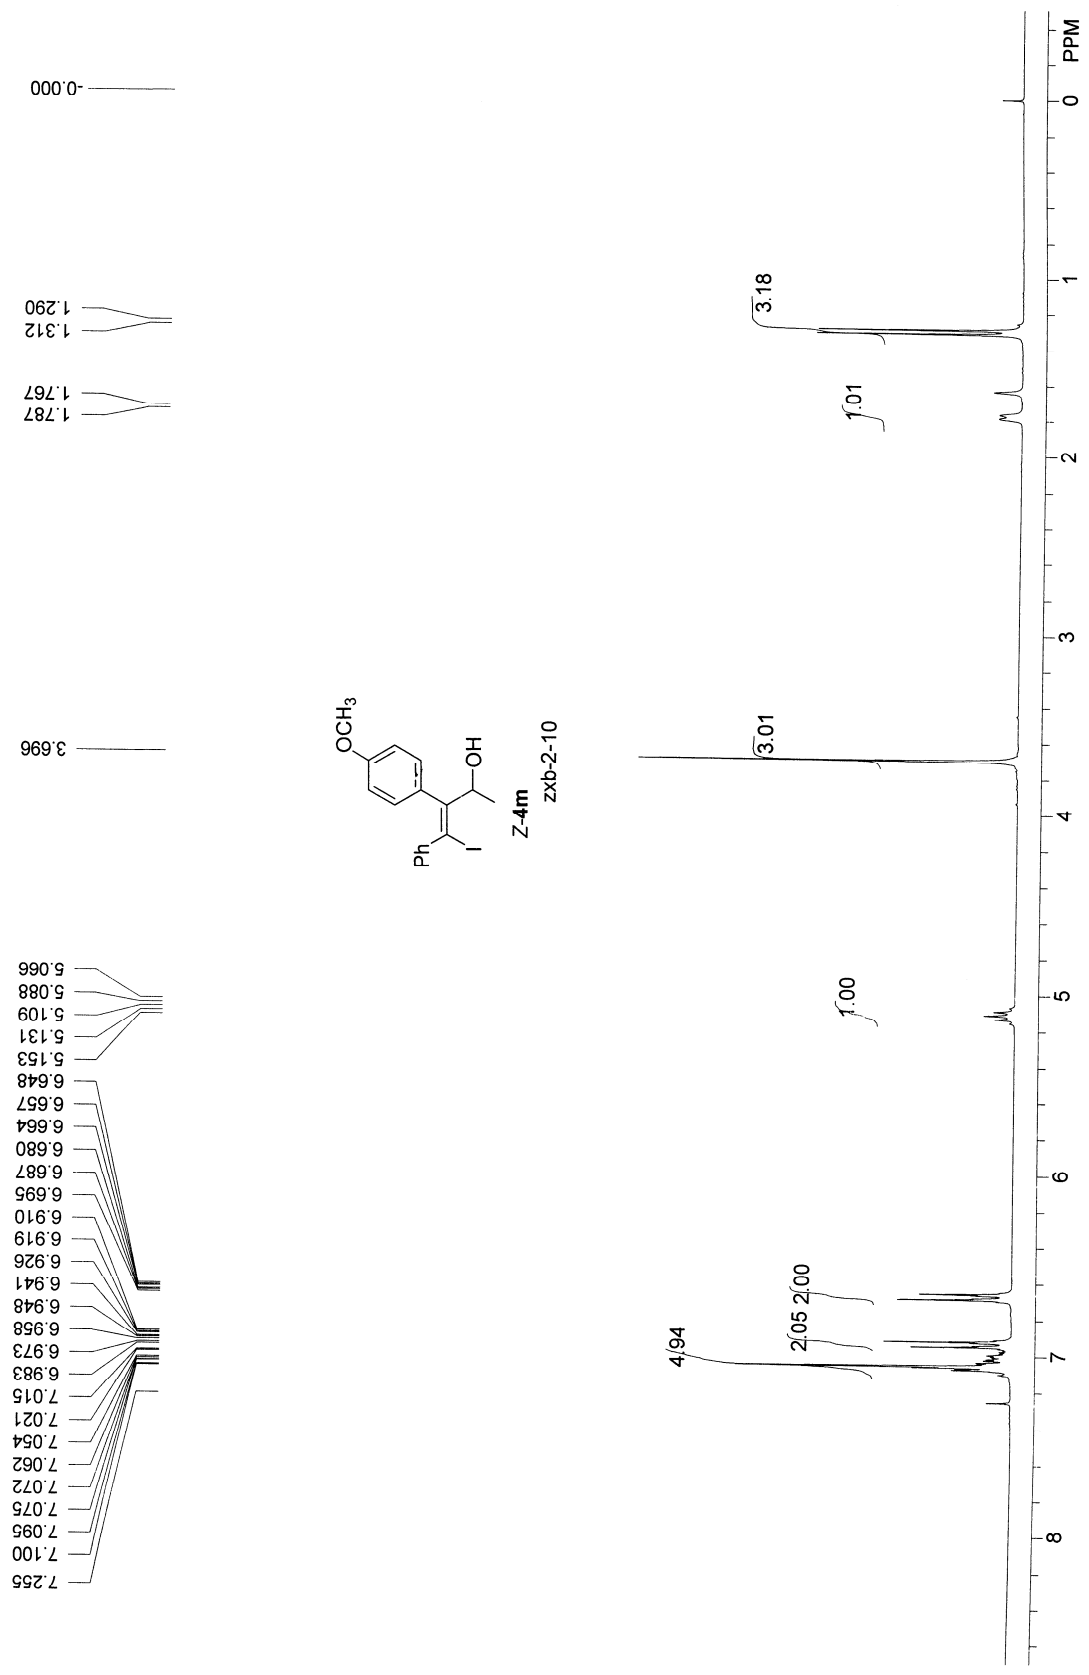

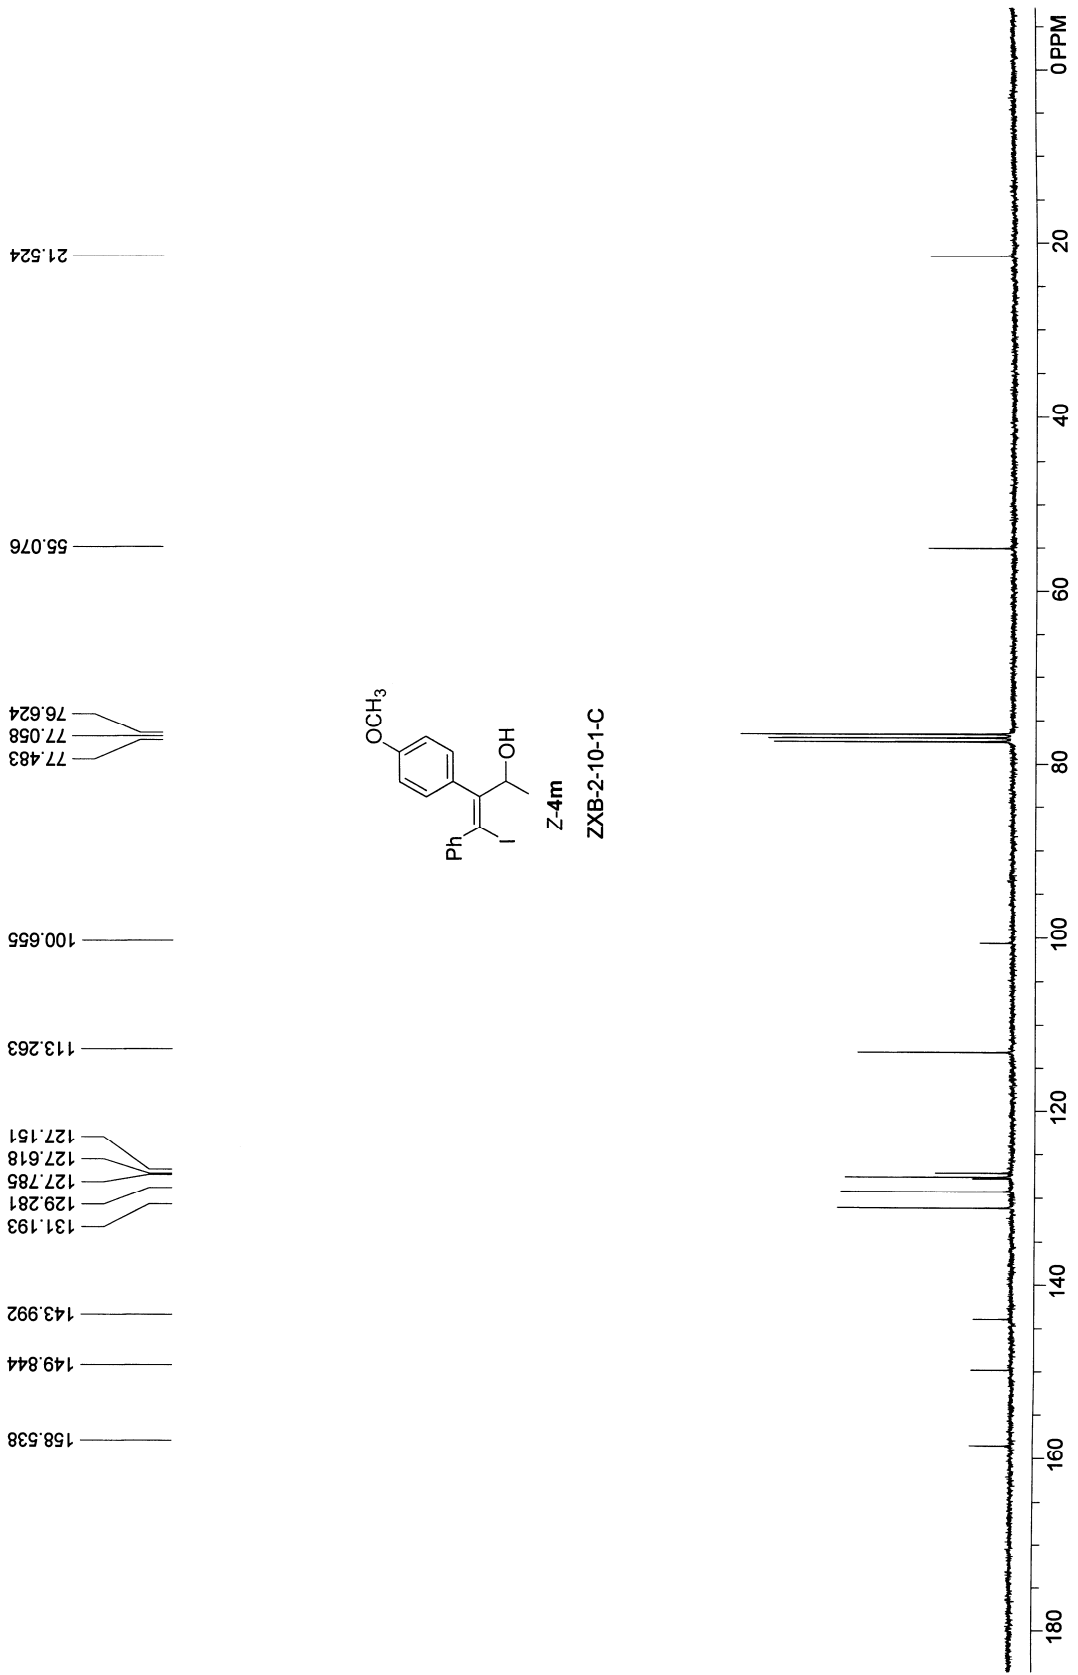



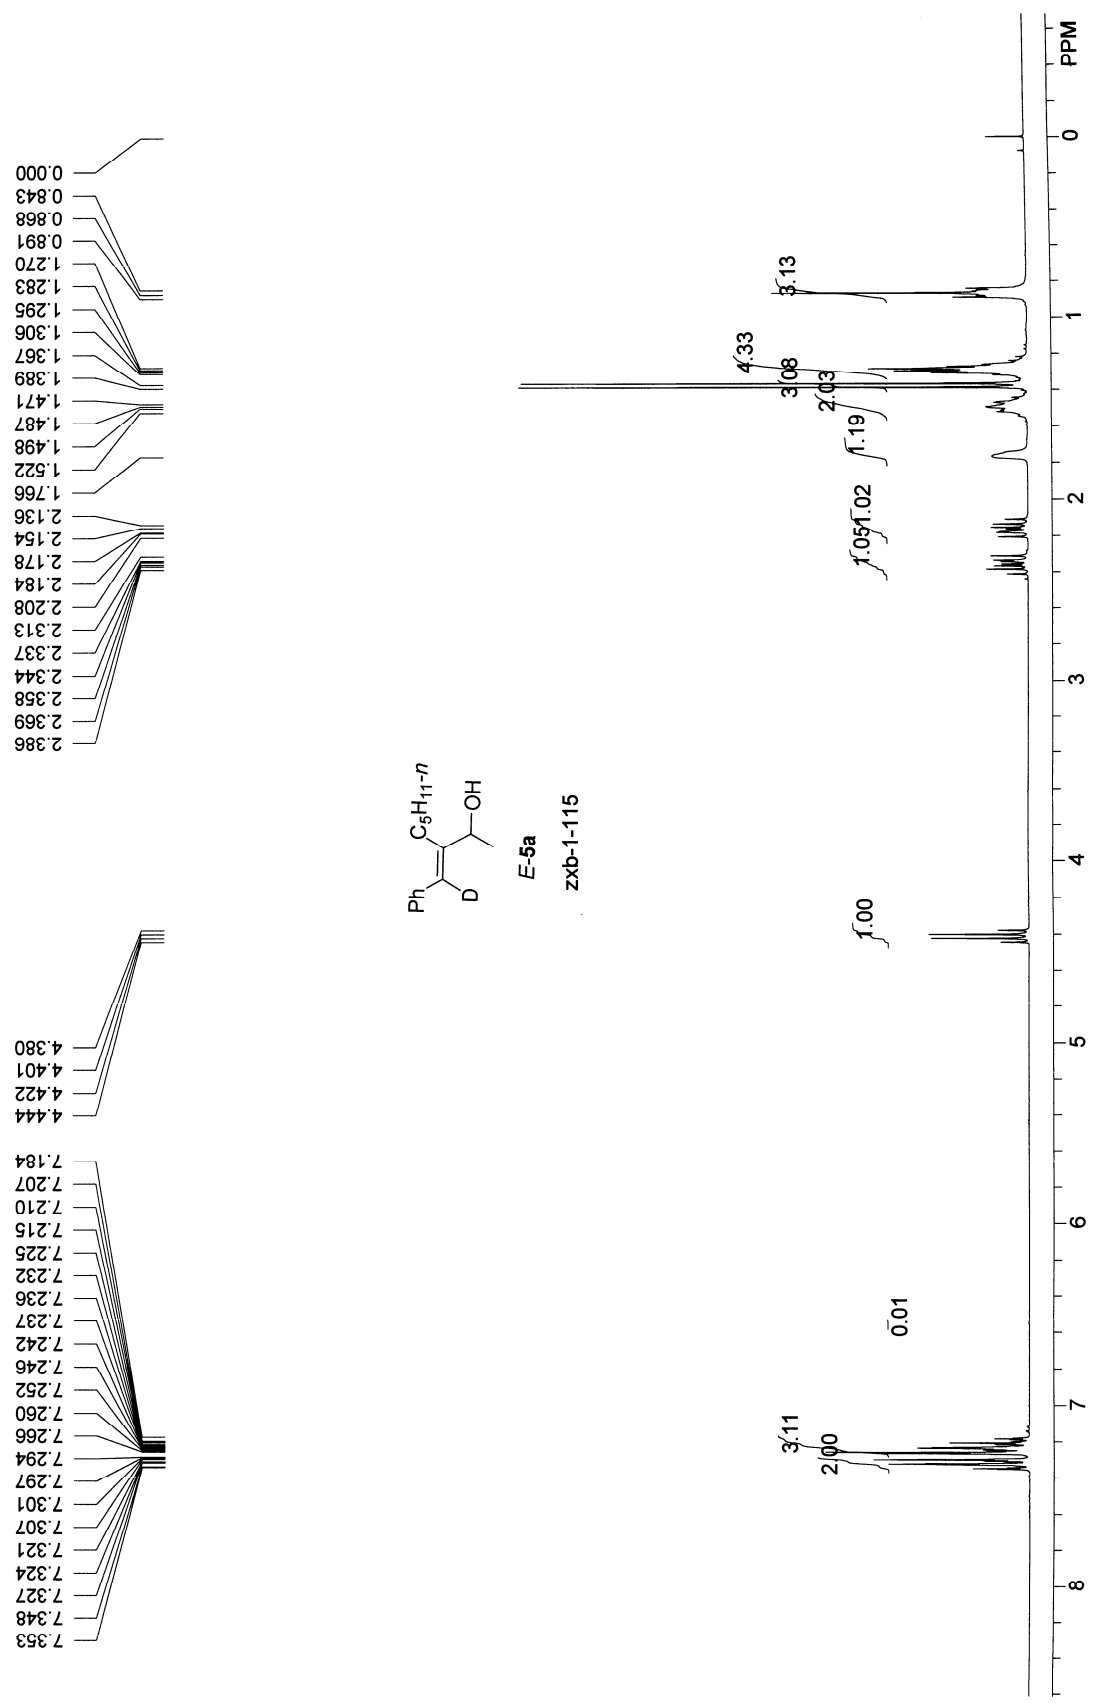

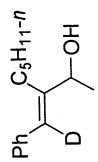

**E-5a**

zxb-1-115-c

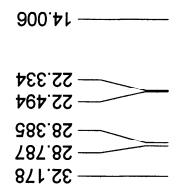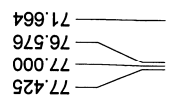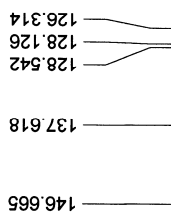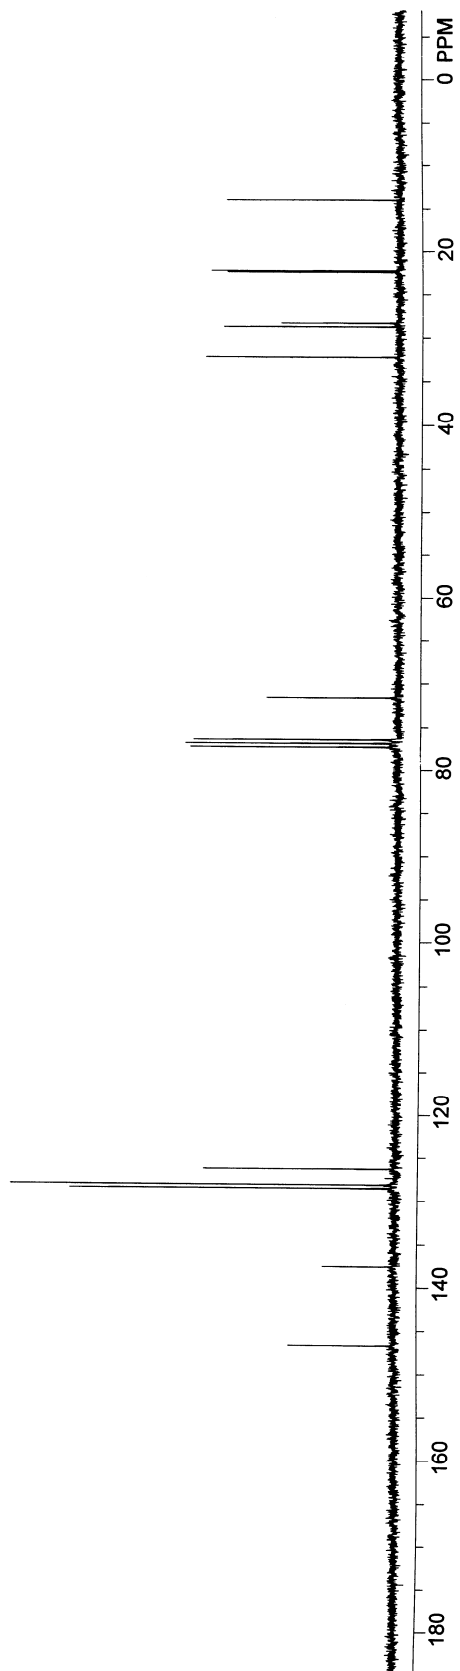

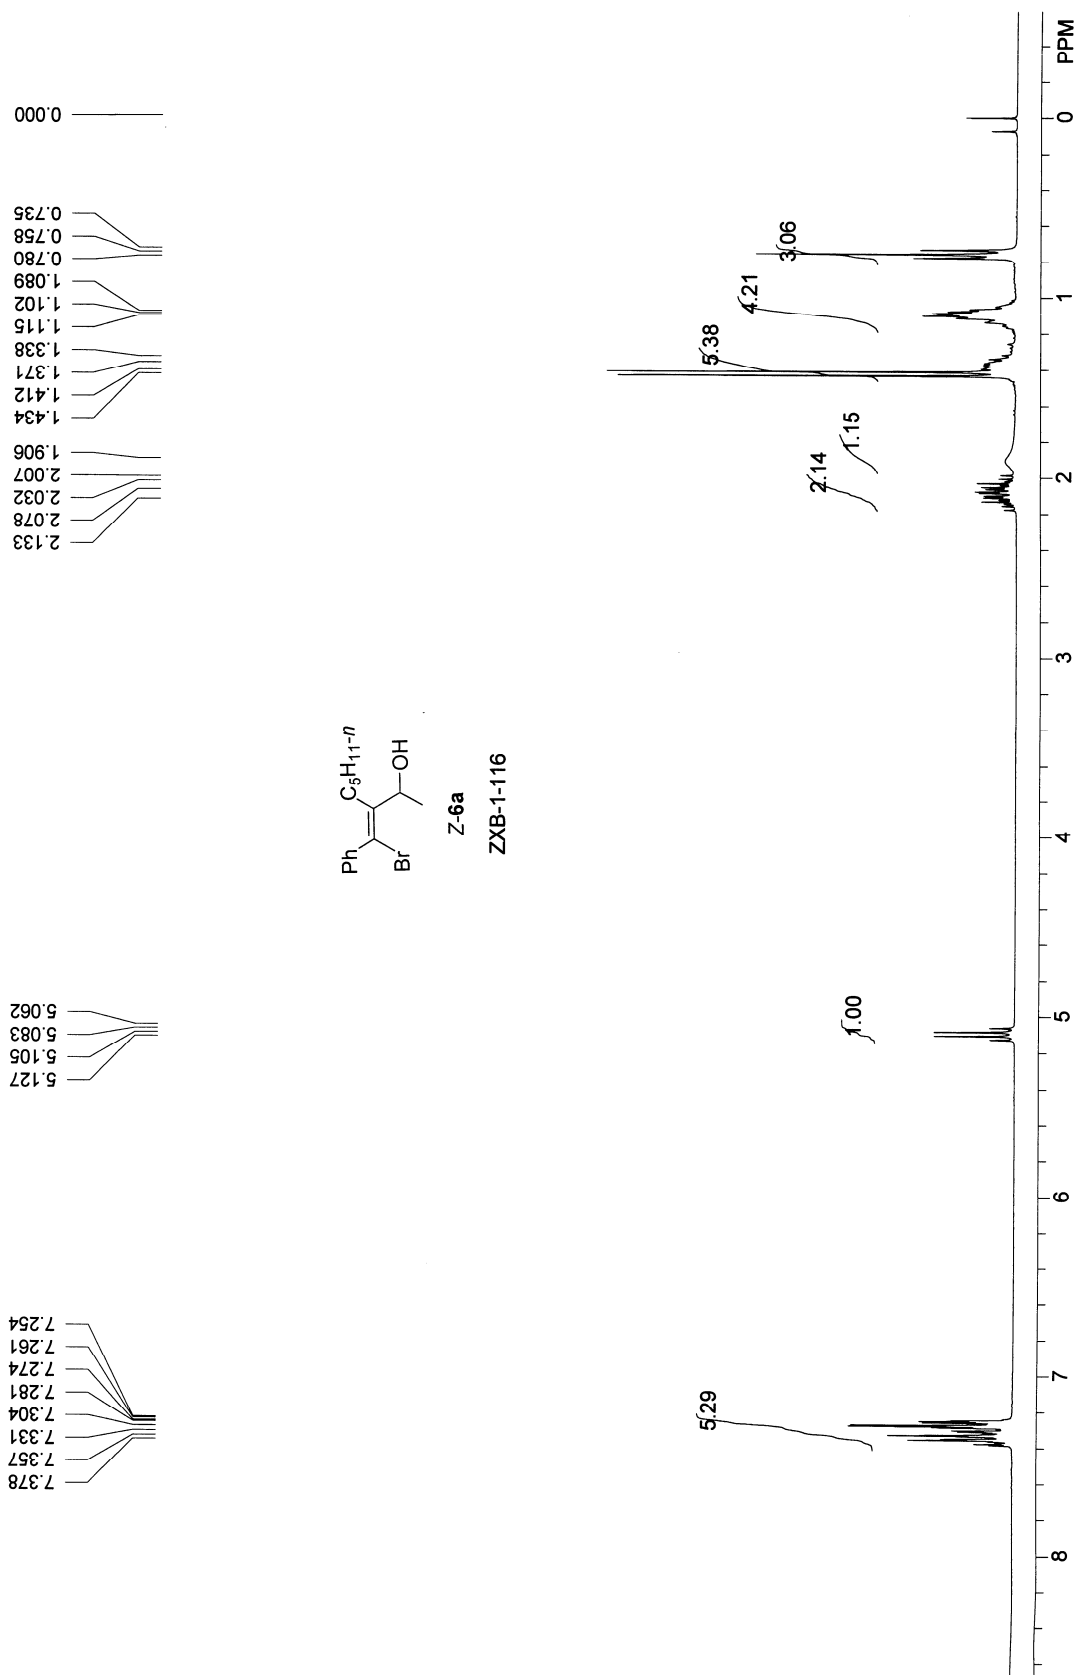

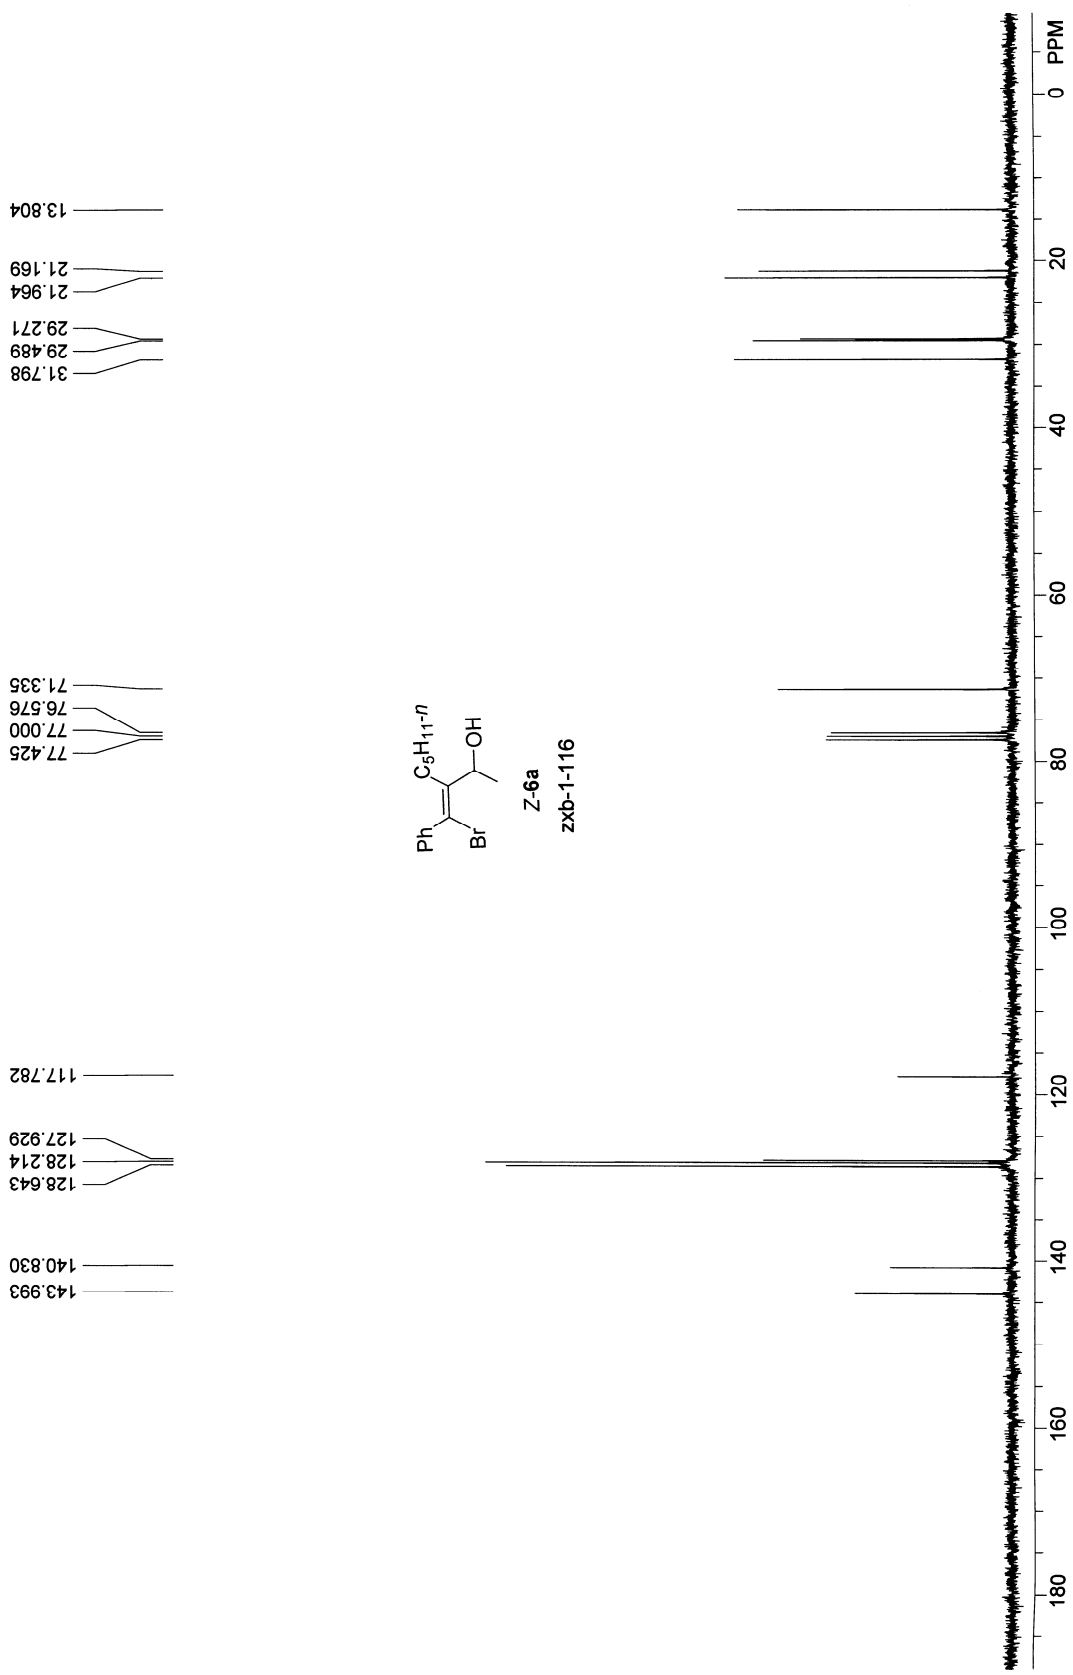

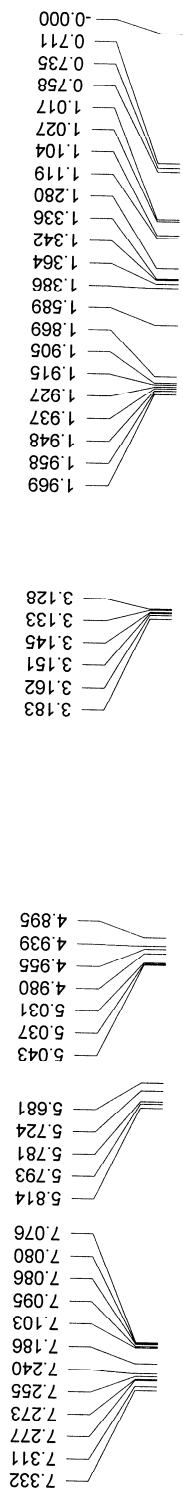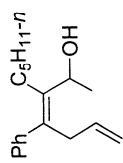

**E-7a**

zxb-1-107

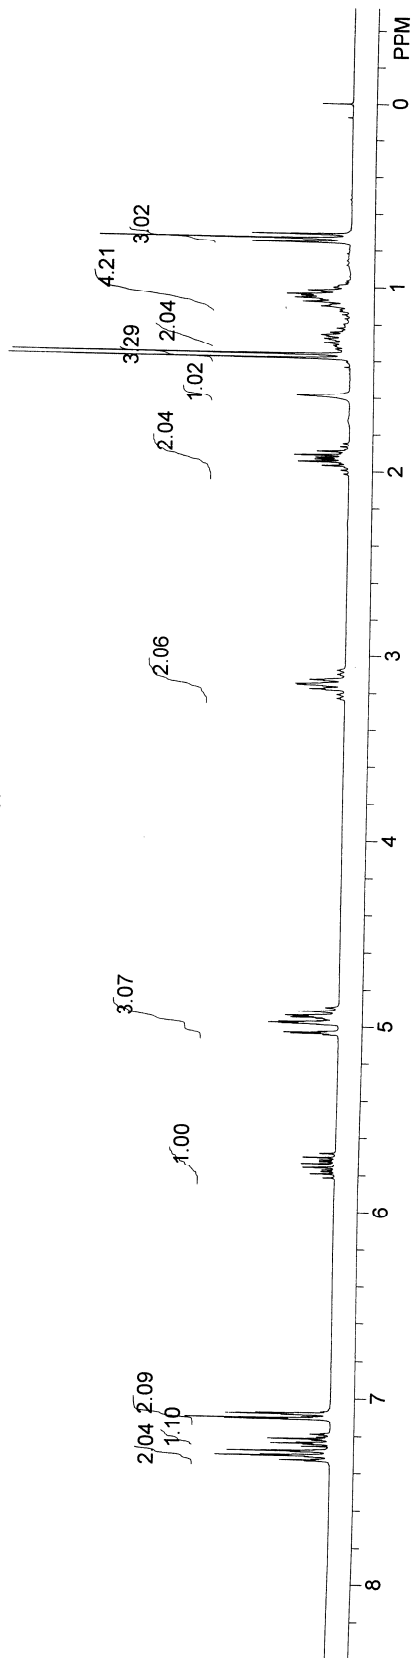

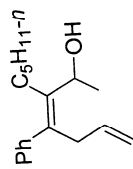

*E*-7a

zxb-1-107-c

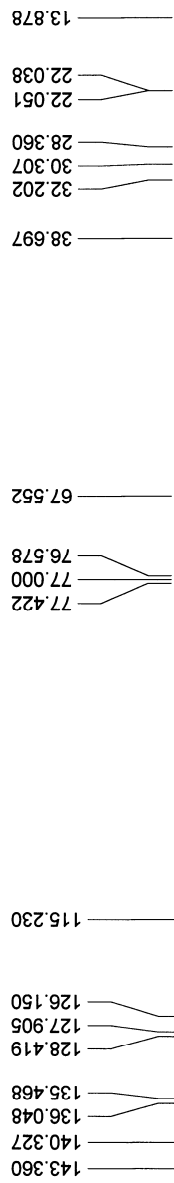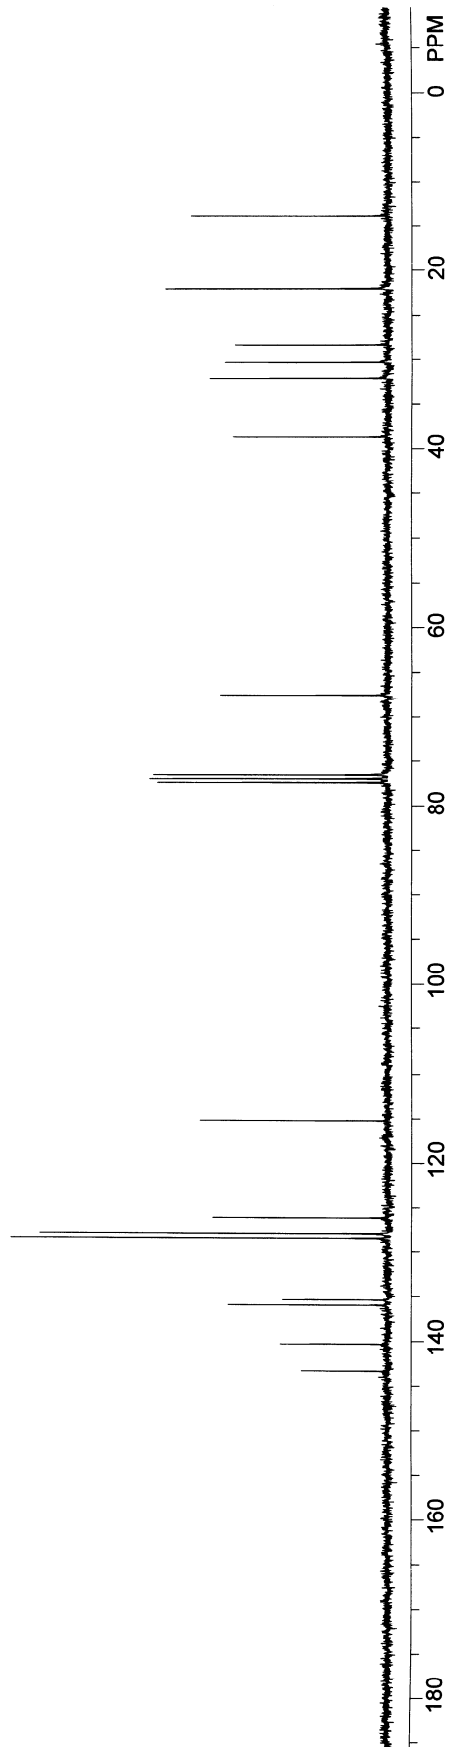

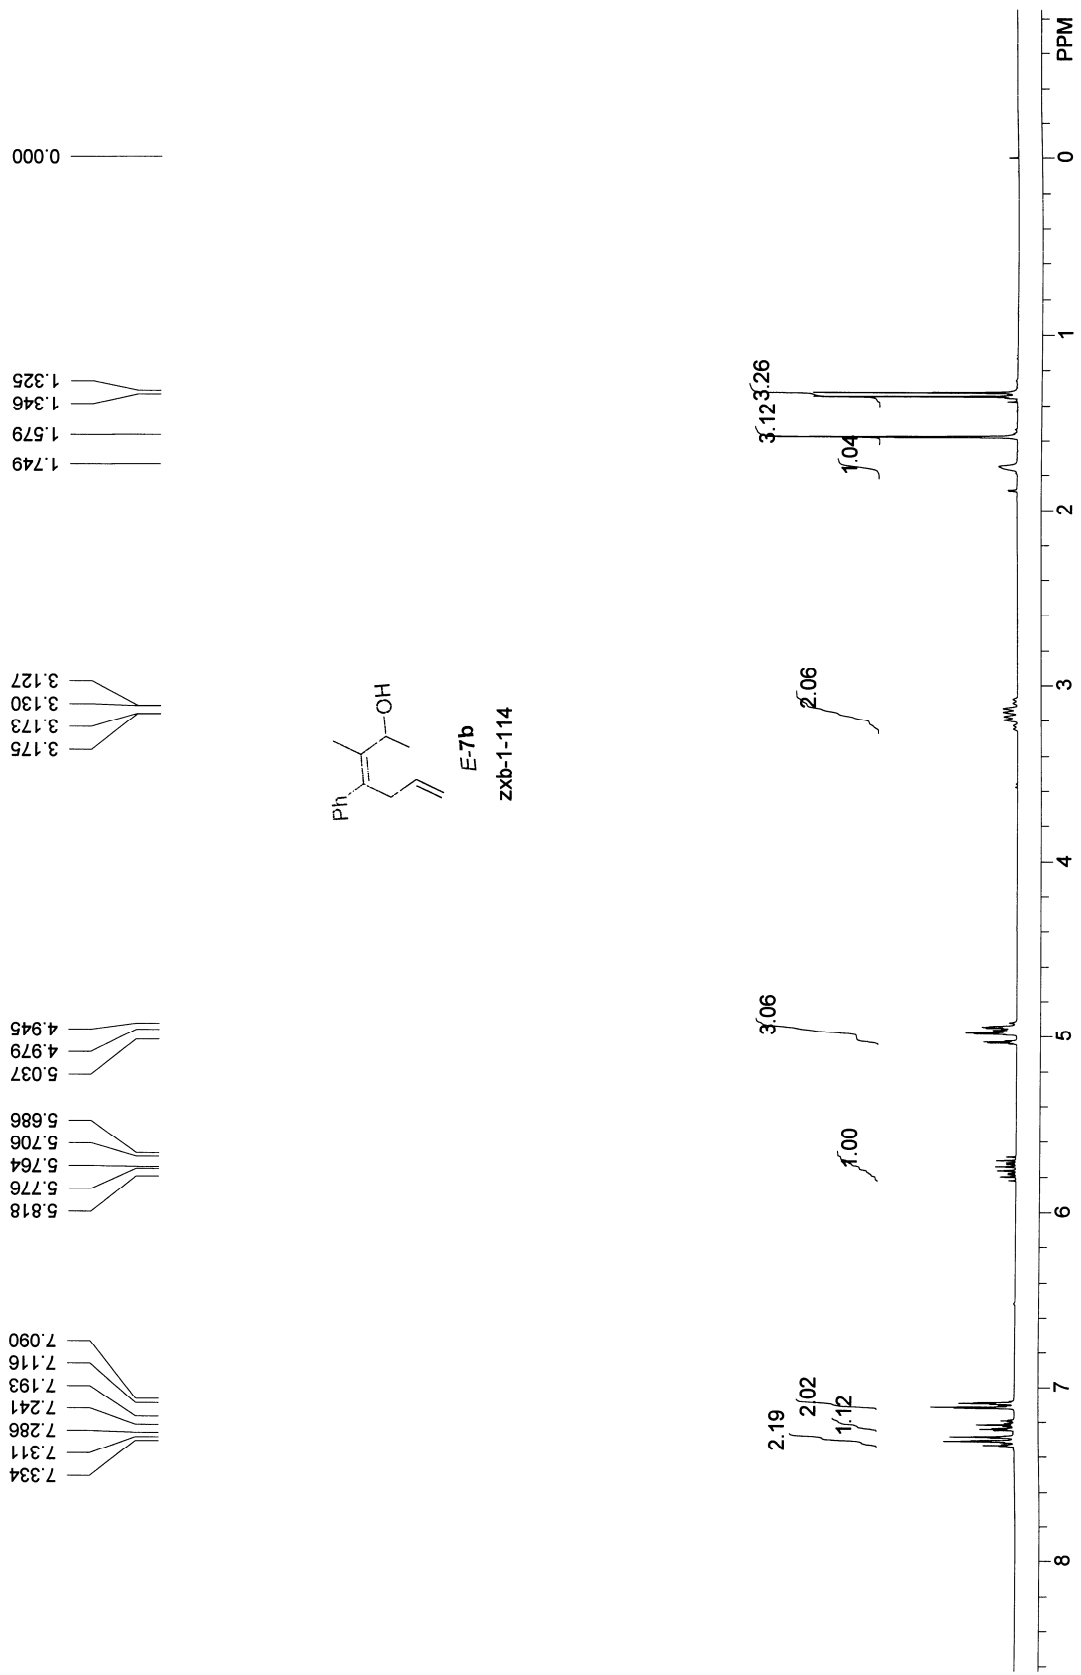

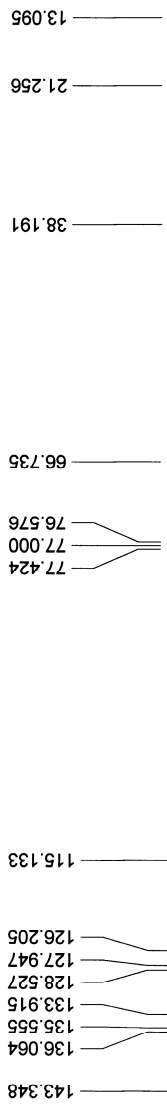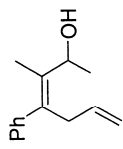

*E*-7b

zxb-1-114-c

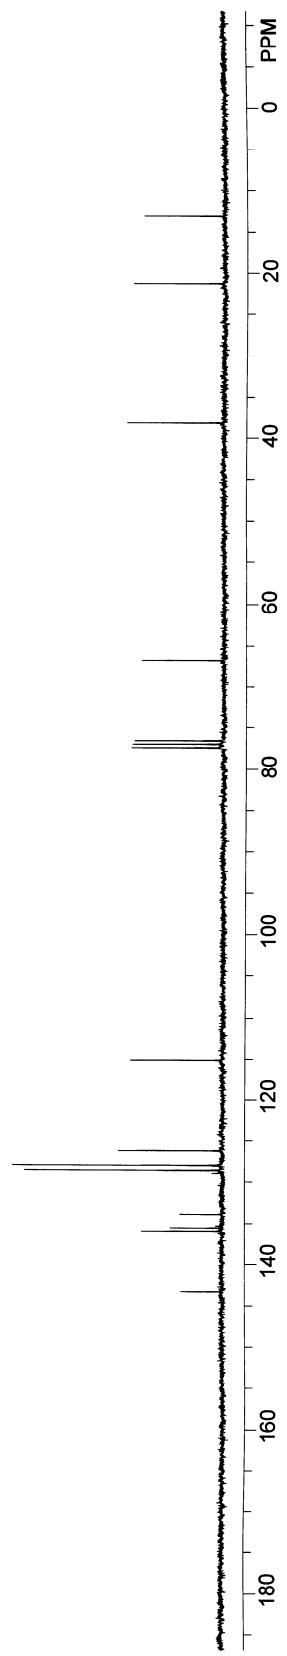



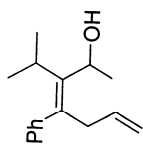

E-7c

zxb-2-112

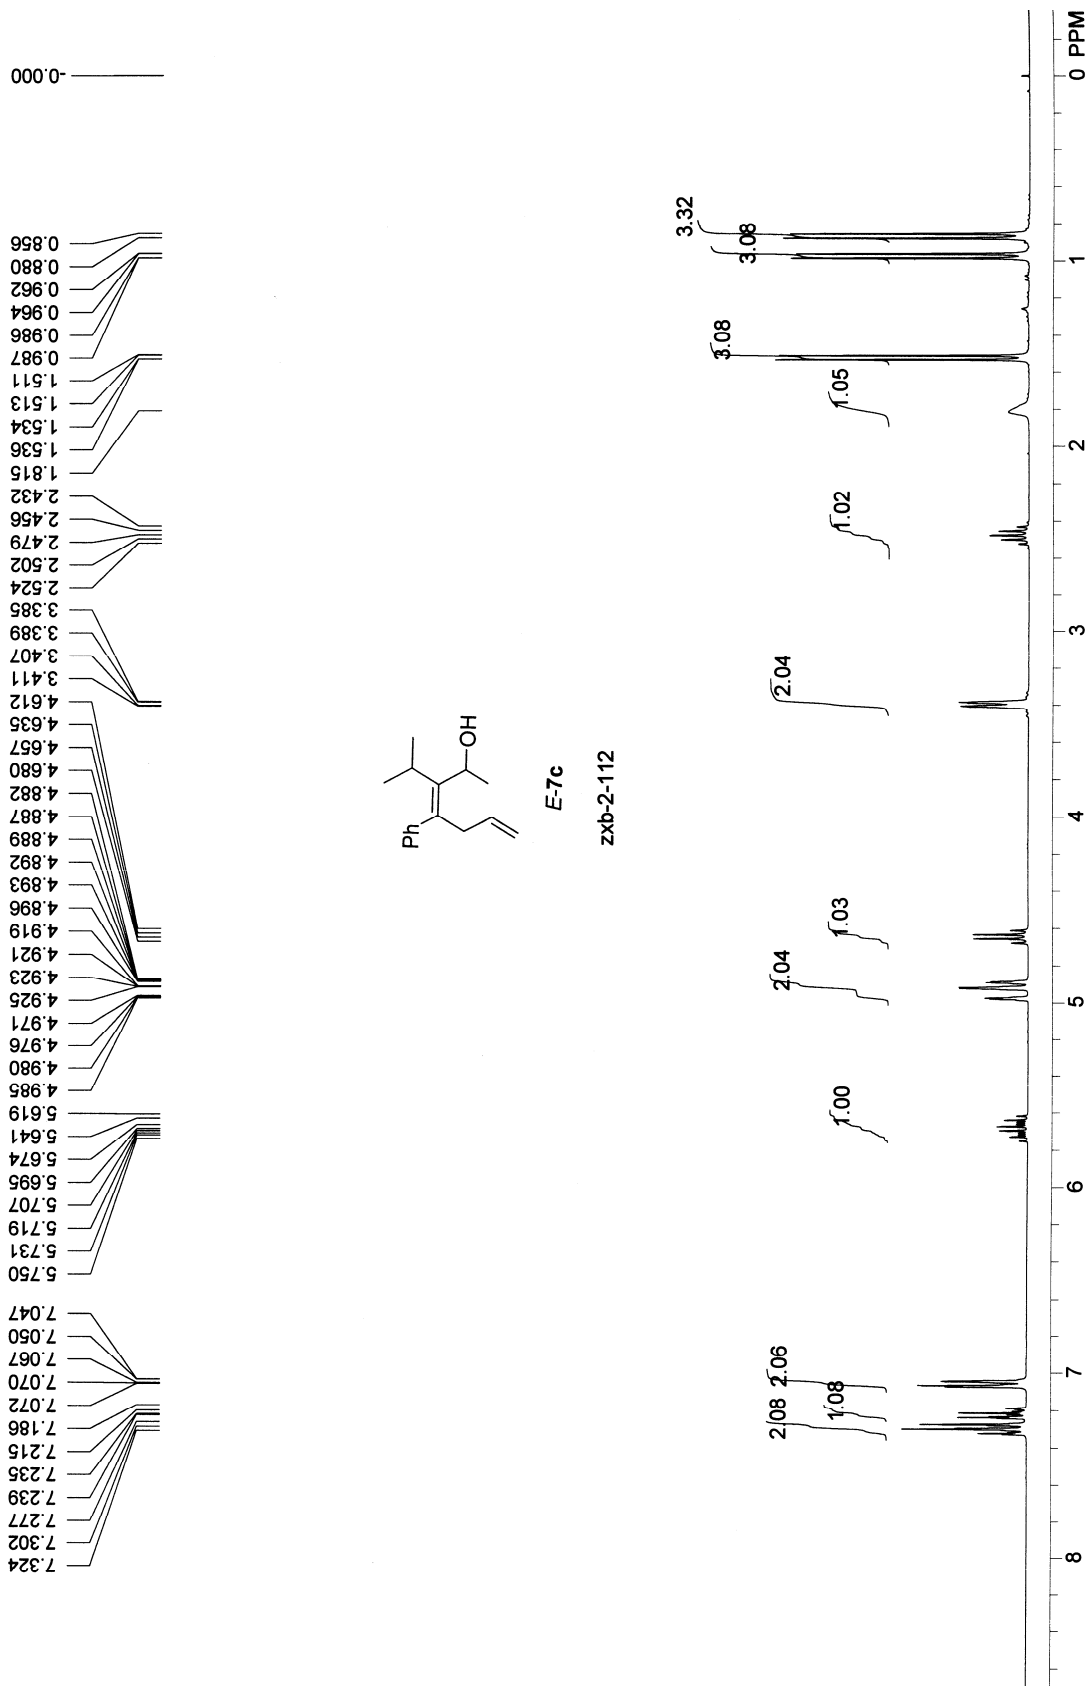

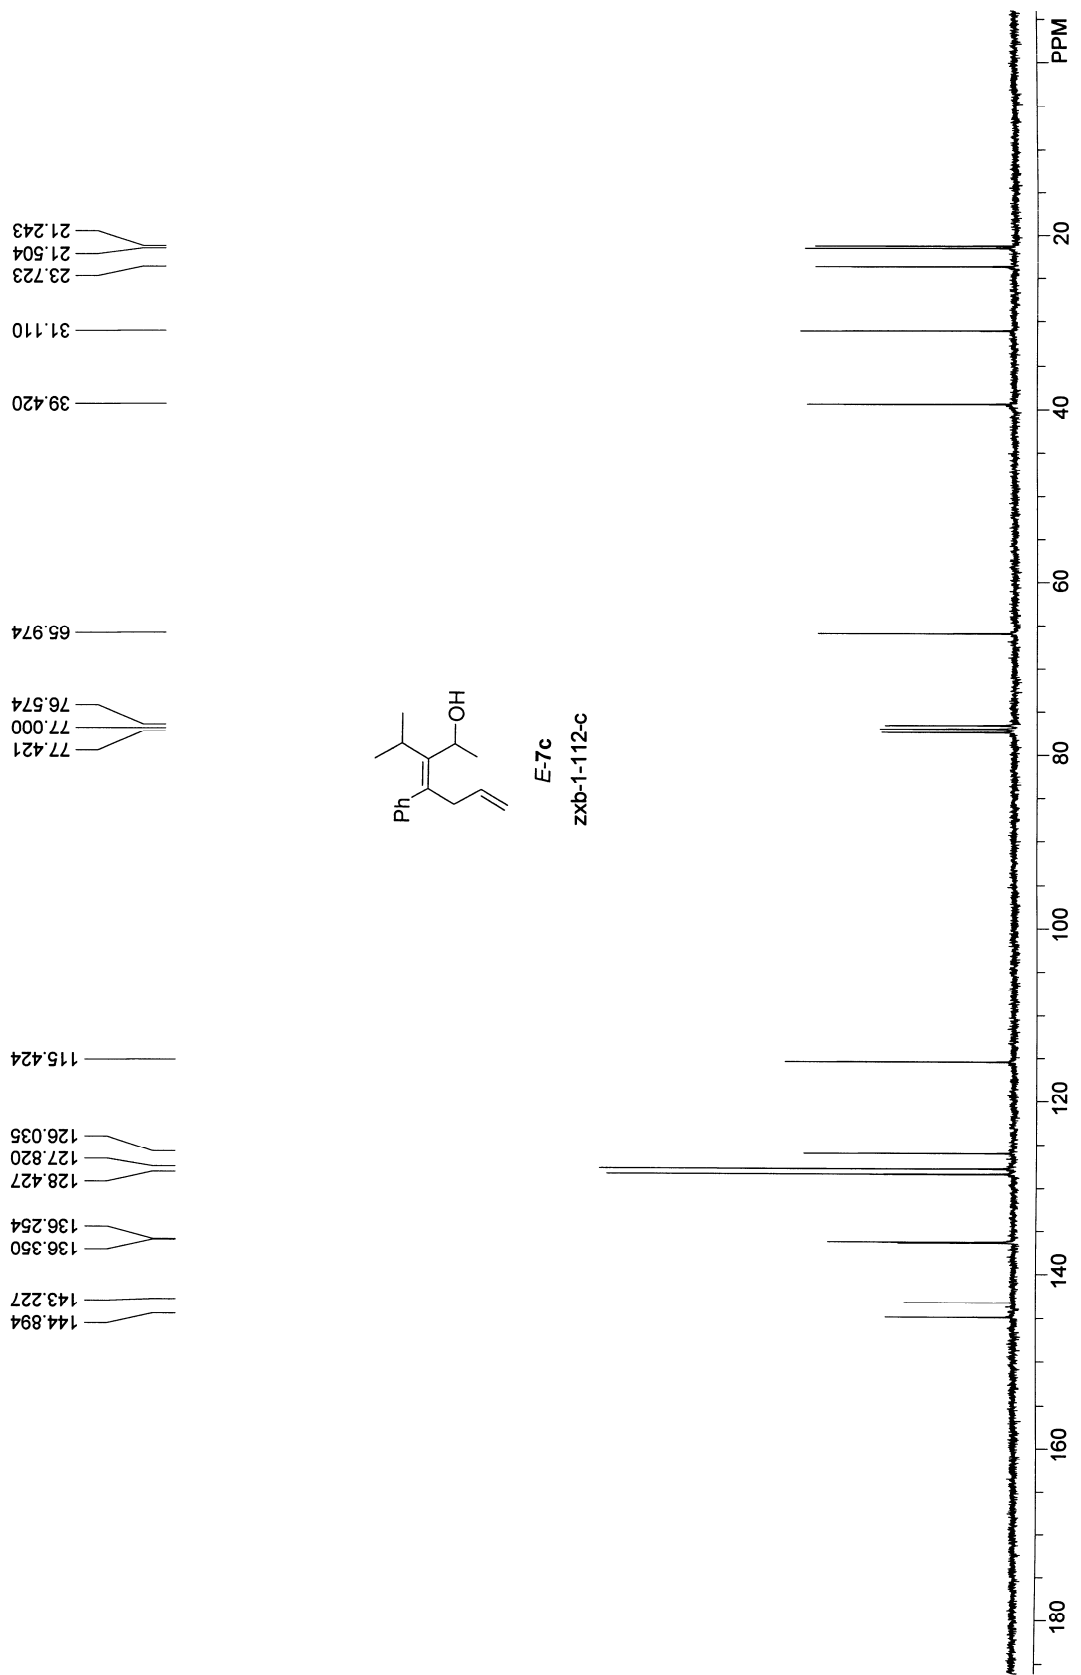

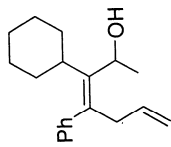

*E*-7d

zxx-2-109-2

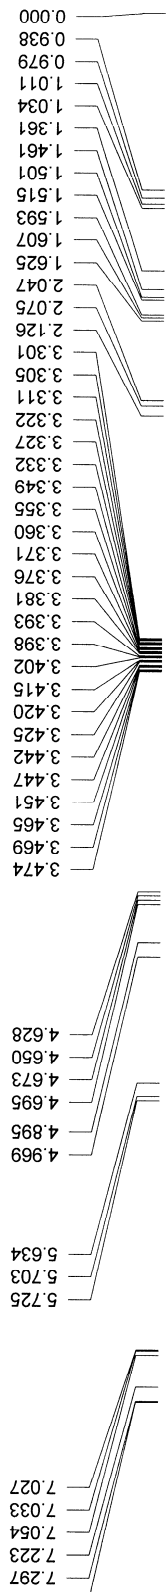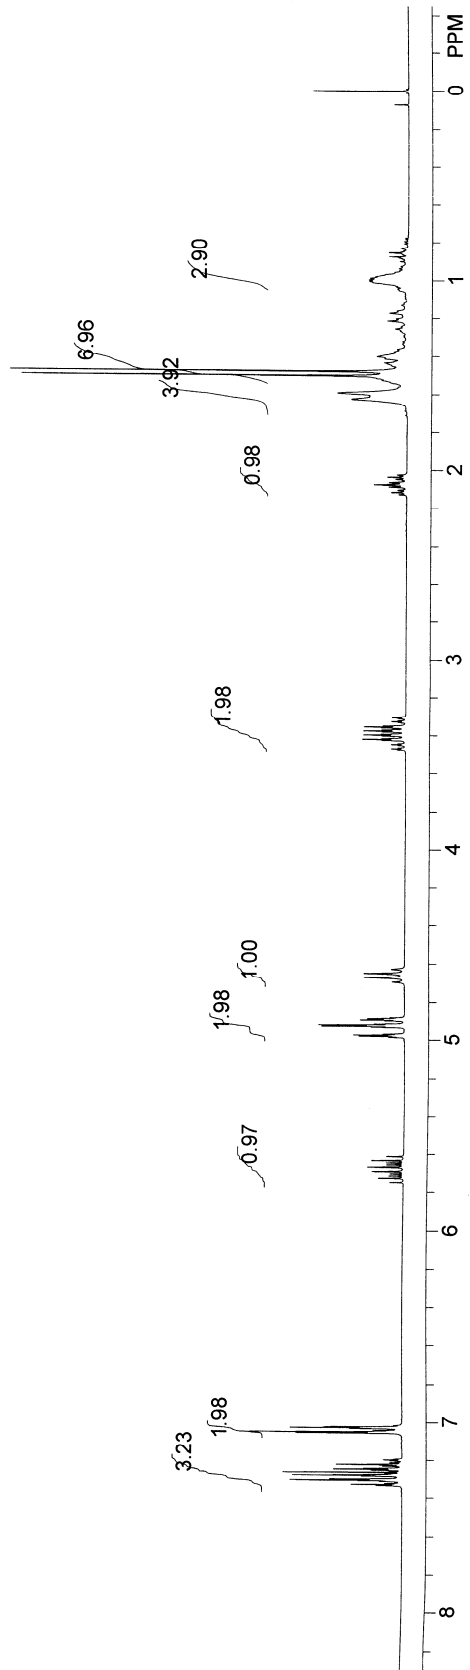

42.260  
39.479  
31.576  
31.355  
26.401  
26.254  
25.907  
23.473

66.974

77.421  
77.000  
76.578

115.389

128.436  
127.809  
126.092

136.411  
136.777

143.295  
144.842

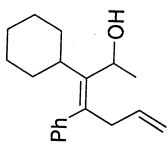

*E*-7d

zxb-1-109-2-c

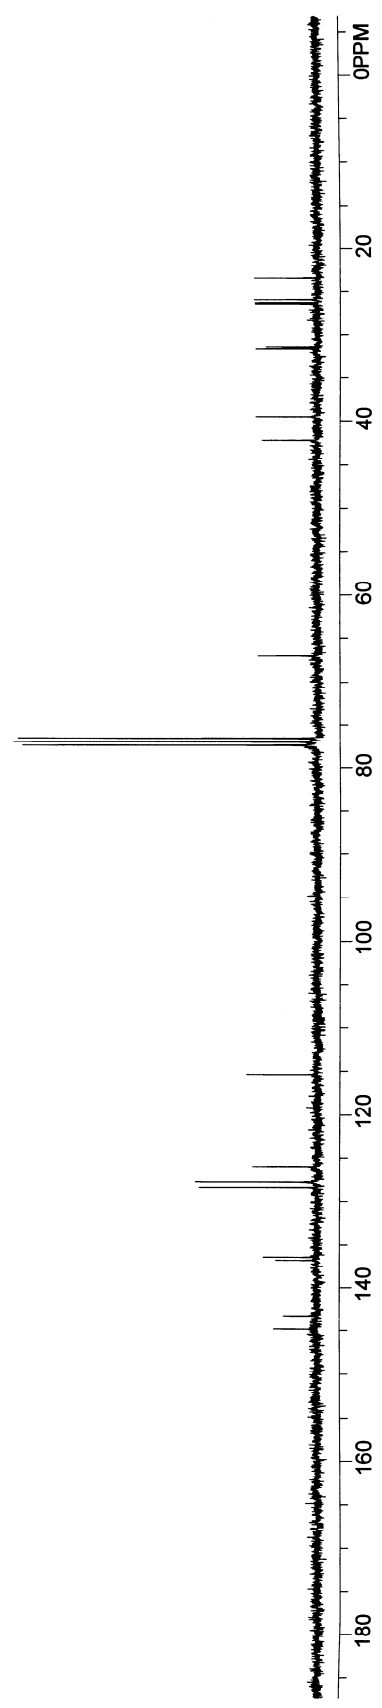

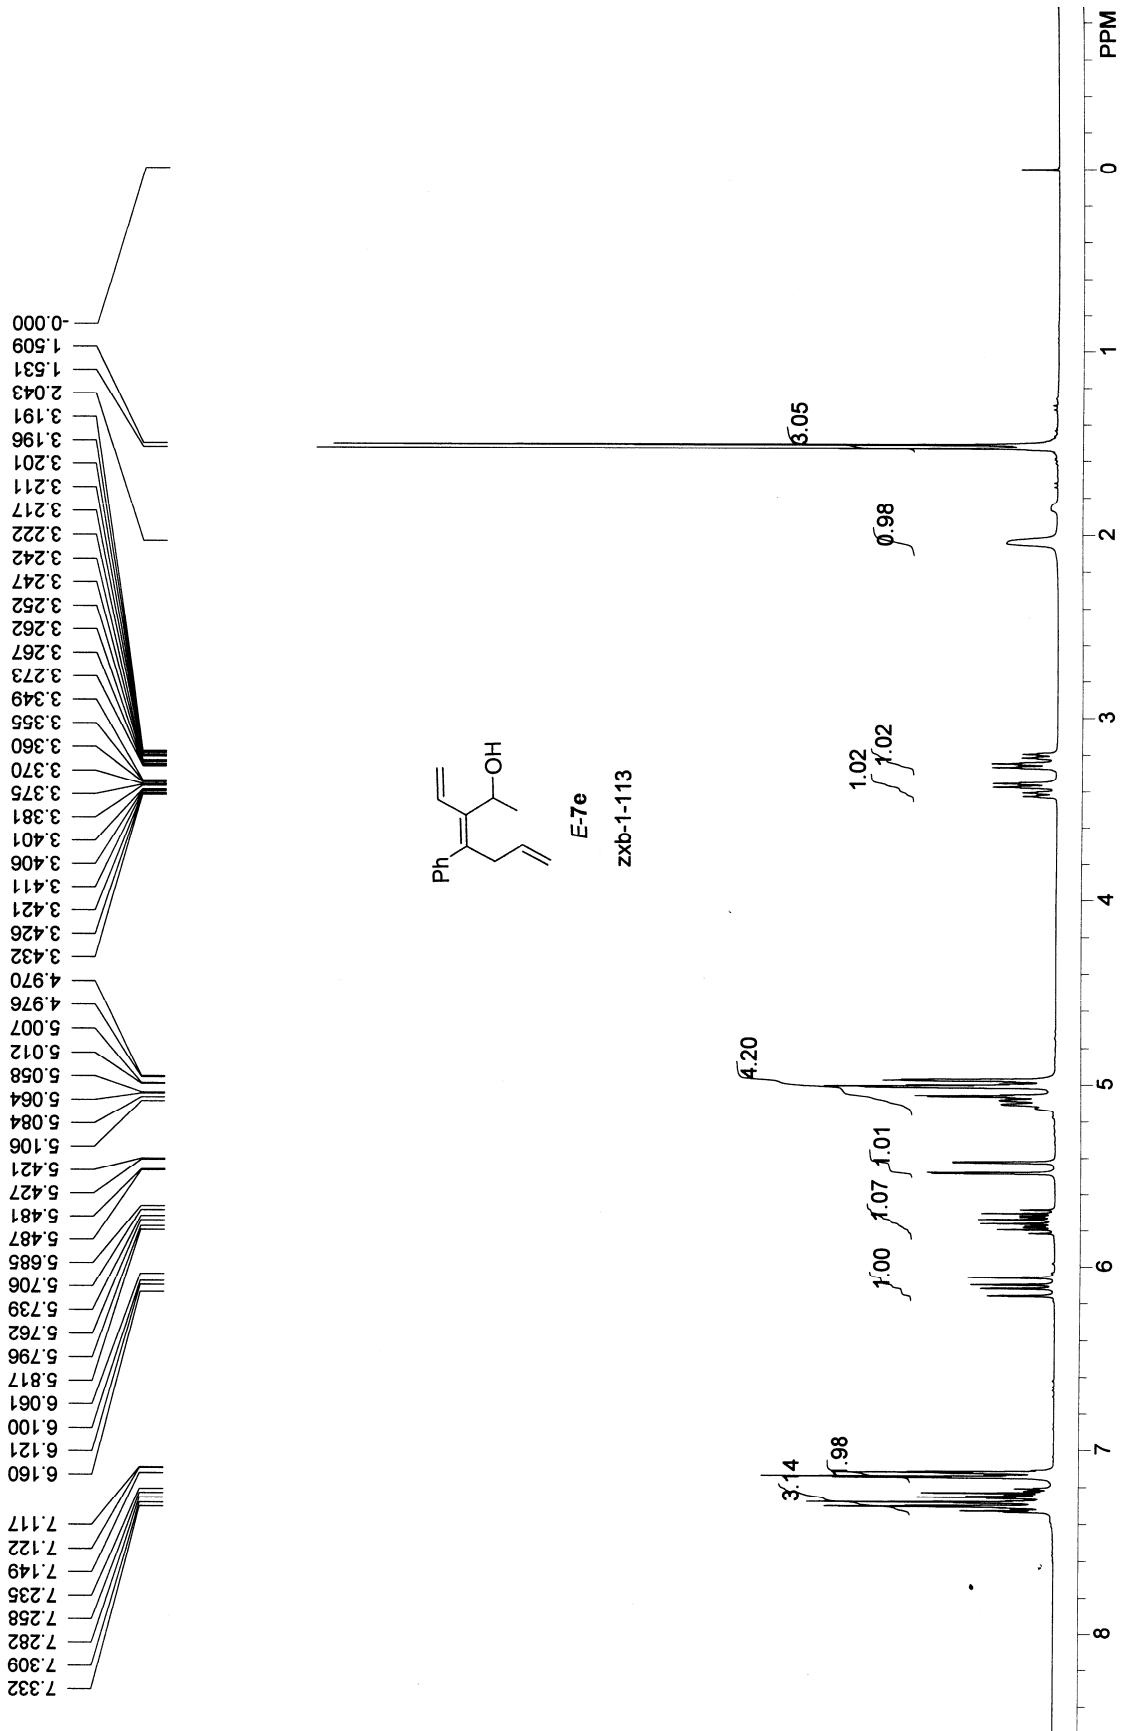

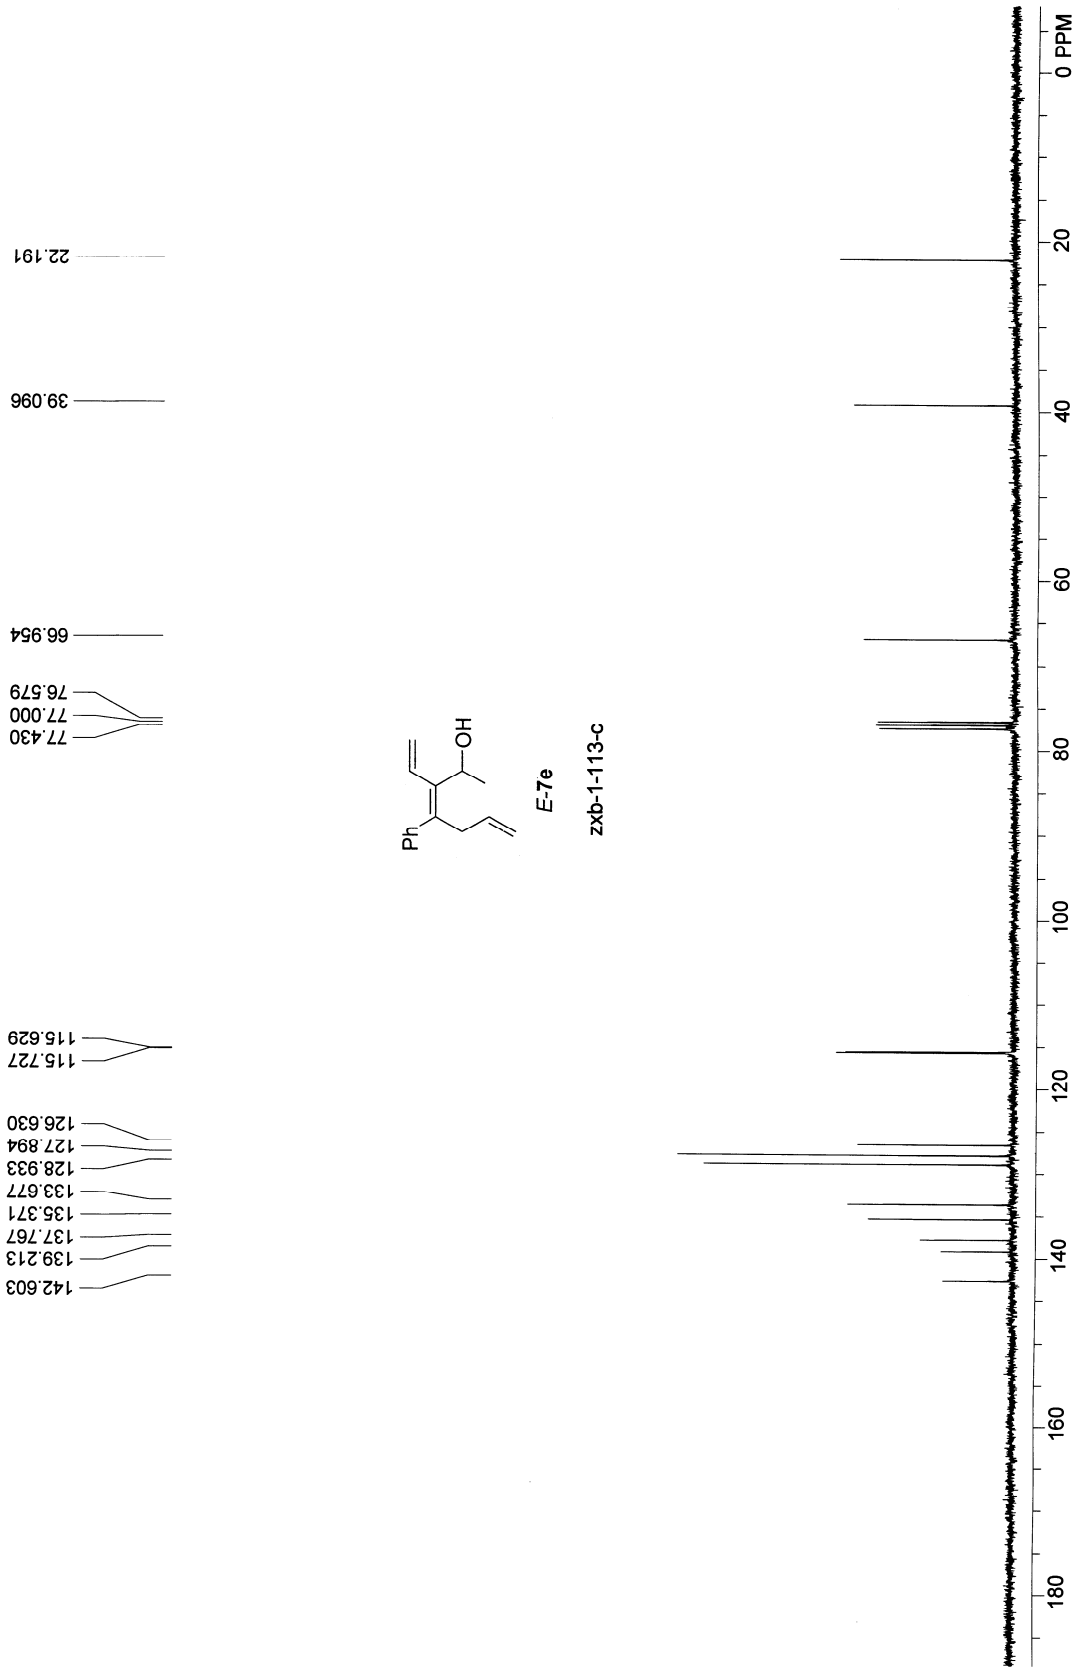

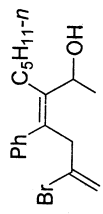

E-7f  
zxb-1-155

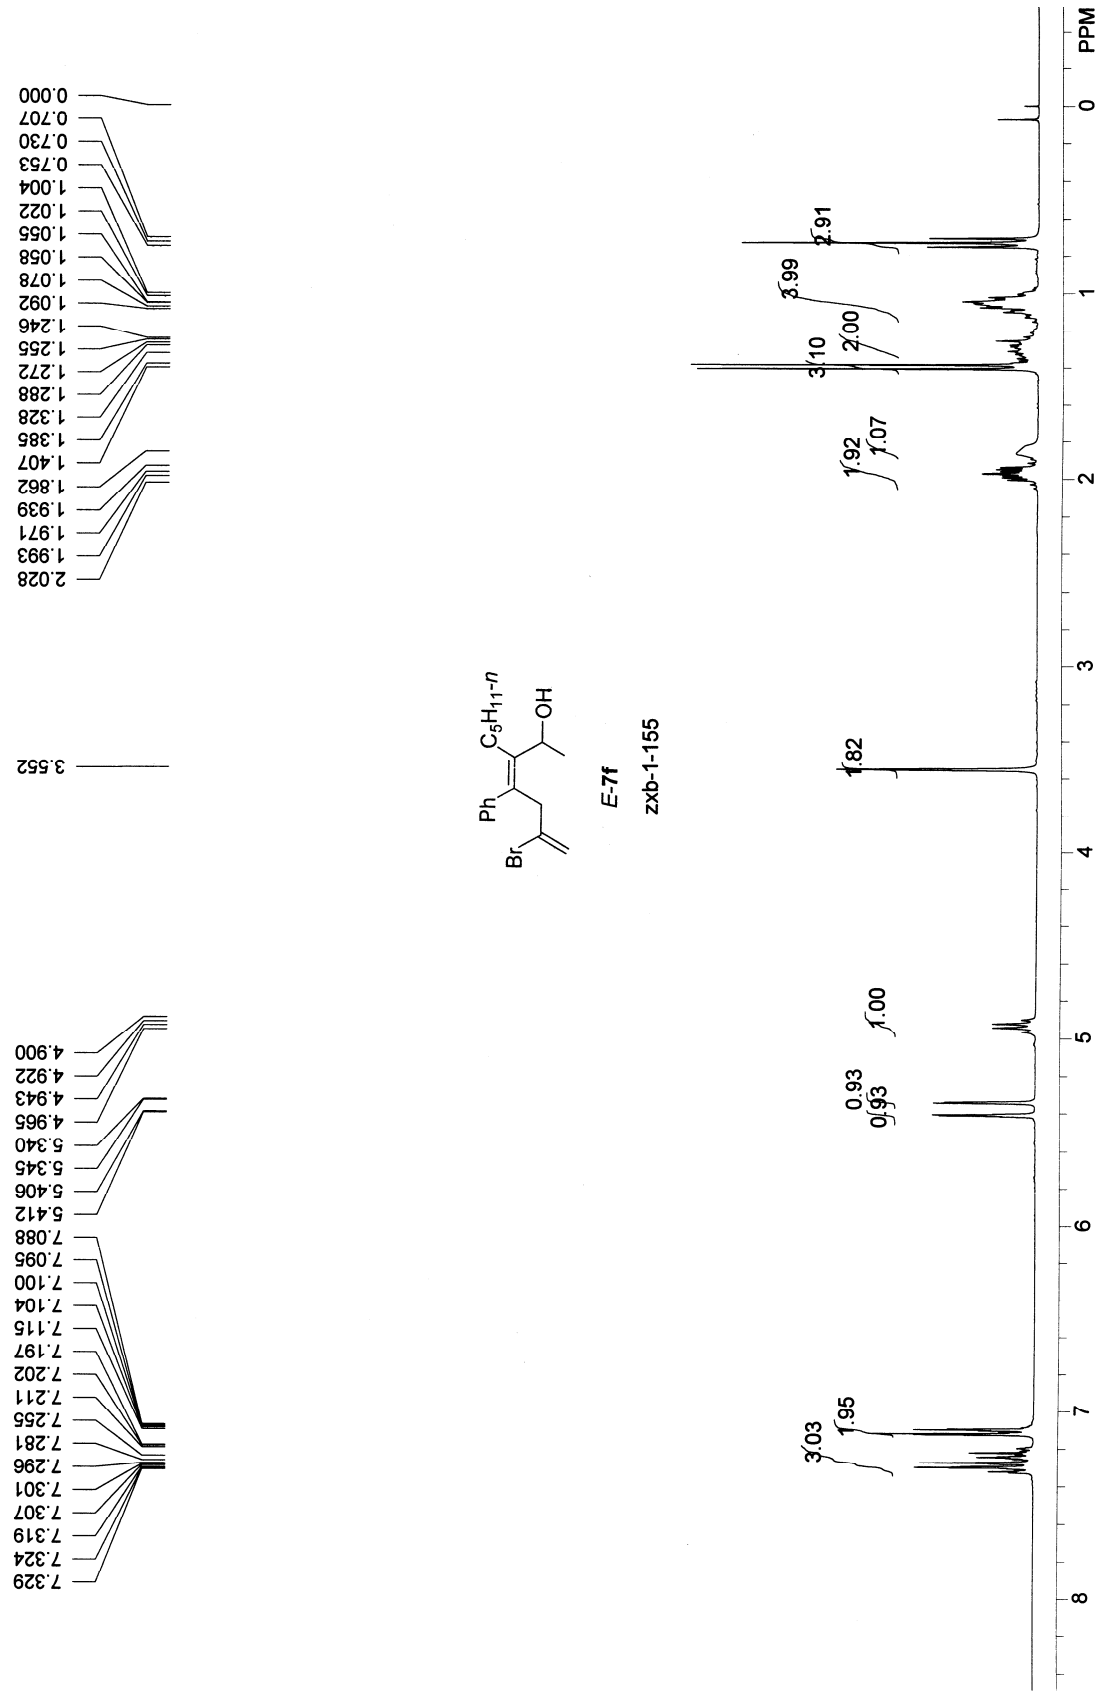

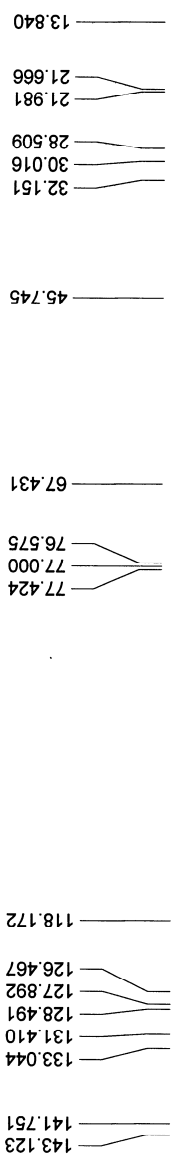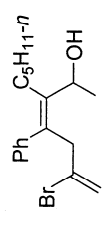

*E*-7f  
zxb-1-155-1-c

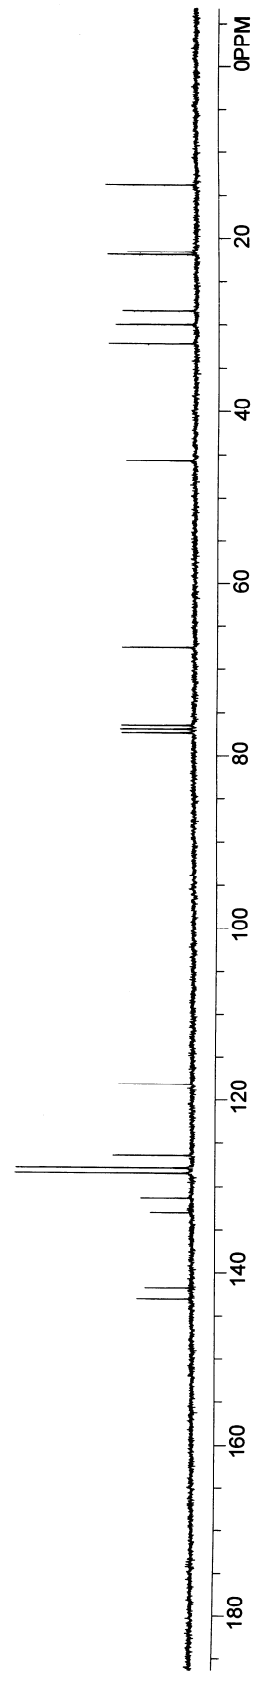



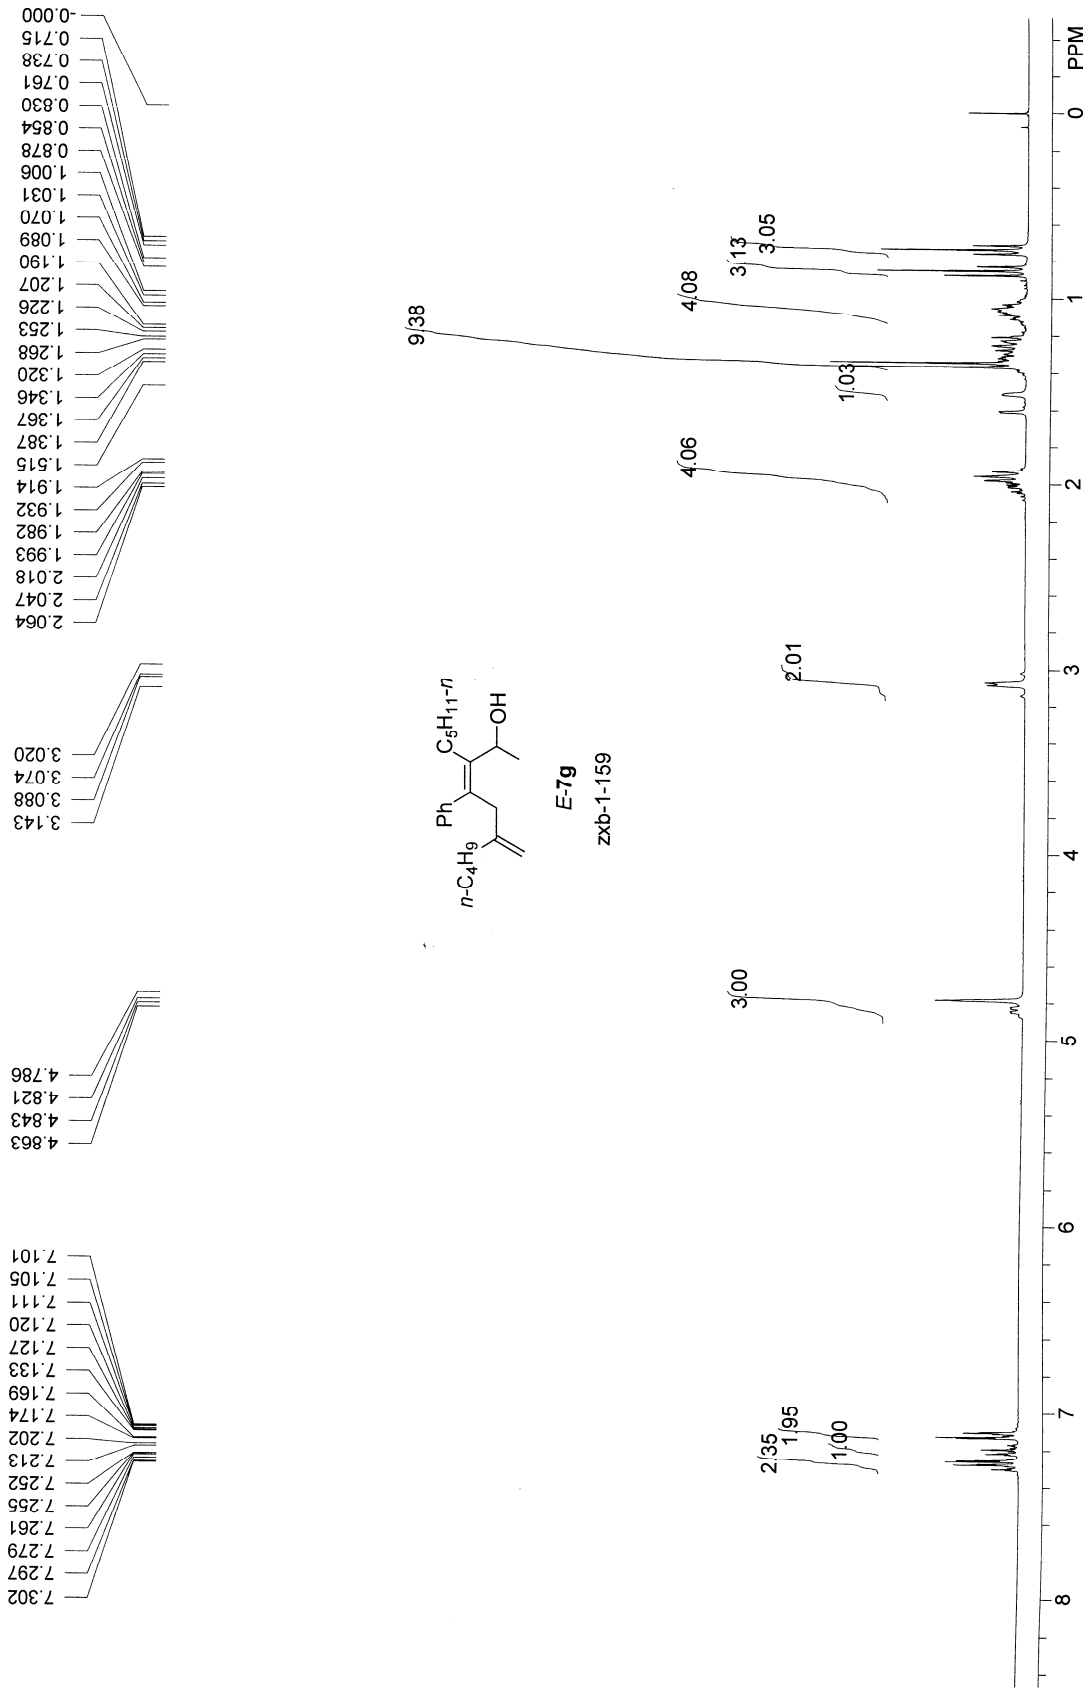

40.870  
36.490  
32.276  
30.373  
29.806  
28.058  
22.375  
22.059  
21.650  
13.933  
13.879

67.766  
77.424  
77.000  
76.576

109.925

126.053  
128.356  
127.770

135.190  
141.103  
143.849  
147.879

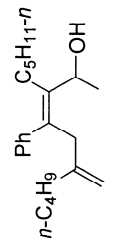

*E*-7g  
ZXB-1-159-C

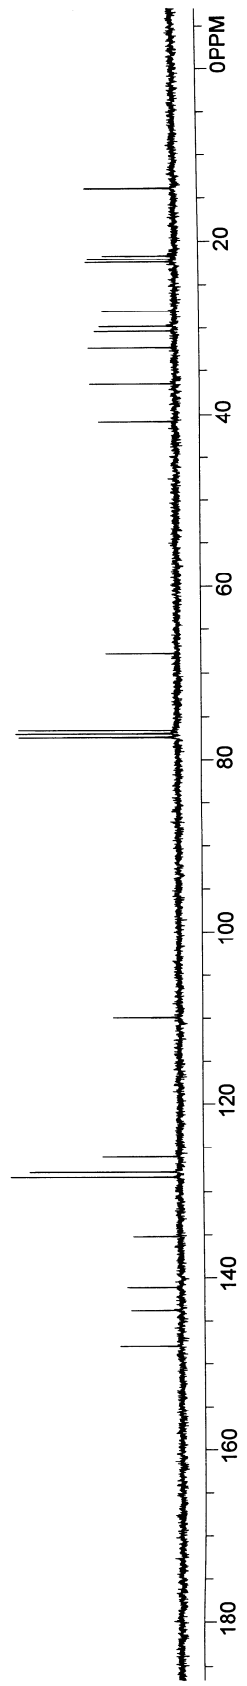

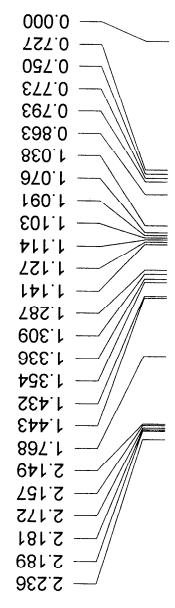

**8a**  
zxb-1-117-1

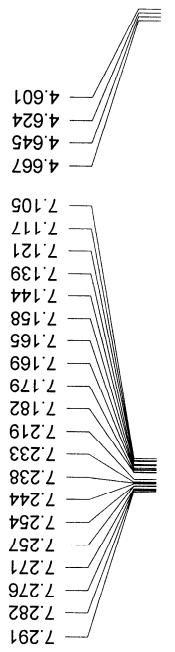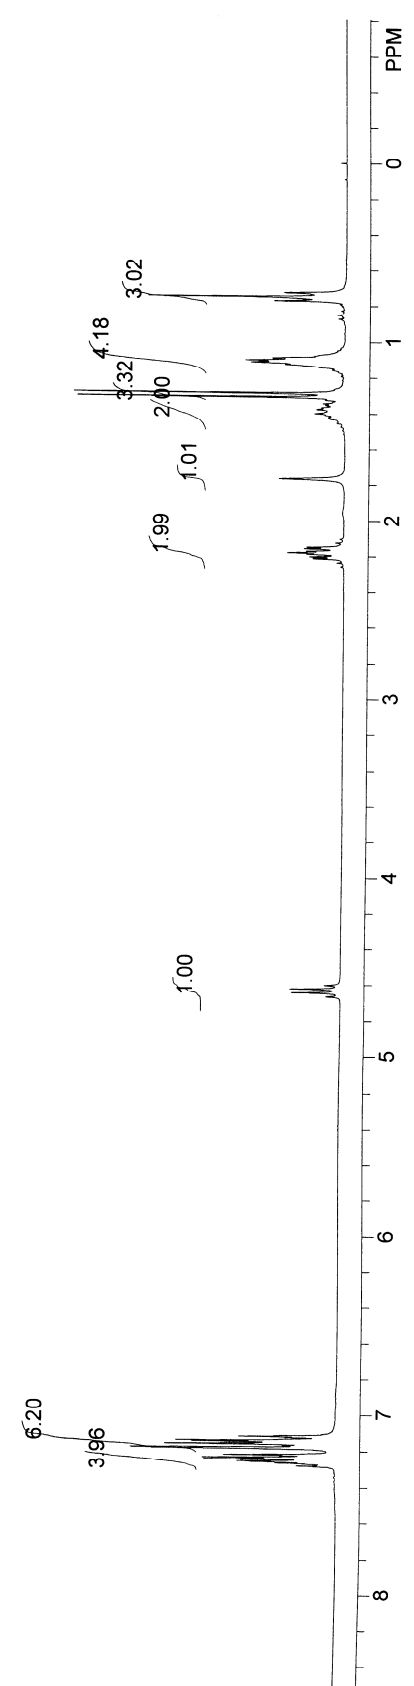

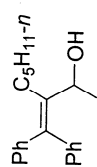

**8a**

zxb-1-117-1-c

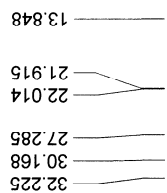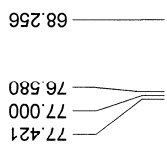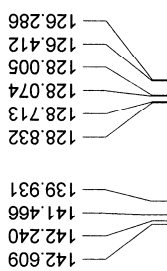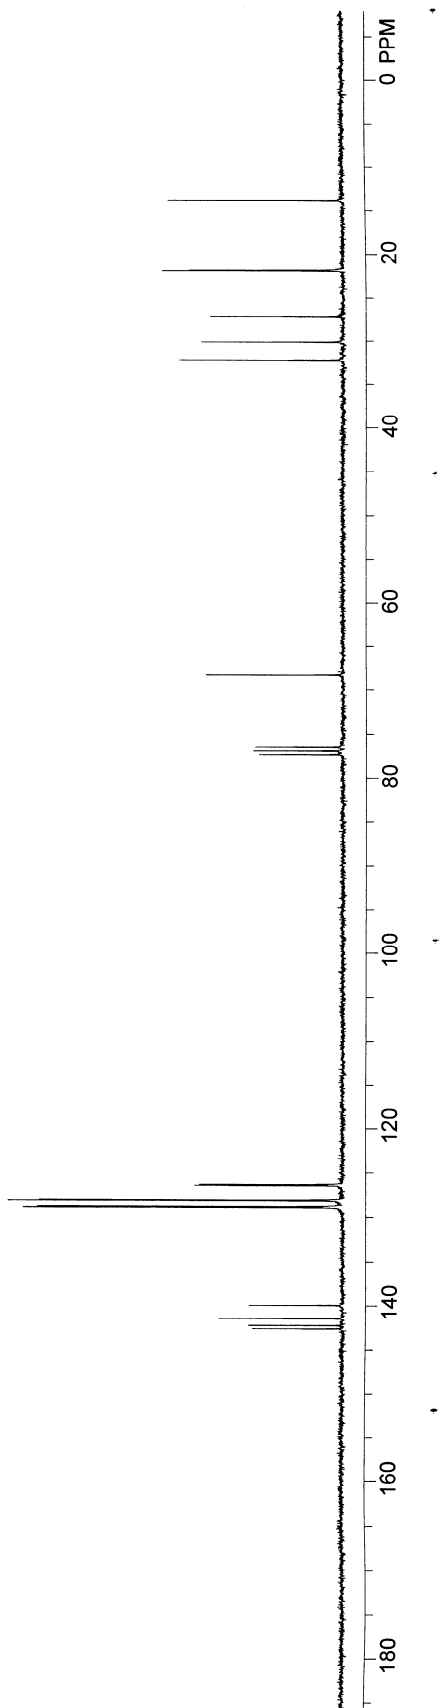

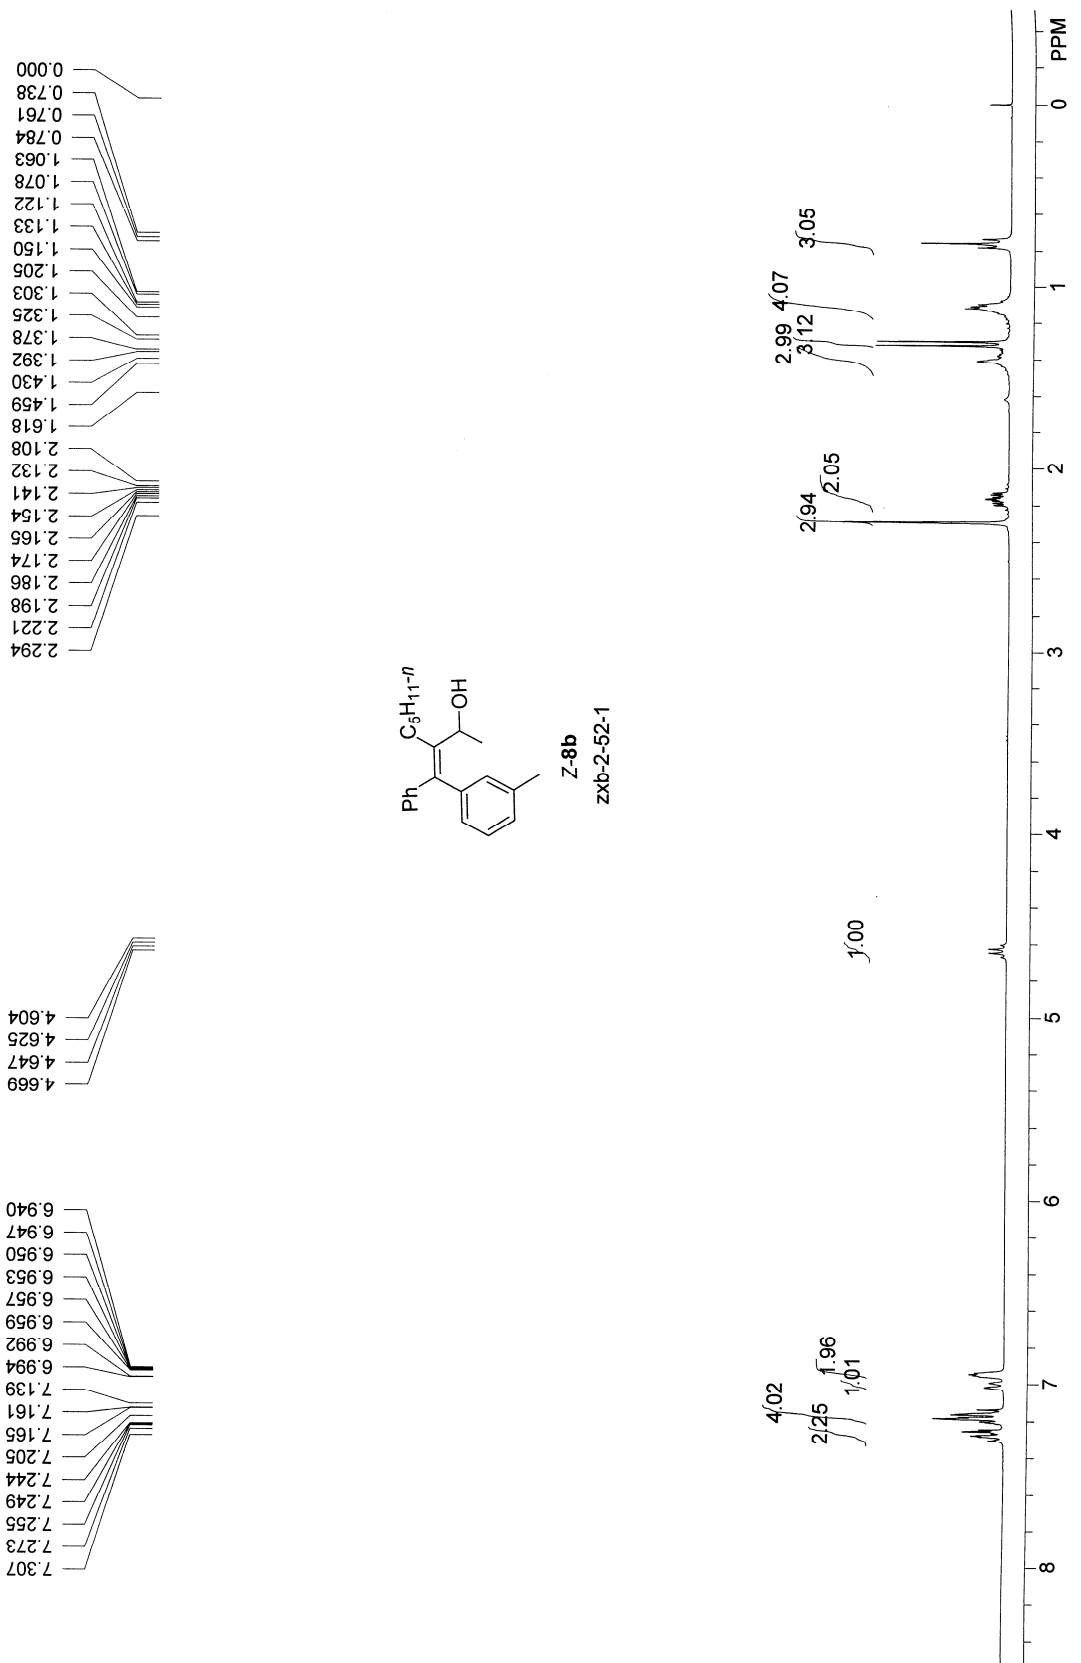

32.308  
30.275  
27.393  
22.093  
21.984  
21.435  
13.892

68.483  
77.425  
77.000  
76.576

142.719  
142.272  
141.319  
140.269  
137.733  
129.448  
128.706  
128.068  
128.024  
127.283  
126.316  
125.900

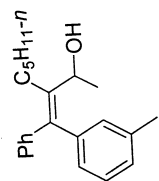

Z-8b

zxb-2-54-1-c

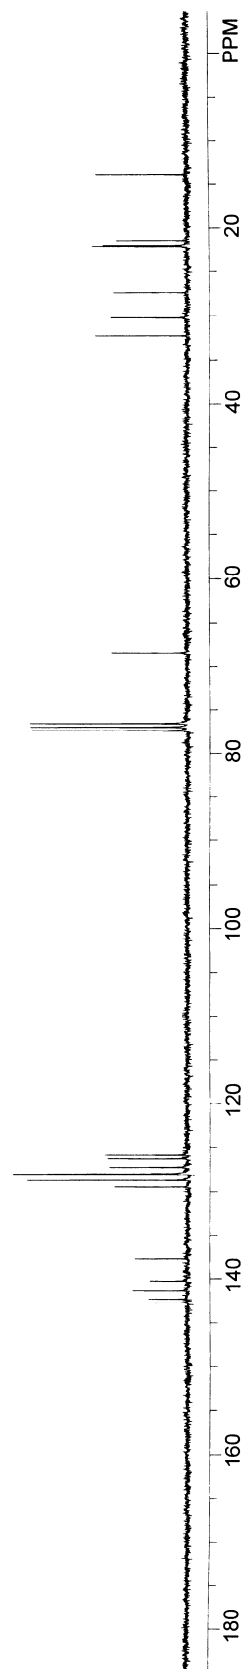

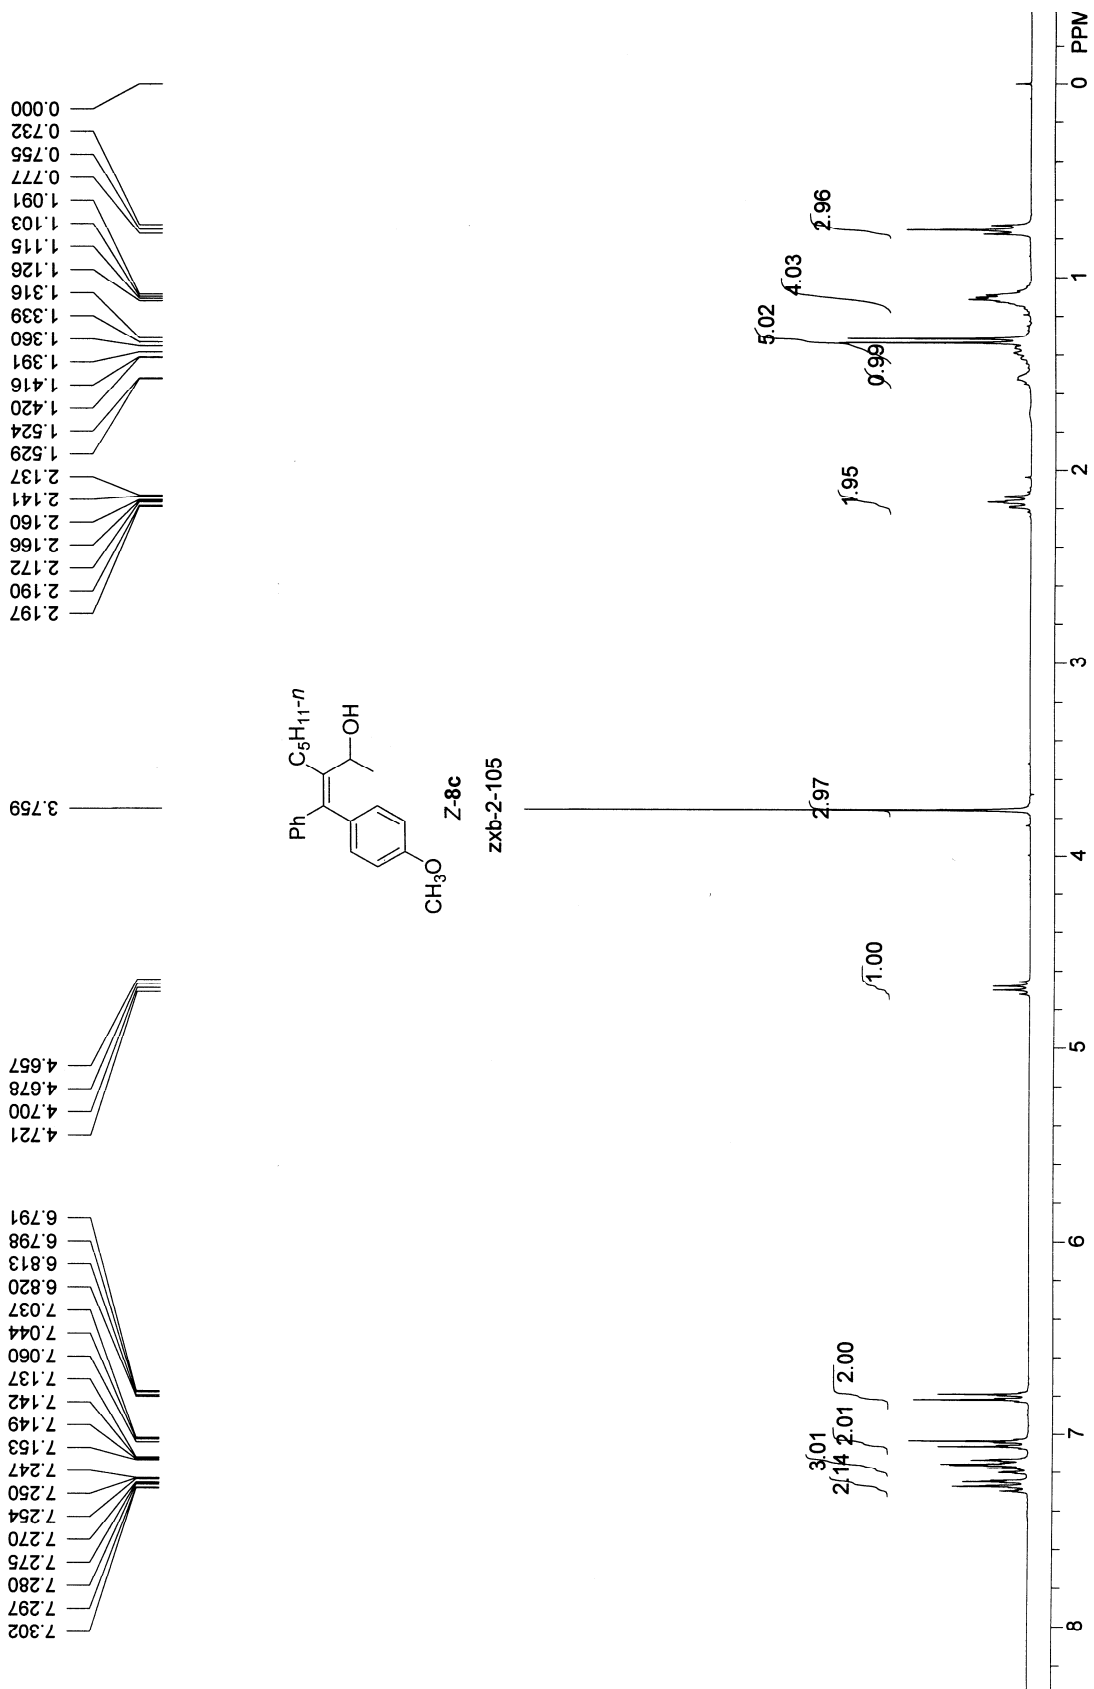

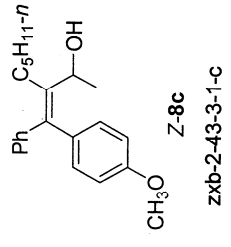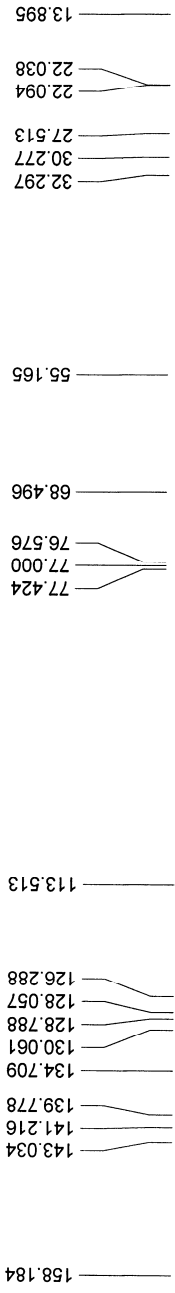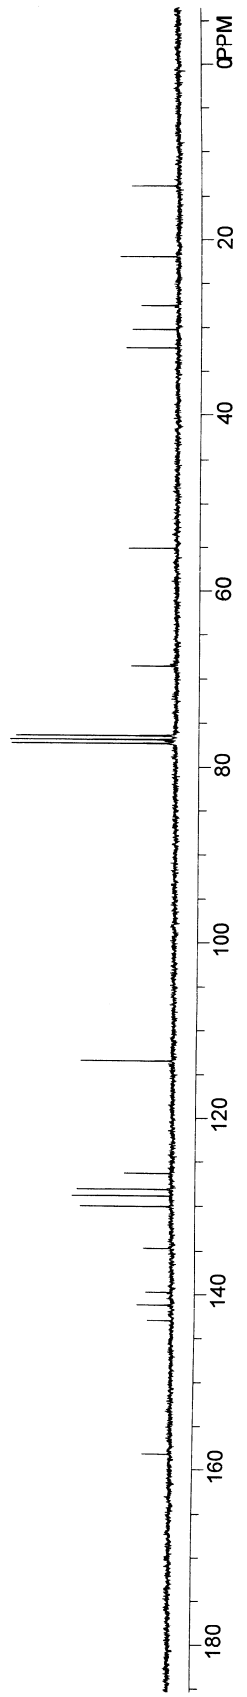



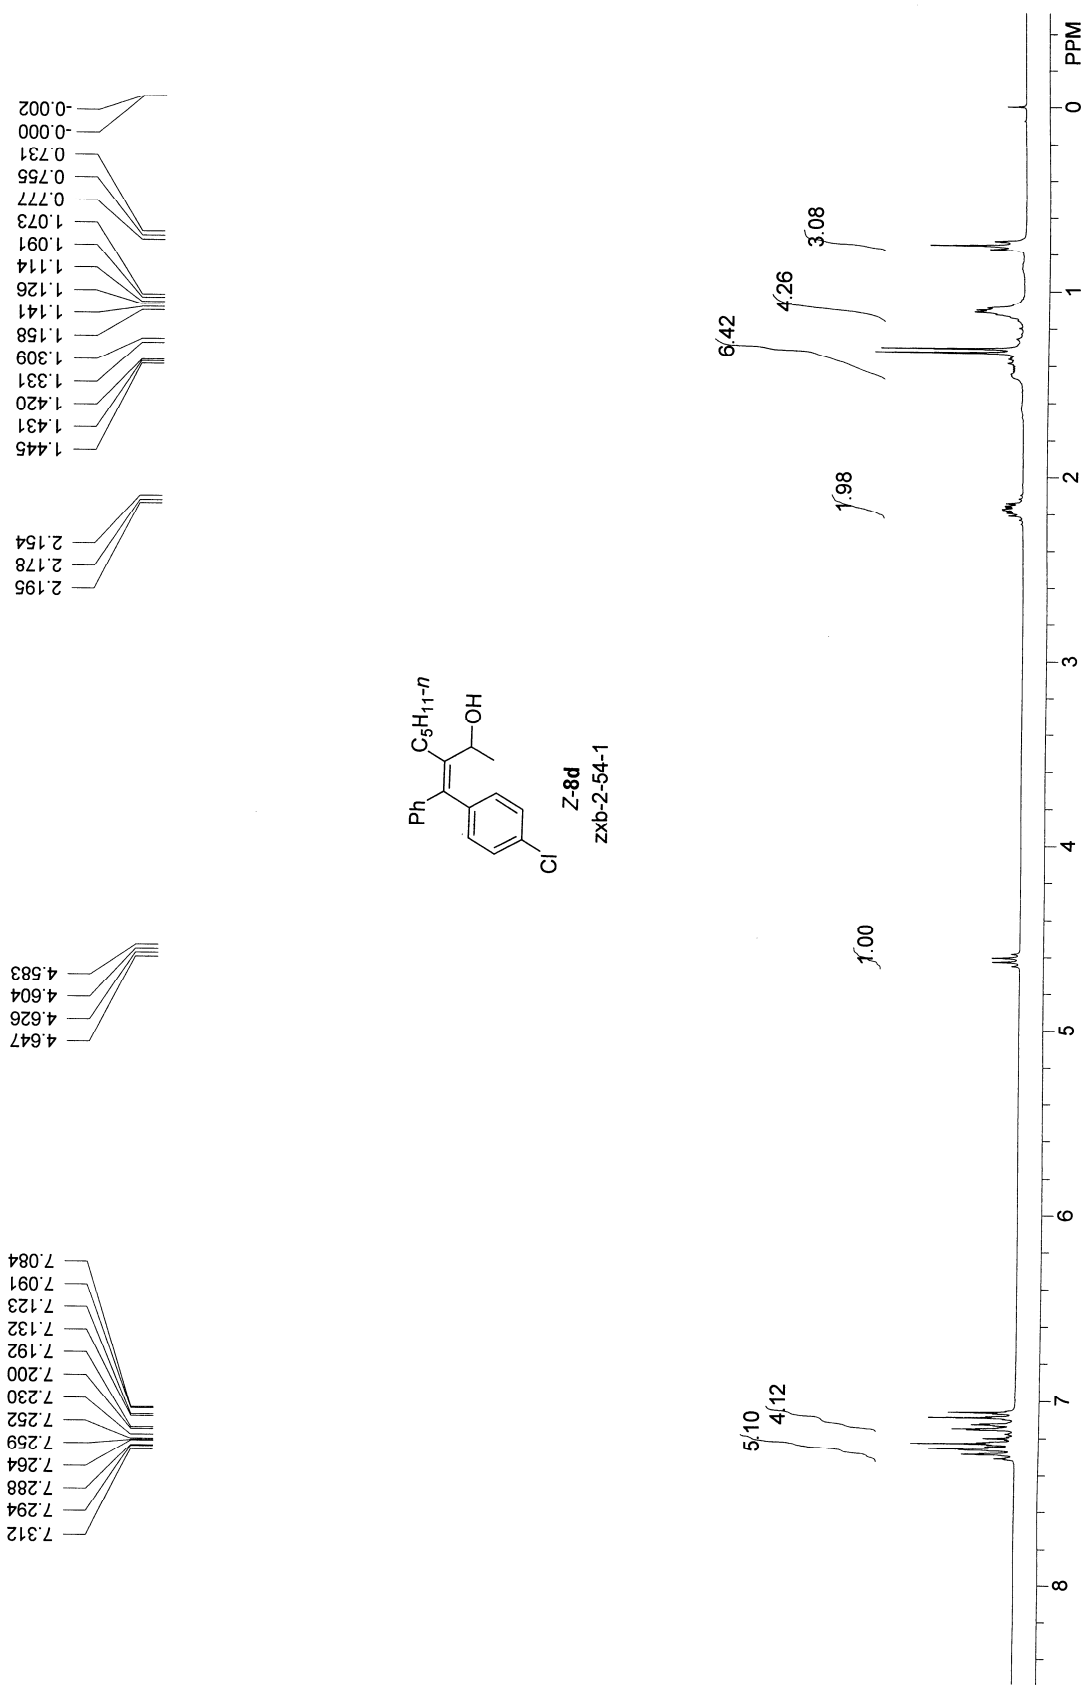

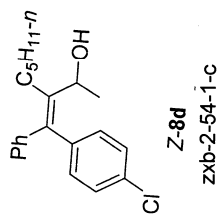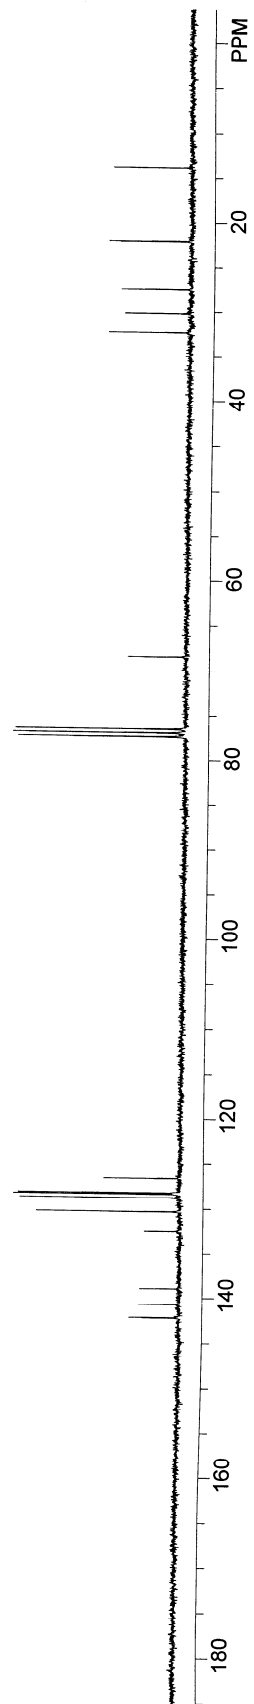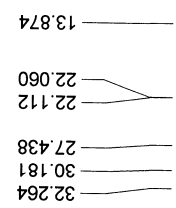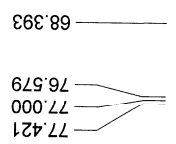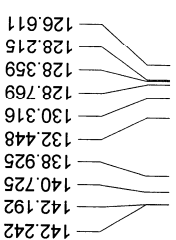

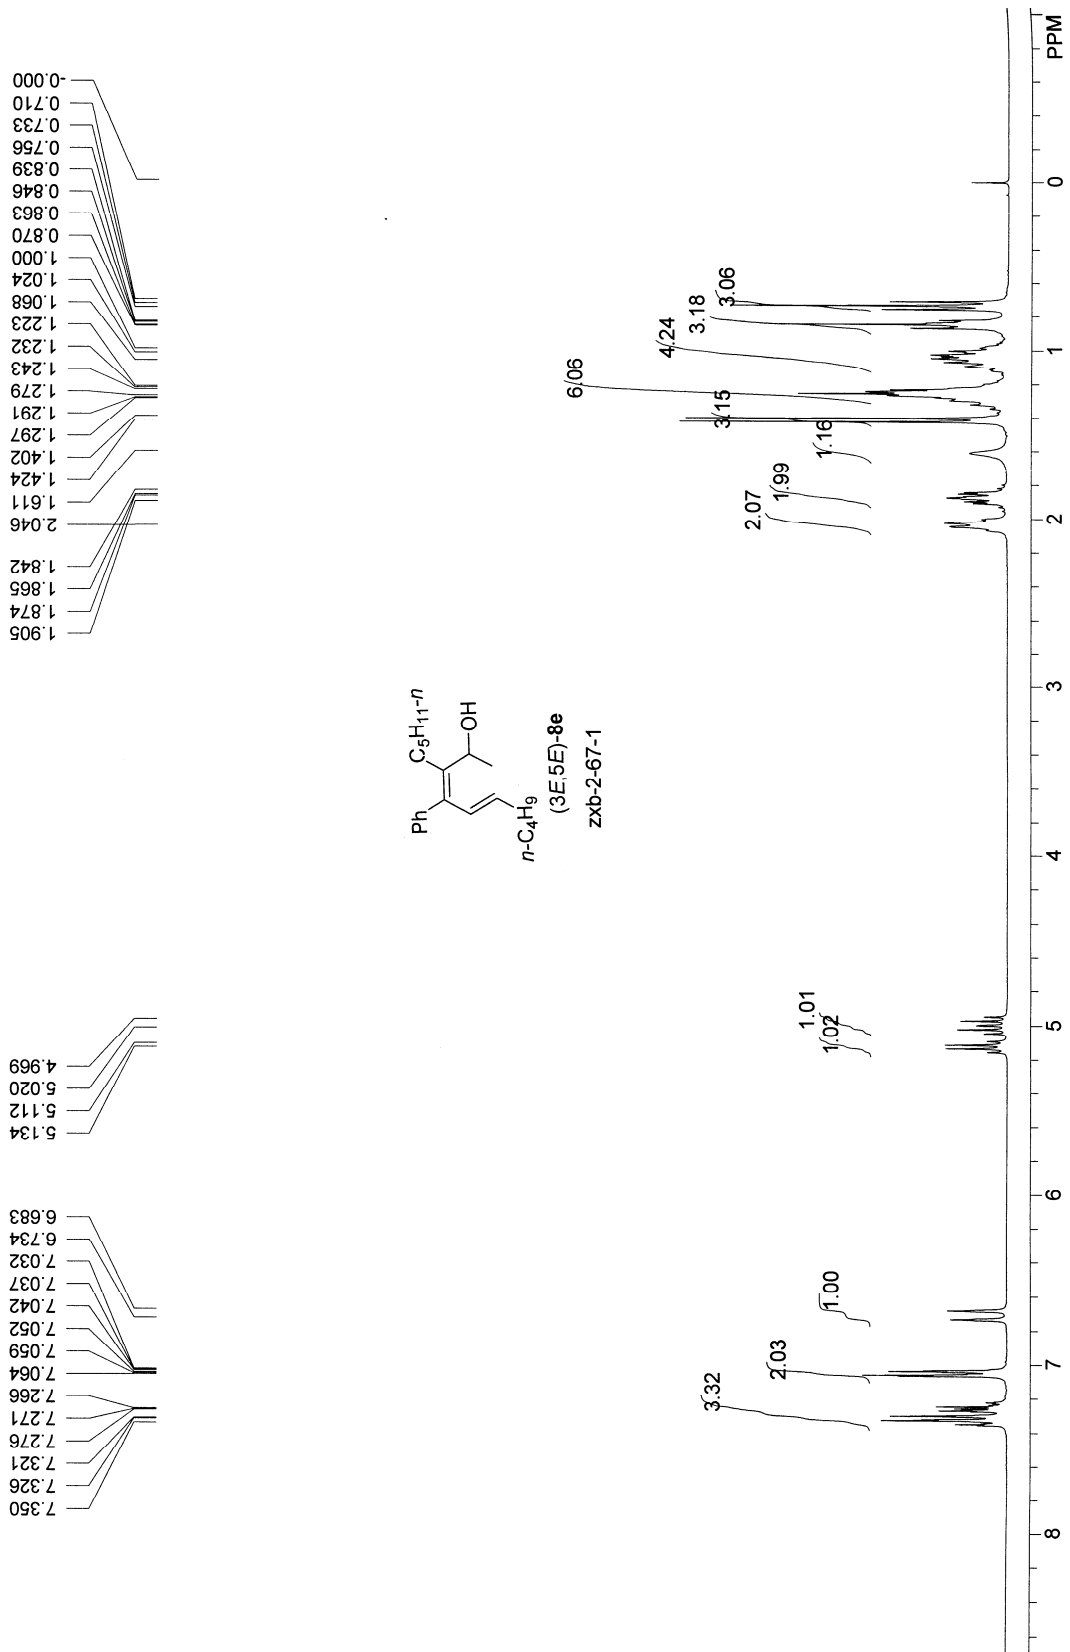

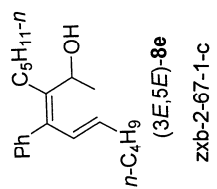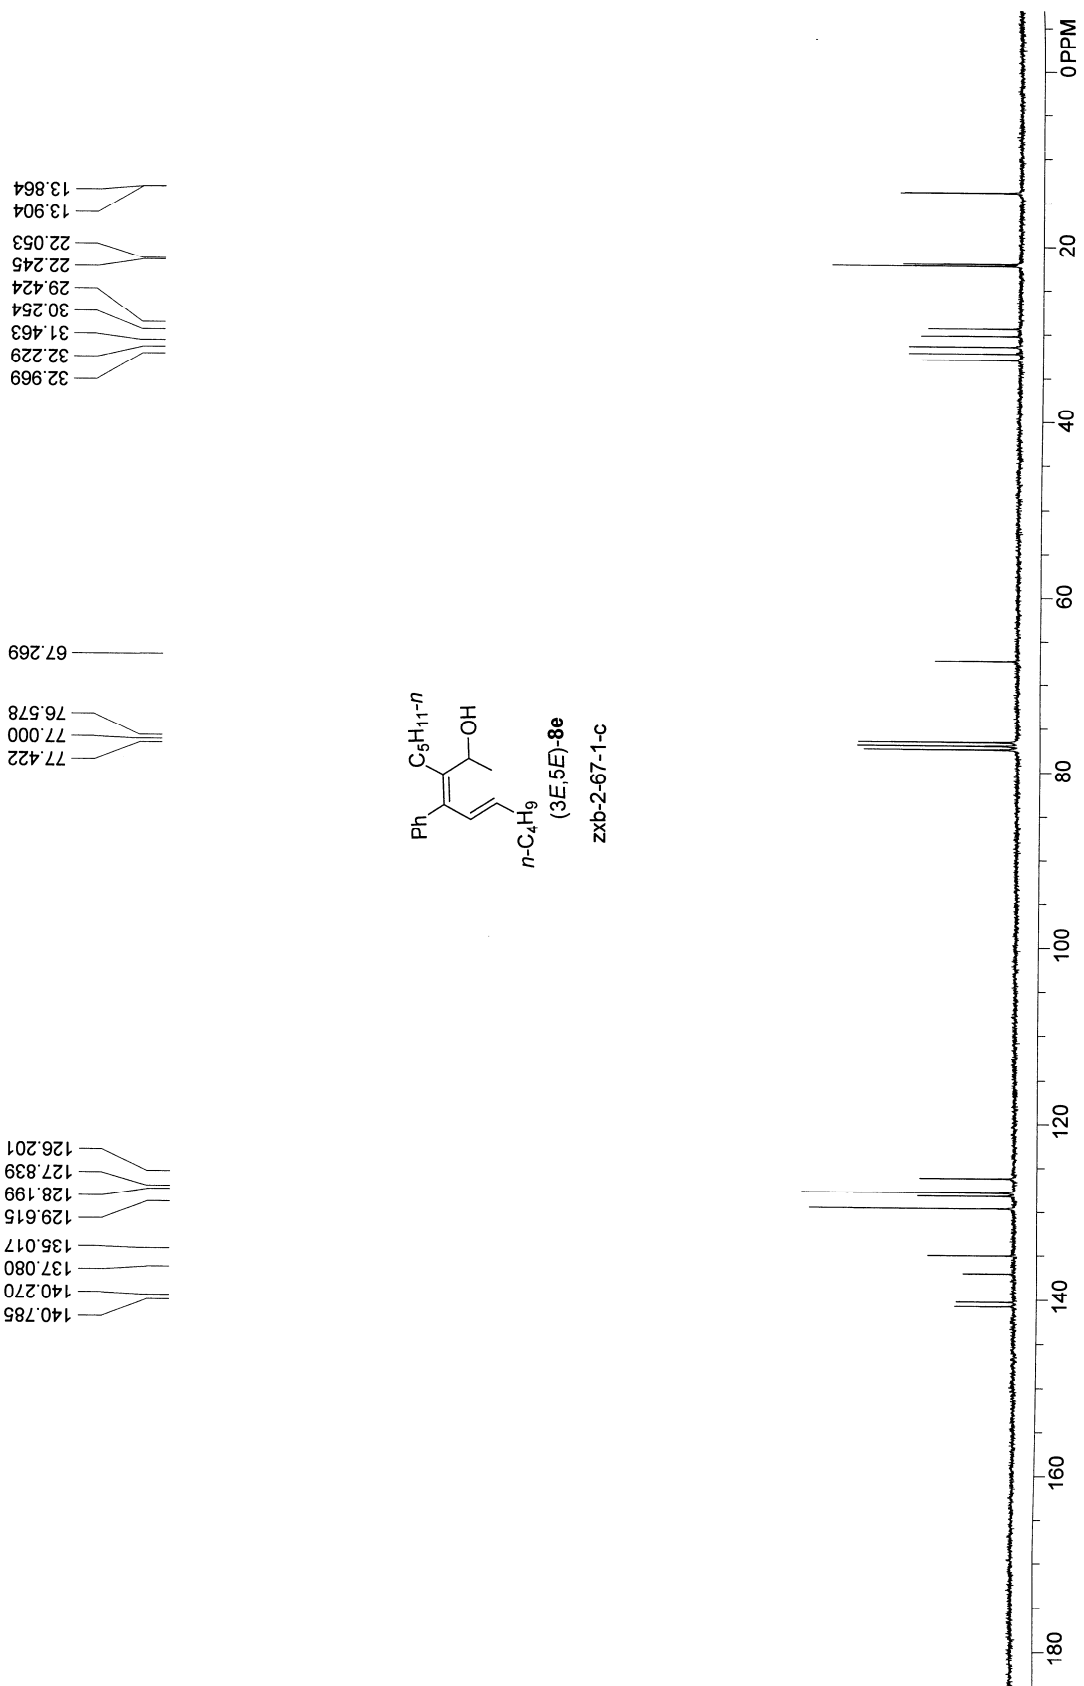

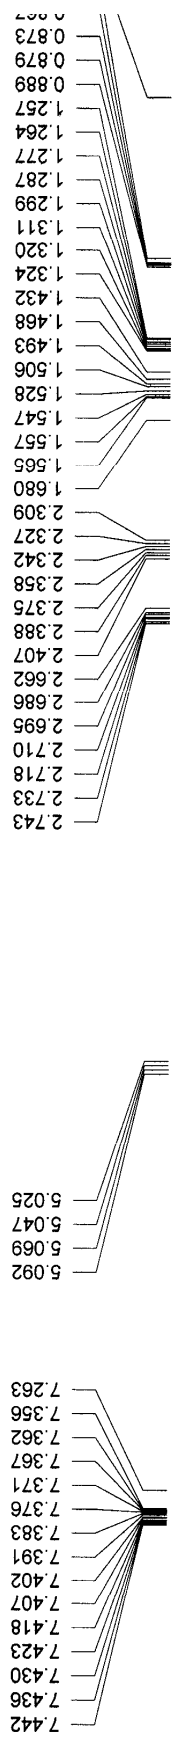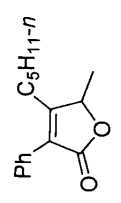

zxb-1-138-2

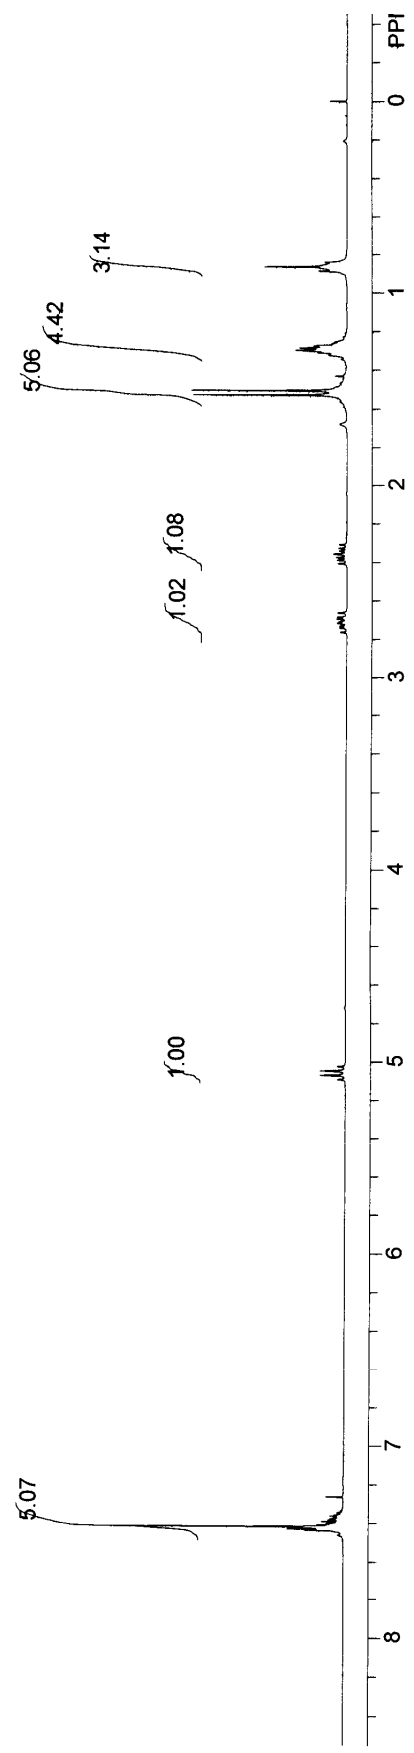

31.594  
27.355  
26.713  
22.110  
18.272  
13.752

77.903  
77.424  
77.000  
76.576

130.029  
128.821  
128.341  
128.249  
126.392

172.559  
166.082

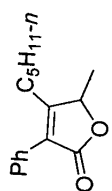

zxb-1-138-2-c

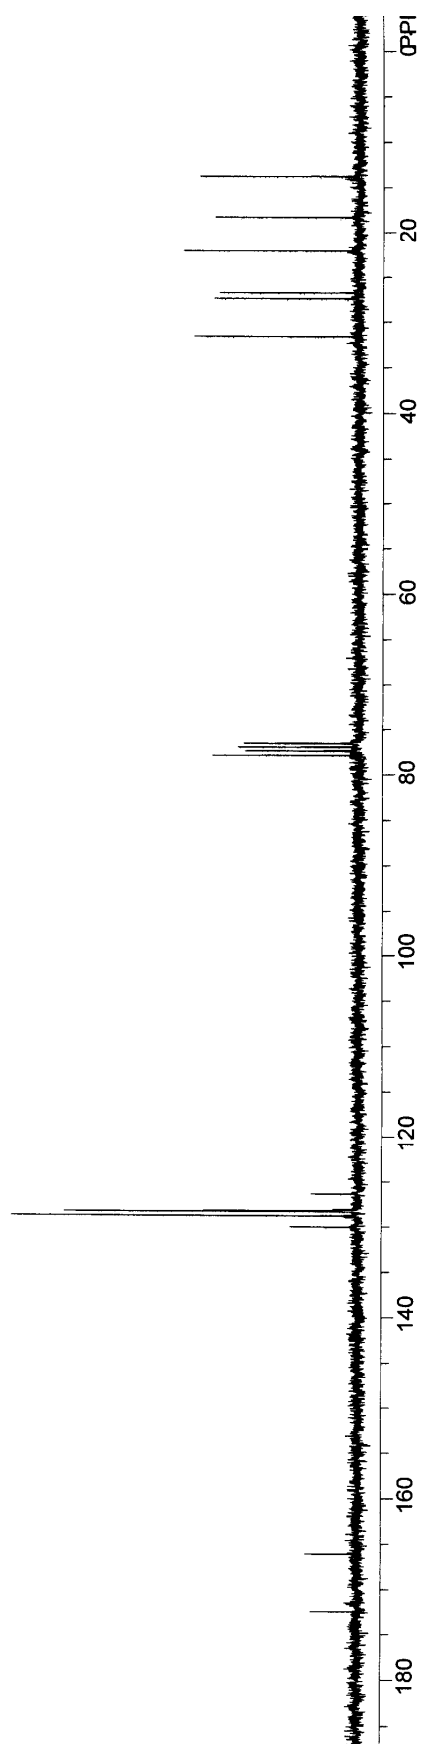

Supplement: b903769a.pdf [file b903769a.pdf]
